# Supplementary material for: Bach1Deficiency and Accompanying Overexpression of Heme Oxygenase-1 Do Not Influence Aging or Tumorigenesis in Mice
Source: Hindawi journal article supplement (doi:10.1155/2014/757901), 2014-01-01
Supplement: f1 [file 757901.f1.pdf]

**Supplementary table I.** Bach1 knockout signature in mice liver

Upregulated entities

| Agilent probe ID | Fold change | p-value (Corr) | Gene Symbol          | Genbank Accession |
|------------------|-------------|----------------|----------------------|-------------------|
| A_55_P2044653    | 32.6        | 2.2.E-02       | <i>Cyp2b10</i>       | NM_009999         |
| A_55_P2408588    | 20.9        | 2.1.E-02       | <i>Arntl</i>         | NM_007489         |
| A_55_P2059931    | 12.4        | 2.1.E-02       | <i>Prom1</i>         | NM_001163577      |
| A_52_P329367     | 9.7         | 4.3.E-02       | <i>Chka</i>          | NM_001025566      |
| A_55_P2044143    | 9.7         | 3.8.E-02       | <i>Loxl4</i>         | NM_001164311      |
| A_52_P321140     | 8.3         | 3.5.E-02       | <i>Defb1</i>         | NM_007843         |
| A_55_P1962516    | 8.1         | 2.1.E-02       | <i>Fam19a2</i>       | NM_182807         |
| A_55_P1980214    | 7.2         | 2.2.E-02       | N/A                  | N/A               |
| A_51_P480119     | 6.8         | 2.1.E-02       | <i>Prelid2</i>       | NM_029942         |
| A_66_P124179     | 6.8         | 3.8.E-02       | <i>Atp6v0d2</i>      | NM_175406         |
| A_55_P2030524    | 6.8         | 4.9.E-02       | <i>Vldlr</i>         | NM_013703         |
| A_55_P2020072    | 6.7         | 2.3.E-02       | N/A                  | N/A               |
| A_55_P2156062    | 6.3         | 3.7.E-02       | <i>Pick1</i>         | AK090155          |
| A_55_P2429480    | 6.1         | 2.3.E-02       | <i>Atad2</i>         | NM_027435         |
| A_51_P362066     | 5.9         | 3.7.E-02       | <i>Chi3l1</i>        | NM_007695         |
| A_51_P440047     | 5.8         | 3.2.E-02       | <i>1110067D22Rik</i> | NM_173752         |
| A_51_P248666     | 5.6         | 3.2.E-02       | <i>Cd274</i>         | NM_021893         |
| A_52_P48681      | 5.4         | 3.1.E-02       | <i>Cldn1</i>         | NM_016674         |
| A_51_P142923     | 5.4         | 3.2.E-02       | <i>Chka</i>          | NM_013490         |
| A_55_P2111508    | 5.4         | 2.5.E-02       | <i>Ttyh1</i>         | NM_021324         |
| A_55_P2072005    | 5.3         | 3.6.E-02       | <i>Ctsc</i>          | AK152524          |
| A_55_P2030938    | 5.0         | 2.9.E-02       | <i>Trim59</i>        | NM_025863         |
| A_55_P1962224    | 5.0         | 3.5.E-02       | <i>Afap1l2</i>       | NM_146102         |
| A_55_P2091191    | 5.0         | 3.0.E-02       | <i>Slc28a2</i>       | NM_172980         |
| A_55_P2214348    | 4.8         | 3.9.E-02       | <i>4930469K13Rik</i> | AK037310          |
| A_51_P257675     | 4.8         | 5.0.E-02       | <i>Tspyl4</i>        | NM_030203         |
| A_52_P140005     | 4.7         | 2.7.E-02       | <i>Nipal1</i>        | NM_001081205      |
| A_66_P114381     | 4.7         | 2.1.E-02       | <i>Ypel2</i>         | NM_001005341      |
| A_52_P350537     | 4.6         | 2.7.E-02       | <i>Mtmr11</i>        | NM_181409         |
| A_51_P423709     | 4.5         | 3.4.E-02       | <i>Fam84a</i>        | NM_029007         |
| A_55_P1964871    | 4.4         | 2.1.E-02       | <i>Gm5549</i>        | XM_485313         |
| A_55_P2072771    | 4.4         | 4.1.E-02       | <i>Cd3g</i>          | NM_009850         |
| A_52_P402786     | 4.3         | 4.3.E-02       | <i>Prom1</i>         | NM_008935         |
| A_51_P286748     | 4.3         | 3.8.E-02       | <i>Frzb</i>          | NM_011356         |
| A_51_P467448     | 4.2         | 2.6.E-02       | <i>Pif1</i>          | NM_172453         |
| A_51_P247637     | 4.1         | 3.2.E-02       | <i>Rnf144a</i>       | NM_080563         |
| A_55_P2161055    | 4.0         | 2.1.E-02       | <i>Trp63</i>         | NM_001127261      |

|               |     |          |                      |              |
|---------------|-----|----------|----------------------|--------------|
| A_51_P488196  | 4.0 | 2.3.E-02 | <i>Bmper</i>         | NM_028472    |
| A_55_P1965836 | 3.9 | 2.1.E-02 | <i>Crebbp</i>        | NM_001025432 |
| A_51_P424810  | 3.9 | 4.1.E-02 | <i>Ncapg2</i>        | NM_133762    |
| A_55_P2059010 | 3.8 | 3.2.E-02 | <i>Rbp1</i>          | NM_011254    |
| A_55_P2090874 | 3.8 | 4.5.E-02 | <i>Ysk4</i>          | NM_011737    |
| A_55_P2177911 | 3.8 | 4.7.E-02 | <i>Lepr</i>          | NM_010704    |
| A_55_P1983152 | 3.8 | 4.3.E-02 | <i>Gramd4</i>        | NM_001205353 |
| A_55_P2073377 | 3.8 | 3.5.E-02 | <i>Mki67</i>         | NM_001081117 |
| A_52_P54280   | 3.7 | 4.3.E-02 | <i>Adck3</i>         | NM_023341    |
| A_55_P2112360 | 3.7 | 2.3.E-02 | <i>Arhgap17</i>      | NM_144529    |
| A_51_P386899  | 3.7 | 2.3.E-02 | <i>Mfsd7c</i>        | NM_145447    |
| A_51_P304683  | 3.6 | 3.8.E-02 | <i>Clpx</i>          | NM_011802    |
| A_55_P1955637 | 3.6 | 4.9.E-02 | <i>Trp53i11</i>      | NM_001025246 |
| A_55_P2039274 | 3.5 | 3.8.E-02 | <i>Hspb3</i>         | NM_019960    |
| A_51_P314186  | 3.5 | 3.1.E-02 | <i>Syne1</i>         | NM_001079686 |
| A_55_P1953723 | 3.5 | 4.9.E-02 | <i>Rab13</i>         | AK080805     |
| A_52_P488437  | 3.5 | 2.1.E-02 | <i>Plek2</i>         | NM_013738    |
| A_55_P2107207 | 3.4 | 2.3.E-02 | <i>Gpr137b</i>       | AK009736     |
| A_51_P267354  | 3.4 | 3.1.E-02 | <i>Lrfn3</i>         | NM_175478    |
| A_55_P1954231 | 3.3 | 4.2.E-02 | <i>Lrtm2</i>         | NM_172492    |
| A_55_P2072493 | 3.3 | 2.1.E-02 | <i>F8</i>            | NM_001161374 |
| A_55_P2102350 | 3.3 | 3.5.E-02 | <i>Stambp11</i>      | NM_029682    |
| A_55_P2152427 | 3.3 | 4.3.E-02 | <i>Zwilch</i>        | NM_026507    |
| A_55_P2105152 | 3.3 | 4.2.E-02 | <i>Trim59</i>        | NM_025863    |
| A_51_P253803  | 3.3 | 4.2.E-02 | <i>Mki67</i>         | NM_001081117 |
| A_55_P2095103 | 3.2 | 4.3.E-02 | <i>Gucy1a2</i>       | NM_001033322 |
| A_51_P405606  | 3.2 | 3.2.E-02 | <i>Ndrp1</i>         | NM_008681    |
| A_55_P1954798 | 3.2 | 3.7.E-02 | <i>Gm15292</i>       | NM_001177487 |
| A_55_P2119772 | 3.2 | 3.9.E-02 | <i>Scn3a</i>         | NM_018732    |
| A_52_P131353  | 3.2 | 4.4.E-02 | <i>Camk1d</i>        | NM_177343    |
| A_52_P102248  | 3.2 | 3.1.E-02 | <i>Mex3b</i>         | NM_175366    |
| A_66_P111191  | 3.2 | 4.0.E-02 | N/A                  | Z48592       |
| A_55_P2351505 | 3.2 | 3.7.E-02 | <i>Dhx9</i>          | NM_007842    |
| A_51_P331288  | 3.1 | 2.1.E-02 | <i>Akr1b7</i>        | NM_009731    |
| A_52_P354373  | 3.1 | 2.1.E-02 | <i>1190002F15Rik</i> | NR_037956    |
| A_51_P415546  | 3.1 | 3.5.E-02 | <i>Defb6</i>         | NM_054074    |
| A_55_P2128869 | 3.1 | 3.2.E-02 | <i>Ccdc80</i>        | NM_026439    |
| A_55_P2448776 | 3.1 | 3.3.E-02 | <i>Mdn1</i>          | NM_001081392 |
| A_52_P89477   | 3.0 | 4.4.E-02 | <i>Bcl9</i>          | AK147659     |
| A_55_P2110245 | 3.0 | 4.1.E-02 | <i>Figl1</i>         | NM_001163359 |
| A_55_P2156524 | 3.0 | 4.2.E-02 | N/A                  | N/A          |

|               |     |          |                      |              |
|---------------|-----|----------|----------------------|--------------|
| A_55_P1983773 | 3.0 | 2.3.E-02 | <i>Birc5</i>         | NM_001012273 |
| A_51_P144349  | 3.0 | 3.6.E-02 | <i>Dtx4</i>          | NM_172442    |
| A_55_P1992247 | 3.0 | 4.1.E-02 | <i>Rergl</i>         | NM_001128090 |
| A_55_P2316041 | 3.0 | 2.7.E-02 | <i>N/A</i>           | BC050972     |
| A_55_P2251974 | 3.0 | 3.2.E-02 | <i>A930038B10Rik</i> | AK044736     |
| A_55_P2103026 | 3.0 | 4.9.E-02 | <i>Sema3d</i>        | NM_028882    |
| A_55_P2045741 | 3.0 | 4.2.E-02 | <i>Fyb</i>           | NM_011815    |
| A_55_P1980636 | 2.9 | 4.3.E-02 | <i>Aurka</i>         | NM_011497    |
| A_55_P2003483 | 2.9 | 3.4.E-02 | <i>Gldc</i>          | NM_138595    |
| A_55_P2133225 | 2.9 | 2.1.E-02 | <i>Mmgt2</i>         | NM_175002    |
| A_51_P352594  | 2.9 | 2.5.E-02 | <i>St5</i>           | NM_001001326 |
| A_51_P302358  | 2.8 | 2.3.E-02 | <i>Ltb</i>           | NM_008518    |
| A_55_P2080956 | 2.8 | 4.1.E-02 | <i>Chka</i>          | NM_013490    |
| A_52_P476731  | 2.8 | 4.1.E-02 | <i>Fam110c</i>       | NM_027828    |
| A_55_P1967500 | 2.8 | 4.6.E-02 | <i>Nell1</i>         | NM_001037906 |
| A_55_P2061779 | 2.8 | 2.8.E-02 | <i>Zfp456</i>        | NM_001001186 |
| A_52_P354682  | 2.8 | 3.2.E-02 | <i>Elovl7</i>        | NM_029001    |
| A_55_P2033041 | 2.8 | 4.9.E-02 | <i>Sirpb1b</i>       | NM_001173460 |
| A_66_P139683  | 2.7 | 2.3.E-02 | <i>Zbp1</i>          | NM_021394    |
| A_52_P186937  | 2.7 | 2.4.E-02 | <i>Cmpk2</i>         | NM_020557    |
| A_52_P235861  | 2.7 | 4.1.E-02 | <i>Peg3</i>          | NM_008817    |
| A_51_P391454  | 2.7 | 3.0.E-02 | <i>Il7</i>           | NM_008371    |
| A_55_P1956083 | 2.7 | 3.0.E-02 | <i>Gpr68</i>         | NM_175493    |
| A_55_P2169064 | 2.7 | 4.2.E-02 | <i>Olf1474</i>       | NM_001011842 |
| A_51_P314397  | 2.7 | 3.9.E-02 | <i>Crip2</i>         | NM_024223    |
| A_55_P2050226 | 2.6 | 3.3.E-02 | <i>Ccr11</i>         | AY072938     |
| A_55_P1985070 | 2.6 | 4.6.E-02 | <i>Robo1</i>         | NM_019413    |
| A_55_P2098598 | 2.6 | 2.3.E-02 | <i>Btg1</i>          | NM_007569    |
| A_55_P2102624 | 2.6 | 3.4.E-02 | <i>Eaf2</i>          | NM_001113401 |
| A_52_P1076124 | 2.6 | 4.1.E-02 | <i>N/A</i>           | AK053814     |
| A_55_P1983883 | 2.5 | 4.8.E-02 | <i>Vps37a</i>        | NM_033560    |
| A_51_P228295  | 2.5 | 2.3.E-02 | <i>Mpzl1</i>         | NM_001001880 |
| A_52_P534583  | 2.5 | 4.7.E-02 | <i>Ahsp</i>          | NM_133245    |
| A_51_P520966  | 2.5 | 4.4.E-02 | <i>Icosl</i>         | NM_015790    |
| A_55_P1960197 | 2.5 | 3.1.E-02 | <i>P2ry14</i>        | NM_133200    |
| A_55_P2108784 | 2.5 | 4.2.E-02 | <i>Arhgap22</i>      | NM_153800    |
| A_51_P199135  | 2.5 | 3.8.E-02 | <i>Cd83</i>          | NM_009856    |
| A_51_P204402  | 2.4 | 3.4.E-02 | <i>Shcbp1</i>        | NM_011369    |
| A_51_P112355  | 2.4 | 2.3.E-02 | <i>Igtp</i>          | NM_018738    |
| A_55_P1970110 | 2.4 | 3.2.E-02 | <i>Gm281</i>         | XM_138893    |
| A_55_P1954086 | 2.4 | 4.7.E-02 | <i>Postn</i>         | NM_001198766 |

|               |     |          |                      |              |
|---------------|-----|----------|----------------------|--------------|
| A_55_P2472435 | 2.4 | 4.0.E-02 | <i>Gbp3</i>          | NM_018734    |
| A_55_P2003221 | 2.3 | 3.6.E-02 | <i>Gimap3</i>        | NM_031247    |
| A_52_P180373  | 2.3 | 3.5.E-02 | <i>Mpeg1</i>         | NM_010821    |
| A_52_P502771  | 2.3 | 3.7.E-02 | <i>Rad54b</i>        | NM_001039556 |
| A_51_P234956  | 2.3 | 3.0.E-02 | <i>Xcl1</i>          | NM_008510    |
| A_55_P2079991 | 2.3 | 3.8.E-02 | <i>Gipc3</i>         | NM_148951    |
| A_51_P505493  | 2.3 | 3.7.E-02 | <i>Elovl5</i>        | NM_134255    |
| A_55_P2137611 | 2.3 | 2.7.E-02 | <i>Irgm2</i>         | NM_019440    |
| A_51_P484111  | 2.3 | 3.8.E-02 | <i>Matn2</i>         | NM_016762    |
| A_55_P2158404 | 2.3 | 4.1.E-02 | <i>Cmpk2</i>         | NM_020557    |
| A_55_P2077901 | 2.3 | 4.9.E-02 | <i>Cd2</i>           | NM_013486    |
| A_55_P1982499 | 2.2 | 4.8.E-02 | <i>Gldn</i>          | NM_177350    |
| A_55_P1975045 | 2.2 | 5.0.E-02 | <i>Sgcg</i>          | NM_011892    |
| A_66_P118513  | 2.2 | 3.0.E-02 | <i>Sept11</i>        | NM_001009818 |
| A_51_P181565  | 2.2 | 4.5.E-02 | <i>Hbegf</i>         | NM_010415    |
| A_51_P335569  | 2.2 | 4.4.E-02 | <i>Slco1a4</i>       | NM_030687    |
| A_55_P2030752 | 2.2 | 4.2.E-02 | <i>Nedd4l</i>        | NM_031881    |
| A_55_P2022678 | 2.2 | 4.1.E-02 | <i>C1qtnf1</i>       | NM_001204129 |
| A_55_P2293007 | 2.2 | 4.3.E-02 | <i>AI662175</i>      | AK139019     |
| A_55_P1981455 | 2.2 | 4.2.E-02 | N/A                  | N/A          |
| A_55_P2072980 | 2.2 | 5.0.E-02 | <i>Spna2</i>         | NM_001177668 |
| A_55_P2106106 | 2.2 | 4.1.E-02 | <i>Gpr77</i>         | NM_176912    |
| A_55_P1964327 | 2.2 | 5.0.E-02 | <i>Ppwd1</i>         | NM_172807    |
| A_51_P446825  | 2.2 | 4.5.E-02 | <i>6430573F11Rik</i> | NM_176952    |
| A_51_P439876  | 2.1 | 4.7.E-02 | <i>Map4k4</i>        | NM_008696    |
| A_52_P1044655 | 2.1 | 4.3.E-02 | <i>Vcan</i>          | NM_172955    |
| A_55_P1982201 | 2.1 | 3.4.E-02 | <i>Sgsm2</i>         | NM_197943    |
| A_51_P215077  | 2.1 | 4.1.E-02 | <i>Mgst3</i>         | NM_025569    |
| A_51_P246773  | 2.1 | 4.8.E-02 | <i>Sesn3</i>         | NM_030261    |
| A_51_P321341  | 2.1 | 5.0.E-02 | <i>Sult1a1</i>       | NM_133670    |
| A_55_P2007273 | 2.1 | 4.2.E-02 | <i>Pole</i>          | NM_011132    |
| A_55_P2136678 | 2.1 | 3.5.E-02 | N/A                  | XR_108249    |
| A_55_P2109227 | 2.1 | 3.5.E-02 | <i>Glt1d1</i>        | NM_177005    |
| A_51_P451346  | 2.1 | 3.3.E-02 | <i>Klf6</i>          | NM_011803    |
| A_55_P2035286 | 2.1 | 3.3.E-02 | <i>Uhrf1</i>         | NM_010931    |
| A_66_P101519  | 2.1 | 3.5.E-02 | <i>Abcc9</i>         | NM_021041    |
| A_55_P2133266 | 2.0 | 4.1.E-02 | <i>Cxx1c</i>         | NM_028375    |
| A_55_P2028259 | 2.0 | 4.6.E-02 | <i>Rhbdf2</i>        | NM_172572    |
| A_55_P2273656 | 2.0 | 4.1.E-02 | N/A                  | AK015069     |
| A_51_P349192  | 2.0 | 4.9.E-02 | <i>2210013O21Rik</i> | NR_028432    |
| A_55_P1963454 | 2.0 | 3.4.E-02 | <i>Cenpq</i>         | NM_031863    |

|               |     |          |                      |              |
|---------------|-----|----------|----------------------|--------------|
| A_55_P2109857 | 2.0 | 4.3.E-02 | <i>Rgs2</i>          | NM_009061    |
| A_52_P493091  | 2.0 | 4.5.E-02 | <i>Fmr1</i>          | NM_008031    |
| A_55_P2031357 | 2.0 | 4.3.E-02 | <i>Zfpm2</i>         | NM_011766    |
| A_66_P106905  | 1.9 | 4.6.E-02 | N/A                  | AK144962     |
| A_52_P229943  | 1.9 | 4.5.E-02 | <i>Ostb</i>          | NM_178933    |
| A_55_P2096883 | 1.9 | 4.0.E-02 | <i>Steap3</i>        | NM_001085409 |
| A_51_P323531  | 1.9 | 4.6.E-02 | <i>Fam71e1</i>       | NM_028169    |
| A_55_P2036007 | 1.9 | 4.3.E-02 | <i>Rai2</i>          | NM_198409    |
| A_55_P2042655 | 1.9 | 4.9.E-02 | <i>2210013O21Rik</i> | NR_028432    |
| A_55_P1994939 | 1.9 | 4.4.E-02 | <i>Hmgb2</i>         | NM_008252    |
| A_52_P1831    | 1.9 | 4.2.E-02 | <i>Zfp60</i>         | NM_009560    |
| A_55_P1988246 | 1.9 | 4.1.E-02 | N/A                  | N/A          |
| A_51_P382152  | 1.9 | 4.3.E-02 | <i>Procr</i>         | NM_011171    |
| A_55_P2097808 | 1.8 | 4.5.E-02 | <i>P4ha1</i>         | NM_011030    |
| A_55_P2166501 | 1.8 | 4.5.E-02 | <i>Cd44</i>          | NM_009851    |

## Downregulated entities

| Agilent probe ID | Fold change | p-value (Corr) | Gene Symbol          | Genbank Accession |
|------------------|-------------|----------------|----------------------|-------------------|
| A_55_P2032079    | 22.8        | 4.9.E-02       | <i>Dbp</i>           | NM_016974         |
| A_51_P211351     | 16.0        | 2.1.E-02       | <i>Olfr677</i>       | NM_146358         |
| A_51_P173976     | 14.6        | 2.1.E-02       | <i>Olfr935</i>       | NM_146746         |
| A_55_P2156219    | 13.2        | 4.5.E-02       | <i>Gm10549</i>       | AK141051          |
| A_55_P1989738    | 10.6        | 2.2.E-02       | <i>4930426L09Rik</i> | NR_024323         |
| A_55_P1966635    | 10.1        | 1.6.E-02       | <i>Vmn2r75</i>       | NM_001102578      |
| A_55_P2055834    | 9.5         | 1.6.E-02       | N/A                  | AK090145          |
| A_55_P2135153    | 9.0         | 2.4.E-02       | <i>Lcn13</i>         | NM_153558         |
| A_55_P2221236    | 8.1         | 2.1.E-02       | <i>AU024180</i>      | AK085976          |
| A_55_P1985788    | 7.8         | 3.9.E-02       | <i>Usp2</i>          | NM_198092         |
| A_66_P130650     | 7.4         | 2.1.E-02       | <i>Gm9979</i>        | XM_003085861      |
| A_55_P1989149    | 7.3         | 3.1.E-02       | <i>Olfr394</i>       | NM_147007         |
| A_55_P2053704    | 6.9         | 2.1.E-02       | <i>Pglyrp4</i>       | NM_001165968      |
| A_55_P2032423    | 6.9         | 2.1.E-02       | N/A                  | N/A               |
| A_55_P2103033    | 6.9         | 2.3.E-02       | N/A                  | N/A               |
| A_52_P248013     | 6.5         | 2.1.E-02       | <i>Chsy3</i>         | NM_001081328      |
| A_55_P2356263    | 6.4         | 2.3.E-02       | <i>Anks1b</i>        | AK036288          |
| A_55_P2007646    | 6.4         | 2.2.E-02       | <i>Cryaa</i>         | NM_013501         |
| A_55_P1971744    | 6.3         | 2.2.E-02       | <i>4921511M17Rik</i> | NM_001201358      |
| A_66_P129763     | 6.2         | 2.3.E-02       | <i>Gm6329</i>        | AK144087          |
| A_55_P2142334    | 6.2         | 2.1.E-02       | <i>Ly6h</i>          | NM_011837         |
| A_55_P2140731    | 6.1         | 3.9.E-02       | <i>Gm10876</i>       | XM_003085005      |

|               |     |          |                      |              |
|---------------|-----|----------|----------------------|--------------|
| A_55_P2169410 | 6.1 | 2.1.E-02 | <i>4930583I09Rik</i> | XM_128729    |
| A_51_P208987  | 6.1 | 2.3.E-02 | <i>Pgm3</i>          | NM_028352    |
| A_55_P2069760 | 6.0 | 2.1.E-02 | <i>Sprr2b</i>        | NM_011469    |
| A_55_P2125557 | 6.0 | 2.1.E-02 | <i>Irx2</i>          | NM_010574    |
| A_55_P2111267 | 5.9 | 2.1.E-02 | <i>Lhx9</i>          | NM_001042577 |
| A_55_P1952935 | 5.9 | 2.3.E-02 | <i>Olfr151</i>       | NM_207664    |
| A_55_P2057430 | 5.9 | 2.3.E-02 | <i>Lipn</i>          | NM_027340    |
| A_55_P2110542 | 5.8 | 2.7.E-02 | <i>N/A</i>           | N/A          |
| A_55_P2134725 | 5.8 | 2.1.E-02 | <i>N/A</i>           | N/A          |
| A_55_P2116165 | 5.7 | 2.3.E-02 | <i>Pfkfb3</i>        | NM_001177753 |
| A_55_P2073094 | 5.7 | 2.1.E-02 | <i>Trex2</i>         | NM_011907    |
| A_52_P347942  | 5.7 | 2.1.E-02 | <i>Olfr1384</i>      | NM_146472    |
| A_55_P2158663 | 5.7 | 2.1.E-02 | <i>Cldn7</i>         | N/A          |
| A_51_P243418  | 5.6 | 2.1.E-02 | <i>Clec2g</i>        | NM_027562    |
| A_55_P2075127 | 5.6 | 2.3.E-02 | <i>Pax2</i>          | NM_011037    |
| A_55_P2122300 | 5.5 | 2.1.E-02 | <i>Cir1</i>          | NM_025854    |
| A_55_P2018594 | 5.5 | 2.7.E-02 | <i>N/A</i>           | XM_888852    |
| A_51_P102122  | 5.4 | 2.3.E-02 | <i>Myog</i>          | NM_031189    |
| A_55_P2069679 | 5.4 | 3.5.E-02 | <i>Olfr746</i>       | NM_146298    |
| A_55_P2207186 | 5.3 | 2.3.E-02 | <i>Slc30a7</i>       | NM_023214    |
| A_66_P122730  | 5.1 | 2.3.E-02 | <i>N/A</i>           | AK138367     |
| A_55_P1987117 | 5.1 | 2.3.E-02 | <i>Slc22a16</i>      | NM_027572    |
| A_55_P2344593 | 5.1 | 2.1.E-02 | <i>N/A</i>           | AK016119     |
| A_51_P218953  | 5.1 | 2.3.E-02 | <i>Zfp536</i>        | NM_172385    |
| A_55_P1994733 | 5.1 | 2.3.E-02 | <i>Tmem14a</i>       | AK017734     |
| A_51_P151246  | 5.0 | 2.1.E-02 | <i>Olfr924</i>       | NM_207560    |
| A_55_P2143683 | 5.0 | 2.1.E-02 | <i>Gm9927</i>        | AK034060     |
| A_55_P1975682 | 5.0 | 2.3.E-02 | <i>Rhox2e</i>        | NM_001085348 |
| A_52_P329398  | 4.9 | 3.0.E-02 | <i>Atp12a</i>        | NM_138652    |
| A_55_P1973447 | 4.9 | 3.1.E-02 | <i>Ybx2</i>          | N/A          |
| A_51_P228159  | 4.9 | 2.1.E-02 | <i>4930430O22Rik</i> | XM_003085348 |
| A_55_P2091413 | 4.9 | 5.0.E-02 | <i>N/A</i>           | XM_978485    |
| A_55_P2136788 | 4.9 | 2.1.E-02 | <i>N/A</i>           | N/A          |
| A_52_P529660  | 4.8 | 2.3.E-02 | <i>Lrrc52</i>        | NM_001013382 |
| A_66_P126877  | 4.7 | 2.3.E-02 | <i>Vmn1r214</i>      | NM_134214    |
| A_55_P2160691 | 4.7 | 2.1.E-02 | <i>N/A</i>           | CK031974     |
| A_55_P2036585 | 4.7 | 3.5.E-02 | <i>Gm13547</i>       | AK133213     |
| A_55_P1979893 | 4.7 | 3.9.E-02 | <i>Tef</i>           | NM_017376    |
| A_55_P2391185 | 4.7 | 2.1.E-02 | <i>AI195381</i>      | DV044254     |
| A_55_P2119907 | 4.6 | 2.1.E-02 | <i>Dnahc11</i>       | NM_010060    |
| A_55_P2027708 | 4.6 | 2.1.E-02 | <i>5830416P10Rik</i> | NR_028427    |

|               |     |          |                      |              |
|---------------|-----|----------|----------------------|--------------|
| A_55_P2106068 | 4.5 | 2.7.E-02 | <i>Myh2</i>          | NM_001039545 |
| A_55_P2128195 | 4.5 | 3.3.E-02 | <i>Pm20d2</i>        | NM_001034867 |
| A_55_P1958798 | 4.5 | 2.1.E-02 | <i>Mobp</i>          | NM_008614    |
| A_55_P2062171 | 4.5 | 3.4.E-02 | <i>Odf3</i>          | AK005883     |
| A_55_P2159717 | 4.5 | 2.1.E-02 | <i>Gm5591</i>        | NM_001013810 |
| A_55_P1999187 | 4.5 | 3.1.E-02 | <i>Cdk12</i>         | NM_026952    |
| A_55_P1954393 | 4.5 | 2.1.E-02 | <i>Susd4</i>         | NM_144796    |
| A_55_P2122479 | 4.5 | 2.3.E-02 | <i>N/A</i>           | DV656125     |
| A_52_P262930  | 4.5 | 3.1.E-02 | <i>2310081J21Rik</i> | AK036683     |
| A_55_P1956598 | 4.4 | 3.3.E-02 | <i>N/A</i>           | BC019489     |
| A_51_P392429  | 4.4 | 2.1.E-02 | <i>Mrgpre</i>        | NM_175534    |
| A_66_P122621  | 4.4 | 4.1.E-02 | <i>Gm9889</i>        | AK038322     |
| A_66_P138178  | 4.4 | 2.1.E-02 | <i>Gm4107</i>        | AK041437     |
| A_51_P514256  | 4.4 | 2.1.E-02 | <i>Tubb2b</i>        | NM_023716    |
| A_55_P2058761 | 4.4 | 2.1.E-02 | <i>G6pc2</i>         | NM_021331    |
| A_55_P1997345 | 4.4 | 2.1.E-02 | <i>Gm11568</i>       | NM_001205030 |
| A_55_P2086730 | 4.3 | 2.3.E-02 | <i>Olfir910</i>      | NM_146811    |
| A_55_P2083186 | 4.3 | 2.3.E-02 | <i>LOC100009614</i>  | NM_001081452 |
| A_55_P2094108 | 4.3 | 2.1.E-02 | <i>N/A</i>           | N/A          |
| A_51_P263965  | 4.3 | 2.1.E-02 | <i>Hmox1</i>         | NM_010442    |
| A_55_P2083307 | 4.3 | 5.0.E-02 | <i>Capn8</i>         | NM_130890    |
| A_55_P2145977 | 4.2 | 2.1.E-02 | <i>Fbxw15</i>        | NM_199036    |
| A_55_P2023988 | 4.2 | 2.1.E-02 | <i>Gm8008</i>        | XM_001477516 |
| A_55_P2083909 | 4.2 | 2.7.E-02 | <i>N/A</i>           | N/A          |
| A_66_P130813  | 4.2 | 2.1.E-02 | <i>Samd4</i>         | NM_001037221 |
| A_55_P1994147 | 4.1 | 2.3.E-02 | <i>Zar1</i>          | NM_174877    |
| A_55_P2099947 | 4.1 | 3.0.E-02 | <i>Gdf1</i>          | NM_001163282 |
| A_52_P536494  | 4.1 | 4.9.E-02 | <i>Mycn</i>          | NM_008709    |
| A_52_P514352  | 4.1 | 2.1.E-02 | <i>Kcnk5</i>         | NM_021542    |
| A_55_P2177371 | 4.0 | 2.1.E-02 | <i>Gm3086</i>        | NR_036607    |
| A_55_P2173288 | 4.0 | 2.4.E-02 | <i>Pcdhb1</i>        | NM_053126    |
| A_66_P101561  | 4.0 | 2.3.E-02 | <i>Gm2176</i>        | NR_028424    |
| A_51_P409637  | 4.0 | 2.3.E-02 | <i>4930505A04Rik</i> | NM_001100394 |
| A_55_P2256393 | 3.8 | 2.2.E-02 | <i>1700030L22Rik</i> | BU961976     |
| A_55_P2369400 | 3.8 | 2.3.E-02 | <i>1700066O22Rik</i> | NR_015541    |
| A_66_P120732  | 3.8 | 2.3.E-02 | <i>Gpr45</i>         | NM_053107    |
| A_55_P2187076 | 3.8 | 2.3.E-02 | <i>Sncg</i>          | NM_011430    |
| A_55_P1981195 | 3.8 | 3.1.E-02 | <i>N/A</i>           | N/A          |
| A_55_P2040071 | 3.8 | 4.0.E-02 | <i>Eddm3b</i>        | NM_203508    |
| A_55_P2167171 | 3.8 | 2.1.E-02 | <i>N/A</i>           | N/A          |
| A_55_P2068125 | 3.7 | 2.1.E-02 | <i>Myct1</i>         | NM_026793    |

|               |     |          |                      |              |
|---------------|-----|----------|----------------------|--------------|
| A_66_P132787  | 3.7 | 3.1.E-02 | <i>N/A</i>           | M11859       |
| A_55_P2217851 | 3.6 | 2.7.E-02 | <i>4930453L07Rik</i> | AK015455     |
| A_52_P11402   | 3.6 | 2.3.E-02 | <i>Lrrc24</i>        | NM_198119    |
| A_55_P2058220 | 3.6 | 4.0.E-02 | <i>Prlhr</i>         | NM_201615    |
| A_55_P2012439 | 3.6 | 3.8.E-02 | <i>Tnfrsf19</i>      | NM_013869    |
| A_55_P2034033 | 3.6 | 2.1.E-02 | <i>Il12rb1</i>       | NM_008353    |
| A_55_P2132800 | 3.5 | 2.3.E-02 | <i>Zfp367</i>        | AK041361     |
| A_51_P121962  | 3.5 | 3.9.E-02 | <i>Lphn3</i>         | AK051766     |
| A_55_P2156727 | 3.5 | 3.3.E-02 | <i>Gm16509</i>       | XM_001473385 |
| A_55_P2378030 | 3.5 | 2.1.E-02 | <i>4933439N14Rik</i> | AK019859     |
| A_55_P2128113 | 3.5 | 2.2.E-02 | <i>Tbc1d12</i>       | NM_145952    |
| A_55_P2118604 | 3.5 | 2.3.E-02 | <i>St6galnac1</i>    | NM_011371    |
| A_55_P2012779 | 3.5 | 2.7.E-02 | <i>Rnf167</i>        | NM_027445    |
| A_52_P217240  | 3.4 | 2.1.E-02 | <i>Ppme1</i>         | NM_028292    |
| A_51_P184681  | 3.4 | 2.1.E-02 | <i>Olfr675</i>       | NM_001011848 |
| A_55_P2097773 | 3.4 | 4.1.E-02 | <i>Msh4</i>          | NM_031870    |
| A_52_P402127  | 3.4 | 3.2.E-02 | <i>Mup9</i>          | NM_001126319 |
| A_55_P2039514 | 3.4 | 3.0.E-02 | <i>N/A</i>           | N/A          |
| A_55_P2156780 | 3.4 | 2.1.E-02 | <i>N/A</i>           | CJ236021     |
| A_51_P229664  | 3.4 | 2.1.E-02 | <i>Cd27</i>          | NM_001033126 |
| A_55_P2230154 | 3.4 | 2.1.E-02 | <i>A730046J19Rik</i> | NR_040271    |
| A_55_P2033381 | 3.4 | 2.1.E-02 | <i>1810041L15Rik</i> | NM_001163145 |
| A_52_P275069  | 3.4 | 3.2.E-02 | <i>Gm6792</i>        | NM_001177416 |
| A_55_P2069197 | 3.3 | 2.5.E-02 | <i>Tas2r125</i>      | NM_207027    |
| A_55_P1973926 | 3.3 | 3.0.E-02 | <i>Ipo13</i>         | NM_146152    |
| A_55_P2364755 | 3.3 | 3.7.E-02 | <i>N/A</i>           | XM_003086948 |
| A_51_P377228  | 3.3 | 4.2.E-02 | <i>N/A</i>           | AK044378     |
| A_52_P520341  | 3.3 | 2.1.E-02 | <i>N/A</i>           | AK088084     |
| A_55_P2055112 | 3.3 | 3.2.E-02 | <i>Prss44</i>        | AB047758     |
| A_55_P2289824 | 3.3 | 3.3.E-02 | <i>1700121L16Rik</i> | AK007232     |
| A_66_P103052  | 3.3 | 2.1.E-02 | <i>N/A</i>           | N/A          |
| A_55_P2061104 | 3.2 | 3.2.E-02 | <i>Mup6</i>          | NM_001081285 |
| A_51_P153423  | 3.2 | 3.1.E-02 | <i>Fndc1</i>         | NM_001081416 |
| A_55_P2131168 | 3.2 | 2.3.E-02 | <i>Sv2c</i>          | NM_029210    |
| A_55_P2089488 | 3.2 | 5.0.E-02 | <i>Coq10b</i>        | NM_001039710 |
| A_55_P2019520 | 3.2 | 2.4.E-02 | <i>Cma2</i>          | NM_001024714 |
| A_55_P2122896 | 3.2 | 2.1.E-02 | <i>N/A</i>           | N/A          |
| A_55_P2000007 | 3.2 | 2.3.E-02 | <i>N/A</i>           | N/A          |
| A_52_P502226  | 3.2 | 3.7.E-02 | <i>2810429I04Rik</i> | NR_015522    |
| A_51_P450505  | 3.2 | 3.3.E-02 | <i>Olfr835</i>       | NM_001012266 |
| A_55_P2425801 | 3.2 | 3.2.E-02 | <i>Fmn1</i>          | NM_010230    |



|               |     |          |                      |              |
|---------------|-----|----------|----------------------|--------------|
| A_55_P2079569 | 3.2 | 2.1.E-02 | <i>Gm10555</i>       | XM_003086208 |
| A_66_P112495  | 3.2 | 2.3.E-02 | <i>Scn4b</i>         | NM_001013390 |
| A_55_P2103756 | 3.2 | 2.1.E-02 | <i>Hic2</i>          | NM_178922    |
| A_55_P2370384 | 3.2 | 3.0.E-02 | <i>1600029I14Rik</i> | NR_028123    |
| A_55_P1960659 | 3.2 | 2.3.E-02 | <i>Fer1l6</i>        | XM_905719    |
| A_55_P2059732 | 3.1 | 2.5.E-02 | <i>N/A</i>           | N/A          |
| A_51_P467668  | 3.1 | 4.3.E-02 | <i>Ick</i>           | NM_019987    |
| A_51_P167843  | 3.1 | 2.3.E-02 | <i>Timm17a</i>       | NM_011590    |
| A_55_P1966874 | 3.1 | 2.1.E-02 | <i>Rtbdn</i>         | NM_144929    |
| A_55_P2008996 | 3.1 | 4.8.E-02 | <i>Gm10034</i>       | AK164250     |
| A_52_P627269  | 3.1 | 2.3.E-02 | <i>Ces2b</i>         | NM_198171    |
| A_55_P2000289 | 3.1 | 3.0.E-02 | <i>Mab21l2</i>       | NM_011839    |
| A_51_P224593  | 3.1 | 2.1.E-02 | <i>Arl8a</i>         | NM_026823    |
| A_52_P195246  | 3.1 | 2.7.E-02 | <i>Esyt3</i>         | NM_177775    |
| A_55_P2169247 | 3.1 | 4.7.E-02 | <i>Gm15056</i>       | NM_001177471 |
| A_55_P2007703 | 3.1 | 3.3.E-02 | <i>Nanogpd</i>       | NM_001080945 |
| A_55_P2150328 | 3.1 | 3.2.E-02 | <i>N/A</i>           | N/A          |
| A_55_P2067757 | 3.0 | 3.5.E-02 | <i>Psg27</i>         | NM_001037168 |
| A_52_P318361  | 3.0 | 2.1.E-02 | <i>Ces2c</i>         | NM_145603    |
| A_51_P417876  | 3.0 | 2.1.E-02 | <i>Smyd5</i>         | NM_144918    |
| A_55_P2041082 | 3.0 | 2.3.E-02 | <i>N/A</i>           | N/A          |
| A_55_P2013710 | 3.0 | 3.5.E-02 | <i>Apoc3</i>         | N/A          |
| A_51_P226527  | 3.0 | 4.3.E-02 | <i>Vmn1r85</i>       | NM_145847    |
| A_55_P2065671 | 3.0 | 3.2.E-02 | <i>Ccnb1</i>         | NM_172301    |
| A_55_P2208463 | 3.0 | 2.3.E-02 | <i>6820426E19Rik</i> | XR_105017    |
| A_55_P2142488 | 3.0 | 3.2.E-02 | <i>Spry3</i>         | NM_001030293 |
| A_51_P517145  | 3.0 | 3.2.E-02 | <i>Sort1</i>         | NM_019972    |
| A_55_P2124712 | 2.9 | 2.3.E-02 | <i>Ces2c</i>         | NM_145603    |
| A_55_P2234889 | 2.9 | 3.1.E-02 | <i>C78704</i>        | CA882486     |
| A_55_P2007816 | 2.9 | 4.1.E-02 | <i>Mup4</i>          | NM_008648    |
| A_55_P2186302 | 2.9 | 4.3.E-02 | <i>Gm9866</i>        | XR_035276    |
| A_55_P2104587 | 2.9 | 3.3.E-02 | <i>N/A</i>           | N/A          |
| A_51_P396163  | 2.9 | 4.4.E-02 | <i>Mdm1</i>          | M20824       |
| A_55_P1997585 | 2.9 | 3.5.E-02 | <i>N/A</i>           | N/A          |
| A_55_P2089840 | 2.9 | 2.3.E-02 | <i>Eif2d</i>         | NM_001136070 |
| A_55_P2236291 | 2.8 | 2.3.E-02 | <i>Ppap2a</i>        | NM_008903    |
| A_51_P288010  | 2.8 | 2.6.E-02 | <i>Chrng</i>         | NM_009604    |
| A_55_P2005501 | 2.8 | 4.4.E-02 | <i>Olfr392</i>       | NM_147006    |
| A_55_P2290378 | 2.8 | 3.3.E-02 | <i>AU019176</i>      | BM228091     |
| A_55_P2109327 | 2.8 | 2.1.E-02 | <i>Ache</i>          | NM_009599    |
| A_55_P2099363 | 2.8 | 4.6.E-02 | <i>Stac2</i>         | NM_146028    |

|               |     |         |                      |              |
|---------------|-----|---------|----------------------|--------------|
| A_55_P2046671 | 2.8 | 3.0E-02 | <i>N/A</i>           | N/A          |
| A_55_P2092501 | 2.8 | 3.7E-02 | <i>Med1</i>          | NM_134027    |
| A_55_P1969131 | 2.8 | 4.3E-02 | <i>Cidec</i>         | NM_178373    |
| A_55_P2006930 | 2.8 | 3.4E-02 | <i>2610005L07Rik</i> | BC025151     |
| A_55_P2275249 | 2.8 | 3.0E-02 | <i>Th</i>            | NM_009377    |
| A_55_P2041668 | 2.8 | 4.3E-02 | <i>Foxl2</i>         | NM_012020    |
| A_51_P516119  | 2.8 | 2.7E-02 | <i>Olf1148</i>       | NM_001011519 |
| A_51_P377812  | 2.8 | 2.1E-02 | <i>1700011E24Rik</i> | NM_029298    |
| A_51_P340668  | 2.8 | 3.2E-02 | <i>Bcl9l</i>         | NM_030256    |
| A_52_P233305  | 2.7 | 3.3E-02 | <i>Adamts12</i>      | NM_175501    |
| A_55_P2082454 | 2.7 | 3.7E-02 | <i>N/A</i>           | N/A          |
| A_55_P2152240 | 2.7 | 2.3E-02 | <i>Gm10383</i>       | AK156988     |
| A_55_P1959891 | 2.7 | 2.9E-02 | <i>N/A</i>           | N/A          |
| A_55_P2440441 | 2.7 | 3.2E-02 | <i>Wdhd1</i>         | NM_172598    |
| A_55_P2182392 | 2.7 | 2.3E-02 | <i>Adat3</i>         | NM_001100606 |
| A_55_P2335723 | 2.7 | 3.8E-02 | <i>2900009J06Rik</i> | AA986756     |
| A_52_P676255  | 2.7 | 3.4E-02 | <i>Itpr1l1</i>       | NM_001163527 |
| A_66_P114449  | 2.7 | 3.2E-02 | <i>Vps39</i>         | NM_147153    |
| A_55_P2127243 | 2.7 | 3.2E-02 | <i>Tpsb2</i>         | NM_010781    |
| A_51_P500661  | 2.7 | 3.3E-02 | <i>Rnf182</i>        | NM_183204    |
| A_55_P2039289 | 2.7 | 3.2E-02 | <i>Hspb6</i>         | NM_001012401 |
| A_55_P2038882 | 2.7 | 2.4E-02 | <i>Niacr1</i>        | NM_030701    |
| A_55_P2205760 | 2.7 | 2.3E-02 | <i>C88045</i>        | C86380       |
| A_55_P2370160 | 2.7 | 4.9E-02 | <i>C130009A20Rik</i> | AK142864     |
| A_55_P2180086 | 2.7 | 3.9E-02 | <i>Lrrc28</i>        | NM_175124    |
| A_55_P2116794 | 2.7 | 3.3E-02 | <i>N/A</i>           | N/A          |
| A_51_P228971  | 2.7 | 3.2E-02 | <i>Slc5a4b</i>       | NM_023219    |
| A_55_P2146789 | 2.7 | 3.7E-02 | <i>N/A</i>           | N/A          |
| A_55_P2037930 | 2.6 | 4.1E-02 | <i>N/A</i>           | N/A          |
| A_52_P272145  | 2.6 | 4.5E-02 | <i>N/A</i>           | N/A          |
| A_55_P2250164 | 2.6 | 2.1E-02 | <i>Pcdhgc5</i>       | NM_033583    |
| A_55_P2130438 | 2.6 | 3.3E-02 | <i>6530409C15Rik</i> | XM_987873    |
| A_51_P316199  | 2.6 | 3.3E-02 | <i>Olf173</i>        | NM_054090    |
| A_55_P2166069 | 2.6 | 3.7E-02 | <i>2310079G19Rik</i> | NM_027173    |
| A_52_P395242  | 2.6 | 2.3E-02 | <i>Map2k6</i>        | AK086722     |
| A_66_P112593  | 2.6 | 4.0E-02 | <i>Sec61b</i>        | NM_024171    |
| A_55_P2032868 | 2.6 | 2.2E-02 | <i>4932412H11Rik</i> | NM_172879    |
| A_55_P2023391 | 2.6 | 2.3E-02 | <i>Grhl3</i>         | NM_001013756 |
| A_52_P204618  | 2.6 | 2.3E-02 | <i>Rnf222</i>        | NM_177060    |
| A_55_P2083257 | 2.6 | 4.9E-02 | <i>A3galt2</i>       | NM_001009819 |
| A_55_P2100281 | 2.6 | 4.1E-02 | <i>Defb30</i>        | DQ141309     |

|               |     |          |                      |              |
|---------------|-----|----------|----------------------|--------------|
| A_55_P2024634 | 2.6 | 3.2.E-02 | N/A                  | XR_104688    |
| A_55_P2074015 | 2.6 | 4.1.E-02 | N/A                  | N/A          |
| A_52_P388164  | 2.6 | 2.3.E-02 | <i>Olfr608</i>       | NM_146756    |
| A_55_P2124361 | 2.6 | 3.4.E-02 | N/A                  | N/A          |
| A_66_P134539  | 2.6 | 2.3.E-02 | <i>A430110L20Rik</i> | XM_003084469 |
| A_55_P2066862 | 2.6 | 3.2.E-02 | <i>Nsun7</i>         | NM_027602    |
| A_55_P2009439 | 2.6 | 3.1.E-02 | N/A                  | N/A          |
| A_55_P2138422 | 2.5 | 3.4.E-02 | <i>Obox1</i>         | NM_027802    |
| A_55_P2169445 | 2.5 | 2.3.E-02 | <i>Mfsd6</i>         | NM_133829    |
| A_52_P682996  | 2.5 | 3.5.E-02 | N/A                  | N/A          |
| A_55_P2022778 | 2.5 | 4.9.E-02 | <i>Trpc2</i>         | NM_011644    |
| A_51_P271068  | 2.5 | 2.3.E-02 | <i>Klf17</i>         | NM_029416    |
| A_55_P1987953 | 2.5 | 3.1.E-02 | <i>Gm5938</i>        | NM_001085534 |
| A_55_P2070938 | 2.5 | 4.8.E-02 | N/A                  | N/A          |
| A_55_P2157537 | 2.5 | 3.8.E-02 | <i>Gm10866</i>       | XM_003085086 |
| A_55_P2044803 | 2.5 | 3.2.E-02 | N/A                  | AK085886     |
| A_55_P2034091 | 2.5 | 4.6.E-02 | N/A                  | N/A          |
| A_55_P2008141 | 2.5 | 2.7.E-02 | <i>Gm10857</i>       | NR_033470    |
| A_52_P1092823 | 2.5 | 2.3.E-02 | <i>Irx1</i>          | NM_010573    |
| A_55_P1958532 | 2.5 | 3.0.E-02 | <i>Hr</i>            | NM_021877    |
| A_55_P1955871 | 2.5 | 2.2.E-02 | <i>Nlrp4f</i>        | NM_175290    |
| A_52_P15377   | 2.5 | 3.6.E-02 | <i>Wnt9b</i>         | NM_011719    |
| A_55_P2037737 | 2.5 | 3.4.E-02 | N/A                  | N/A          |
| A_55_P2045859 | 2.5 | 4.3.E-02 | N/A                  | N/A          |
| A_52_P150988  | 2.5 | 2.3.E-02 | <i>Txndc11</i>       | NM_029582    |
| A_55_P1967578 | 2.5 | 4.1.E-02 | <i>Olfr893</i>       | NM_146336    |
| A_52_P628212  | 2.5 | 2.3.E-02 | <i>Esrrb</i>         | AK044339     |
| A_51_P330144  | 2.4 | 5.0.E-02 | <i>Ift140</i>        | NM_134126    |
| A_55_P2009684 | 2.4 | 2.7.E-02 | <i>Zmiz1</i>         | AK169397     |
| A_51_P398069  | 2.4 | 5.0.E-02 | <i>Olfr992</i>       | NM_146865    |
| A_51_P219483  | 2.4 | 3.2.E-02 | <i>Tsku</i>          | NM_001024619 |
| A_51_P250571  | 2.4 | 3.6.E-02 | <i>Tas2r140</i>      | NM_021562    |
| A_55_P2157952 | 2.4 | 3.1.E-02 | <i>Gm10755</i>       | XM_003086133 |
| A_55_P1965821 | 2.4 | 3.1.E-02 | <i>Uppt</i>          | NM_001081189 |
| A_51_P313503  | 2.4 | 3.2.E-02 | <i>Olfr577</i>       | NM_147109    |
| A_55_P2116674 | 2.4 | 4.1.E-02 | N/A                  | N/A          |
| A_55_P2127194 | 2.4 | 3.1.E-02 | N/A                  | N/A          |
| A_66_P135403  | 2.4 | 2.3.E-02 | <i>AI481877</i>      | AK135748     |
| A_55_P2074045 | 2.4 | 4.9.E-02 | N/A                  | N/A          |
| A_55_P2181216 | 2.4 | 3.2.E-02 | N/A                  | N/A          |
| A_55_P2082519 | 2.4 | 3.5.E-02 | <i>Olfr883</i>       | NM_146419    |

|               |     |          |                      |              |
|---------------|-----|----------|----------------------|--------------|
| A_51_P201308  | 2.4 | 3.4.E-02 | <i>Moxd2</i>         | NM_139296    |
| A_55_P1972001 | 2.4 | 3.3.E-02 | <i>LOC100039183</i>  | XM_003086064 |
| A_55_P1963006 | 2.4 | 4.9.E-02 | <i>N/A</i>           | N/A          |
| A_55_P2182112 | 2.4 | 3.2.E-02 | <i>4833439L19Rik</i> | NM_133797    |
| A_66_P104751  | 2.4 | 4.1.E-02 | <i>2210404J11Rik</i> | AK019108     |
| A_51_P262489  | 2.4 | 3.0.E-02 | <i>Sst</i>           | NM_009215    |
| A_55_P2085518 | 2.3 | 3.9.E-02 | <i>N/A</i>           | N/A          |
| A_55_P1974917 | 2.3 | 2.3.E-02 | <i>Olfr368</i>       | NM_146374    |
| A_55_P1974522 | 2.3 | 3.2.E-02 | <i>A530099J19Rik</i> | NM_175688    |
| A_52_P344290  | 2.3 | 4.3.E-02 | <i>F2r</i>           | NM_010169    |
| A_51_P408199  | 2.3 | 4.1.E-02 | <i>Krtap4-2</i>      | NM_026807    |
| A_55_P2026385 | 2.3 | 3.7.E-02 | <i>N/A</i>           | N/A          |
| A_66_P137048  | 2.3 | 4.1.E-02 | <i>Men1</i>          | NM_008583    |
| A_51_P521052  | 2.3 | 3.8.E-02 | <i>Ly6k</i>          | NM_029627    |
| A_55_P2107647 | 2.3 | 4.2.E-02 | <i>N/A</i>           | N/A          |
| A_66_P117534  | 2.3 | 2.5.E-02 | <i>E030025P04Rik</i> | NR_037978    |
| A_55_P2054708 | 2.3 | 3.2.E-02 | <i>N/A</i>           | AK143362     |
| A_51_P259318  | 2.3 | 2.7.E-02 | <i>Fbrs</i>          | NM_010183    |
| A_52_P647607  | 2.3 | 5.0.E-02 | <i>Ubr4</i>          | NM_001160319 |
| A_55_P1958227 | 2.2 | 3.7.E-02 | <i>N/A</i>           | AK135304     |
| A_55_P2114110 | 2.2 | 5.0.E-02 | <i>Cadm4</i>         | NM_153112    |
| A_55_P1993148 | 2.2 | 4.7.E-02 | <i>Ascl4</i>         | NM_001163614 |
| A_52_P523368  | 2.2 | 3.2.E-02 | <i>Psap11</i>        | NM_175249    |
| A_52_P1045316 | 2.2 | 2.7.E-02 | <i>Gm428</i>         | NM_001081644 |
| A_55_P1961400 | 2.2 | 3.2.E-02 | <i>Grid2ip</i>       | NM_133355    |
| A_55_P2091274 | 2.2 | 3.5.E-02 | <i>Sly</i>           | NM_201530    |
| A_55_P2151675 | 2.2 | 3.9.E-02 | <i>N/A</i>           | AK164979     |
| A_51_P186956  | 2.2 | 3.5.E-02 | <i>Adam2</i>         | NM_009618    |
| A_55_P1996344 | 2.2 | 4.1.E-02 | <i>N/A</i>           | N/A          |
| A_55_P2283207 | 2.2 | 3.0.E-02 | <i>Maz</i>           | NM_010772    |
| A_51_P429366  | 2.2 | 3.6.E-02 | <i>Hes6</i>          | NM_019479    |
| A_55_P2154450 | 2.2 | 3.7.E-02 | <i>Xkr6</i>          | NM_173393    |
| A_55_P2019428 | 2.2 | 3.8.E-02 | <i>Htr1d</i>         | NM_008309    |
| A_51_P496309  | 2.2 | 4.1.E-02 | <i>Rfx4</i>          | NM_001024918 |
| A_52_P179785  | 2.2 | 3.2.E-02 | <i>Ripk2</i>         | NM_138952    |
| A_55_P1952882 | 2.2 | 3.2.E-02 | <i>Cyp4f18</i>       | AF233647     |
| A_66_P107482  | 2.2 | 3.9.E-02 | <i>Arhgef33</i>      | NM_001145452 |
| A_55_P2182586 | 2.2 | 4.5.E-02 | <i>Esrp1</i>         | NM_194055    |
| A_51_P146149  | 2.2 | 4.1.E-02 | <i>Napsa</i>         | NM_008437    |
| A_52_P81693   | 2.2 | 3.8.E-02 | <i>LOC100502592</i>  | XM_003084652 |
| A_52_P496726  | 2.2 | 5.0.E-02 | <i>Rasd1</i>         | NM_009026    |

|               |     |          |                      |              |
|---------------|-----|----------|----------------------|--------------|
| A_55_P2061899 | 2.2 | 4.1.E-02 | <i>N/A</i>           | N/A          |
| A_55_P2077263 | 2.2 | 4.1.E-02 | <i>Cenpk</i>         | NM_021790    |
| A_55_P1978895 | 2.2 | 3.2.E-02 | <i>Skint3</i>        | NM_177578    |
| A_55_P1964237 | 2.1 | 3.7.E-02 | <i>4932418E24Rik</i> | NM_177841    |
| A_55_P2141058 | 2.1 | 3.9.E-02 | <i>LOC100504710</i>  | NM_001201389 |
| A_55_P1963767 | 2.1 | 3.6.E-02 | <i>Npr2</i>          | NM_173788    |
| A_65_P18756   | 2.1 | 3.9.E-02 | <i>Klf17</i>         | NM_029416    |
| A_55_P2101939 | 2.1 | 3.3.E-02 | <i>Zfp112</i>        | NM_021307    |
| A_66_P115959  | 2.1 | 3.8.E-02 | <i>1700016H13Rik</i> | NM_001163550 |
| A_55_P2044054 | 2.1 | 3.4.E-02 | <i>AA465934</i>      | BB850827     |
| A_55_P1954511 | 2.1 | 4.3.E-02 | <i>Btbd10</i>        | NM_133700    |
| A_51_P356842  | 2.1 | 4.6.E-02 | <i>Olfr320</i>       | NM_207230    |
| A_55_P2016976 | 2.1 | 3.3.E-02 | <i>A530054K11Rik</i> | NM_183146    |
| A_55_P2182931 | 2.1 | 4.1.E-02 | <i>Sim2</i>          | NM_011377    |
| A_55_P2153923 | 2.1 | 3.9.E-02 | <i>Slc17a5</i>       | NM_172773    |
| A_55_P1959985 | 2.1 | 4.5.E-02 | <i>Alas1</i>         | NM_020559    |
| A_55_P2017343 | 2.1 | 3.3.E-02 | <i>Olfr767</i>       | NM_146318    |
| A_55_P2039530 | 2.1 | 4.1.E-02 | <i>Gm10724</i>       | XM_003086271 |
| A_55_P2067747 | 2.1 | 3.8.E-02 | <i>Psg21</i>         | NM_027403    |
| A_55_P1991069 | 2.1 | 4.3.E-02 | <i>Gm885</i>         | NM_001033435 |
| A_51_P443514  | 2.1 | 4.4.E-02 | <i>1700001K19Rik</i> | NM_025488    |
| A_51_P448784  | 2.1 | 4.8.E-02 | <i>Nrsn1</i>         | NM_009513    |
| A_55_P2246665 | 2.1 | 3.8.E-02 | <i>4833422M21Rik</i> | AK014752     |
| A_55_P2002642 | 2.1 | 3.8.E-02 | <i>Ccdc67</i>        | NM_181816    |
| A_52_P660422  | 2.1 | 4.5.E-02 | <i>Mip</i>           | NM_008600    |
| A_52_P362917  | 2.0 | 4.8.E-02 | <i>Pfkfb3</i>        | NM_133232    |
| A_51_P342307  | 2.0 | 4.6.E-02 | <i>Olfr732</i>       | NM_146665    |
| A_51_P358316  | 2.0 | 4.9.E-02 | <i>Chga</i>          | NM_007693    |
| A_55_P2136817 | 2.0 | 4.5.E-02 | <i>Coro2b</i>        | NM_175484    |
| A_55_P2398995 | 2.0 | 4.2.E-02 | <i>Lelp1</i>         | NM_027042    |
| A_52_P203770  | 2.0 | 4.5.E-02 | <i>Vmn2r61</i>       | NM_001105058 |
| A_55_P2139878 | 2.0 | 4.3.E-02 | <i>N/A</i>           | N/A          |
| A_51_P102421  | 2.0 | 3.5.E-02 | <i>Clcf1</i>         | NM_019952    |
| A_55_P2020911 | 2.0 | 4.0.E-02 | <i>Rps6ka6</i>       | NM_025949    |
| A_52_P466853  | 2.0 | 3.7.E-02 | <i>Bmyc</i>          | NM_023326    |
| A_55_P2078257 | 2.0 | 4.7.E-02 | <i>Gm10183</i>       | AK172566     |
| A_55_P2168736 | 2.0 | 4.3.E-02 | <i>Relb</i>          | NM_009046    |
| A_55_P2312741 | 2.0 | 4.8.E-02 | <i>AU046084</i>      | BG072043     |
| A_55_P2013470 | 1.9 | 5.0.E-02 | <i>Gm14743</i>       | NM_001126321 |
| A_51_P264444  | 1.9 | 4.0.E-02 | <i>Ralgapa2</i>      | AK038838     |
| A_55_P2290388 | 1.9 | 4.9.E-02 | <i>Rorb</i>          | NM_001043354 |

|               |     |          |                |           |
|---------------|-----|----------|----------------|-----------|
| A_51_P171616  | 1.9 | 4.1.E-02 | <i>Wnt10a</i>  | NM_009518 |
| A_66_P133213  | 1.9 | 4.1.E-02 | <i>Slc35f1</i> | NM_178675 |
| A_55_P1967391 | 1.9 | 4.8.E-02 | <i>Antxr1</i>  | AK013005  |
| A_51_P161554  | 1.9 | 4.7.E-02 | <i>Arid3b</i>  | NM_019689 |

**Supplementary table II.** Aging signature in Bach1 knockout mice liver

Upregulated entities

| Agilent probe ID | Fold change | p-value (Corr) | Gene Symbol     | Genbank Accession |
|------------------|-------------|----------------|-----------------|-------------------|
| A_55_P1952517    | 27076.3     | 2.1.E-06       | <i>Sult2a1</i>  | NM_001111296      |
| A_55_P1952512    | 21192.4     | 2.1.E-06       | <i>Sult2a2</i>  | NM_009286         |
| A_55_P1952507    | 9372.0      | 2.1.E-06       | <i>Sult2a4</i>  | NM_001101534      |
| A_55_P2172532    | 7475.3      | 2.1.E-06       | <i>Sult2a6</i>  | NM_001081325      |
| A_55_P2107223    | 7304.4      | 2.1.E-06       | <i>Sult2a6</i>  | NM_001081325      |
| A_52_P73552      | 2459.9      | 2.0.E-05       | <i>A1bg</i>     | NM_001081067      |
| A_52_P218833     | 1143.4      | 2.0.E-05       | <i>Sult2a3</i>  | NM_001101586      |
| A_52_P366803     | 535.4       | 8.3.E-05       | <i>Cyp3a44</i>  | NM_177380         |
| A_55_P1989248    | 527.4       | 2.1.E-06       | N/A             | N/A               |
| A_51_P269404     | 340.1       | 2.5.E-03       | <i>Fmo3</i>     | NM_008030         |
| A_55_P1991841    | 281.8       | 1.1.E-04       | <i>Slc22a27</i> | NM_134256         |
| A_55_P2020428    | 240.3       | 1.9.E-05       | <i>Slc22a26</i> | NM_146232         |
| A_51_P114722     | 150.7       | 8.3.E-05       | <i>Hao2</i>     | NM_019545         |
| A_55_P2129449    | 117.6       | 1.5.E-02       | <i>Sult3a1</i>  | NM_020565         |
| A_51_P144531     | 105.1       | 2.3.E-05       | <i>Slc22a29</i> | NM_172776         |
| A_55_P2107225    | 70.3        | 8.3.E-05       | <i>Sult2a6</i>  | NM_001081325      |
| A_55_P2044653    | 61.0        | 1.4.E-05       | <i>Cyp2b10</i>  | NM_009999         |
| A_52_P293682     | 56.8        | 2.2.E-03       | <i>Sult2a7</i>  | NM_001184981      |
| A_52_P289091     | 55.6        | 4.3.E-04       | <i>Cyp2b13</i>  | NM_007813         |
| A_55_P2034531    | 51.3        | 5.6.E-05       | N/A             | N/A               |
| A_52_P256914     | 45.2        | 1.9.E-05       | <i>Cyp2b9</i>   | NM_010000         |
| A_52_P493477     | 42.0        | 1.2.E-03       | <i>Serpib1c</i> | NM_173051         |
| A_55_P2060138    | 33.5        | 1.1.E-03       | <i>Cyp2a22</i>  | NM_001101467      |
| A_55_P2165091    | 32.7        | 1.5.E-03       | <i>Acnat2</i>   | NM_145368         |
| A_55_P2075263    | 32.6        | 1.5.E-03       | <i>Acnat2</i>   | NM_145368         |
| A_55_P1962516    | 32.4        | 2.5.E-04       | <i>Fam19a2</i>  | NM_182807         |
| A_55_P2408588    | 29.7        | 8.4.E-04       | <i>Arntl</i>    | NM_007489         |
| A_51_P269792     | 28.2        | 4.9.E-03       | <i>Rad5111</i>  | NM_009014         |
| A_55_P2098175    | 25.9        | 4.3.E-04       | <i>Olf701</i>   | NM_028910         |
| A_51_P362066     | 25.1        | 2.1.E-03       | <i>Chi3l1</i>   | NM_007695         |
| A_51_P461067     | 24.3        | 1.3.E-03       | N/A             | X87228            |
| A_55_P1955861    | 23.3        | 1.5.E-03       | <i>Cux2</i>     | NM_007804         |
| A_55_P2071906    | 23.2        | 6.1.E-05       | N/A             | N/A               |
| A_51_P386648     | 22.7        | 5.5.E-03       | <i>Glod5</i>    | NM_027227         |
| A_55_P2030524    | 21.6        | 1.7.E-03       | <i>Vldlr</i>    | NM_013703         |
| A_66_P107818     | 21.2        | 6.6.E-04       | <i>Gdf3</i>     | NM_008108         |
| A_55_P2006008    | 20.7        | 2.1.E-03       | <i>Serpib1a</i> | NM_025429         |

|               |      |          |                      |              |
|---------------|------|----------|----------------------|--------------|
| A_52_P574668  | 19.9 | 1.0.E-03 | <i>Nt5e</i>          | NM_011851    |
| A_51_P485421  | 18.8 | 1.8.E-03 | <i>N/A</i>           | AK088666     |
| A_55_P2060897 | 18.7 | 1.9.E-04 | <i>N/A</i>           | AM910933     |
| A_55_P2038347 | 18.5 | 8.1.E-03 | <i>Acot3</i>         | NM_134246    |
| A_55_P2059931 | 18.0 | 3.4.E-04 | <i>Prom1</i>         | NM_001163577 |
| A_55_P2069907 | 15.3 | 1.9.E-02 | <i>Acot3</i>         | NM_134246    |
| A_51_P480119  | 15.3 | 5.2.E-04 | <i>Prelid2</i>       | NM_029942    |
| A_52_P113537  | 14.4 | 4.2.E-03 | <i>Xist</i>          | NR_001463    |
| A_51_P469951  | 14.3 | 7.9.E-04 | <i>Srgap3</i>        | NM_080448    |
| A_55_P1999162 | 14.2 | 4.2.E-03 | <i>N/A</i>           | XR_030524    |
| A_55_P2008437 | 14.1 | 3.8.E-03 | <i>Cdkn2a</i>        | NM_009877    |
| A_52_P122649  | 14.0 | 2.5.E-03 | <i>Dmrta1</i>        | NM_175647    |
| A_52_P235347  | 13.0 | 1.5.E-02 | <i>Fgf21</i>         | NM_020013    |
| A_55_P1978666 | 13.0 | 4.2.E-04 | <i>Sybu</i>          | NM_176998    |
| A_55_P1980214 | 12.9 | 4.6.E-03 | <i>N/A</i>           | <i>N/A</i>   |
| A_51_P212782  | 12.1 | 1.9.E-02 | <i>Il1b</i>          | NM_008361    |
| A_55_P2151609 | 11.9 | 2.3.E-03 | <i>Sorl1</i>         | NM_011436    |
| A_55_P2001780 | 11.6 | 1.5.E-03 | <i>Cyp3a41b</i>      | NM_001105159 |
| A_55_P1998471 | 11.3 | 5.4.E-03 | <i>S100a9</i>        | NM_009114    |
| A_51_P271984  | 11.2 | 4.2.E-03 | <i>Tmem45b</i>       | NM_144936    |
| A_51_P256827  | 10.7 | 5.9.E-03 | <i>S100a8</i>        | NM_013650    |
| A_55_P2058028 | 10.6 | 7.7.E-03 | <i>N/A</i>           | X79554       |
| A_65_P07626   | 10.4 | 1.9.E-03 | <i>N/A</i>           | U30234       |
| A_51_P150710  | 10.1 | 1.2.E-03 | <i>Igj</i>           | NM_152839    |
| A_55_P2126850 | 10.0 | 3.8.E-03 | <i>Nudt11</i>        | NM_021431    |
| A_51_P440047  | 9.7  | 5.1.E-04 | <i>1110067D22Ril</i> | NM_173752    |
| A_52_P483336  | 9.6  | 2.4.E-03 | <i>Ms4a1</i>         | NM_007641    |
| A_52_P21486   | 9.6  | 1.2.E-02 | <i>Hamp2</i>         | NM_183257    |
| A_52_P230167  | 9.3  | 3.2.E-03 | <i>Setbp1</i>        | NM_053099    |
| A_66_P122699  | 9.1  | 1.3.E-03 | <i>Cux2</i>          | AK139469     |
| A_52_P301602  | 9.0  | 4.8.E-02 | <i>Gm4794</i>        | NM_001101452 |
| A_51_P350453  | 8.8  | 6.2.E-03 | <i>Pdk4</i>          | NM_013743    |
| A_52_P71686   | 8.7  | 6.5.E-03 | <i>Atp6v0d2</i>      | NM_175406    |
| A_55_P2145059 | 8.4  | 3.5.E-03 | <i>Gbp5</i>          | AF487898     |
| A_51_P248666  | 8.4  | 1.3.E-02 | <i>Cd274</i>         | NM_021893    |
| A_51_P249302  | 8.4  | 5.2.E-04 | <i>Abcd2</i>         | NM_011994    |
| A_55_P1983448 | 8.2  | 2.9.E-03 | <i>S100a4</i>        | NM_011311    |
| A_55_P1973417 | 8.2  | 2.4.E-03 | <i>N/A</i>           | BC048373     |
| A_52_P457567  | 8.1  | 4.7.E-03 | <i>Slc4a4</i>        | NM_018760    |
| A_55_P2019601 | 8.1  | 2.1.E-03 | <i>Csprs</i>         | NM_033616    |
| A_55_P2156062 | 8.1  | 7.9.E-04 | <i>Pick1</i>         | AK090155     |



|               |     |          |                     |              |
|---------------|-----|----------|---------------------|--------------|
| A_55_P1987406 | 8.0 | 5.1.E-03 | <i>N/A</i>          | AY679096     |
| A_51_P467448  | 7.9 | 6.1.E-03 | <i>Pif1</i>         | NM_172453    |
| A_51_P204080  | 7.9 | 4.2.E-03 | <i>Hk2</i>          | NM_013820    |
| A_52_P425839  | 7.9 | 4.6.E-03 | <i>Retnlg</i>       | NM_181596    |
| A_51_P477121  | 7.9 | 3.8.E-03 | <i>Pmaip1</i>       | NM_021451    |
| A_55_P1963134 | 7.7 | 6.5.E-03 | <i>N/A</i>          | <i>N/A</i>   |
| A_66_P124179  | 7.7 | 5.5.E-03 | <i>Atp6v0d2</i>     | NM_175406    |
| A_51_P281333  | 7.6 | 8.4.E-04 | <i>St3gal6</i>      | NM_018784    |
| A_55_P1961736 | 7.4 | 2.1.E-03 | <i>Rcan2</i>        | NM_207649    |
| A_51_P311958  | 7.3 | 5.4.E-04 | <i>Orm3</i>         | NM_013623    |
| A_55_P2179027 | 7.3 | 1.0.E-02 | <i>Gem</i>          | NM_010276    |
| A_52_P468564  | 7.2 | 1.2.E-03 | <i>Cyp2c38</i>      | NM_010002    |
| A_51_P488196  | 7.2 | 4.6.E-03 | <i>Bmper</i>        | NM_028472    |
| A_55_P2080210 | 7.2 | 2.5.E-03 | <i>Crisp4</i>       | NM_030033    |
| A_55_P1982186 | 7.1 | 5.7.E-03 | <i>Sgsm1</i>        | NM_172718    |
| A_55_P2091191 | 6.8 | 5.3.E-03 | <i>Slc28a2</i>      | NM_172980    |
| A_66_P109397  | 6.8 | 7.4.E-03 | <i>Cdh19</i>        | NM_001081386 |
| A_55_P2058040 | 6.8 | 8.9.E-03 | <i>N/A</i>          | X06519       |
| A_51_P509573  | 6.7 | 2.4.E-03 | <i>Ccl4</i>         | NM_013652    |
| A_55_P2137688 | 6.7 | 4.2.E-03 | <i>Cga</i>          | NM_009889    |
| A_52_P449871  | 6.6 | 2.5.E-03 | <i>Id4</i>          | NM_031166    |
| A_55_P2044143 | 6.5 | 3.0.E-03 | <i>Loxl4</i>        | NM_001164311 |
| A_55_P1971076 | 6.4 | 4.1.E-03 | <i>Atp11a</i>       | NM_015804    |
| A_51_P414879  | 6.4 | 7.1.E-03 | <i>N/A</i>          | S60874       |
| A_55_P2174836 | 6.4 | 3.1.E-03 | <i>Vldlr</i>        | NM_013703    |
| A_55_P2033041 | 6.4 | 3.5.E-03 | <i>Sirpb1b</i>      | NM_001173460 |
| A_51_P375146  | 6.4 | 1.5.E-03 | <i>Cd36</i>         | NM_007643    |
| A_51_P238576  | 6.4 | 4.5.E-03 | <i>Cyp4a14</i>      | NM_007822    |
| A_52_P402786  | 6.3 | 2.5.E-03 | <i>Prom1</i>        | NM_008935    |
| A_51_P247637  | 6.2 | 1.6.E-03 | <i>Rnf144a</i>      | NM_080563    |
| A_52_P16232   | 6.1 | 7.8.E-03 | <i>Gabbr1</i>       | NM_019439    |
| A_55_P2064771 | 6.0 | 4.0.E-03 | <i>Ly6c1</i>        | NM_010741    |
| A_55_P2083609 | 6.0 | 4.1.E-03 | <i>Dkk3</i>         | NM_015814    |
| A_55_P2103011 | 5.9 | 2.6.E-03 | <i>Sema4d</i>       | NM_013660    |
| A_55_P2055158 | 5.9 | 4.7.E-03 | <i>Apod</i>         | NM_007470    |
| A_51_P304683  | 5.9 | 4.2.E-03 | <i>Clpx</i>         | NM_011802    |
| A_52_P244803  | 5.9 | 1.1.E-02 | <i>D630033O11Ri</i> | AK052711     |
| A_55_P2296088 | 5.9 | 1.1.E-02 | <i>Sp3</i>          | NM_001018042 |
| A_55_P2063508 | 5.9 | 4.2.E-03 | <i>Gm4131</i>       | BY732610     |
| A_55_P1978033 | 5.8 | 2.5.E-03 | <i>N/A</i>          | HQ015080     |
| A_66_P114381  | 5.8 | 3.8.E-03 | <i>Ypel2</i>        | NM_001005341 |

|               |     |          |                     |              |
|---------------|-----|----------|---------------------|--------------|
| A_55_P1995512 | 5.8 | 1.1.E-02 | <i>Tmem139</i>      | NM_175408    |
| A_55_P2130535 | 5.8 | 3.5.E-03 | <i>Dnmt3b</i>       | NM_001003961 |
| A_52_P413947  | 5.8 | 1.4.E-03 | <i>Mthfr</i>        | NM_010840    |
| A_55_P2070869 | 5.7 | 2.1.E-03 | <i>Lcn2</i>         | NM_008491    |
| A_51_P386899  | 5.6 | 7.3.E-03 | <i>Mfsd7c</i>       | NM_145447    |
| A_52_P398925  | 5.6 | 4.7.E-03 | <i>Stfa2l1</i>      | NM_173869    |
| A_55_P2082929 | 5.6 | 8.9.E-03 | <i>H2-Ob</i>        | NM_010389    |
| A_55_P2001274 | 5.5 | 4.0.E-03 | N/A                 | AY114394     |
| A_51_P509679  | 5.5 | 7.3.E-03 | N/A                 | XM_003085465 |
| A_55_P1995537 | 5.4 | 3.9.E-02 | <i>Mpo</i>          | NM_010824    |
| A_55_P1993807 | 5.4 | 4.9.E-03 | <i>Nudt10</i>       | NM_001031664 |
| A_66_P139387  | 5.4 | 2.6.E-03 | <i>Prlr</i>         | NM_011169    |
| A_55_P2066505 | 5.4 | 1.8.E-02 | <i>Mpo</i>          | AY500847     |
| A_55_P1965836 | 5.4 | 6.7.E-03 | <i>Crebbp</i>       | NM_001025432 |
| A_55_P1977850 | 5.4 | 1.2.E-03 | <i>Sall1</i>        | NM_021390    |
| A_52_P329367  | 5.3 | 4.6.E-03 | <i>Chka</i>         | NM_001025566 |
| A_55_P2112360 | 5.2 | 7.0.E-03 | <i>Arhgap17</i>     | NM_144529    |
| A_55_P2041614 | 5.2 | 7.9.E-03 | <i>Cerkl</i>        | NM_001048176 |
| A_66_P130887  | 5.2 | 1.2.E-02 | <i>Pcdh18</i>       | NM_130448    |
| A_55_P2161055 | 5.2 | 6.6.E-03 | <i>Trp63</i>        | NM_001127261 |
| A_55_P2186220 | 5.1 | 2.1.E-03 | N/A                 | XM_001472058 |
| A_51_P142923  | 5.1 | 9.2.E-03 | <i>Chka</i>         | NM_013490    |
| A_55_P2125786 | 5.0 | 1.2.E-02 | <i>Lrrc8e</i>       | NM_028175    |
| A_51_P286737  | 5.0 | 5.7.E-03 | <i>Ccl2</i>         | NM_011333    |
| A_55_P2186978 | 5.0 | 1.5.E-02 | N/A                 | U19317       |
| A_55_P2145224 | 4.9 | 3.8.E-03 | N/A                 | AF290571     |
| A_55_P2049771 | 4.9 | 2.3.E-03 | N/A                 | N/A          |
| A_55_P2183369 | 4.8 | 7.4.E-03 | N/A                 | U18577       |
| A_55_P2058023 | 4.8 | 1.4.E-02 | N/A                 | U18569       |
| A_55_P1962224 | 4.8 | 8.6.E-03 | <i>Afap1l2</i>      | NM_146102    |
| A_51_P378789  | 4.8 | 6.4.E-03 | <i>Cxcl13</i>       | NM_018866    |
| A_55_P1988994 | 4.7 | 5.5.E-03 | N/A                 | AY816714     |
| A_51_P345649  | 4.7 | 2.5.E-03 | <i>Pdgfra</i>       | NM_011058    |
| A_52_P420500  | 4.7 | 1.1.E-02 | <i>Cry1</i>         | NM_007771    |
| A_51_P231320  | 4.7 | 4.4.E-02 | <i>Mmp8</i>         | NM_008611    |
| A_51_P267354  | 4.7 | 2.5.E-03 | <i>Lrfn3</i>        | NM_175478    |
| A_55_P2058550 | 4.7 | 4.7.E-03 | <i>Raet1c</i>       | NM_009018    |
| A_55_P2006499 | 4.7 | 8.9.E-03 | <i>Esrrg</i>        | NM_011935    |
| A_51_P199135  | 4.7 | 2.9.E-02 | <i>Cd83</i>         | NM_009856    |
| A_66_P122086  | 4.7 | 5.6.E-03 | <i>9030619P08Ri</i> | NM_001039720 |
| A_55_P2077901 | 4.7 | 2.0.E-03 | <i>Cd2</i>          | NM_013486    |

|               |     |          |                  |              |
|---------------|-----|----------|------------------|--------------|
| A_51_P440743  | 4.6 | 1.0.E-02 | <i>Celsr1</i>    | NM_009886    |
| A_55_P2010271 | 4.6 | 7.9.E-03 | <i>Samsn1</i>    | NM_023380    |
| A_55_P1983152 | 4.6 | 3.9.E-03 | <i>Gramd4</i>    | NM_001205353 |
| A_66_P101261  | 4.6 | 6.3.E-03 | <i>Gm3367</i>    | BX517038     |
| A_51_P507801  | 4.6 | 1.0.E-02 | <i>F13a1</i>     | NM_028784    |
| A_55_P2178510 | 4.6 | 9.3.E-03 | <i>Mc3r</i>      | NM_008561    |
| A_52_P237077  | 4.6 | 8.7.E-03 | <i>Esr1</i>      | NM_007956    |
| A_51_P423709  | 4.6 | 1.5.E-02 | <i>Fam84a</i>    | NM_029007    |
| A_55_P1956418 | 4.5 | 1.2.E-02 | <i>Efr3b</i>     | NM_001082483 |
| A_55_P1971074 | 4.5 | 3.3.E-03 | <i>Atp11a</i>    | NM_015804    |
| A_55_P1964282 | 4.5 | 4.2.E-03 | <i>Gm1078</i>    | NM_001200041 |
| A_65_P03874   | 4.5 | 9.1.E-03 | <i>Nav2</i>      | NM_175272    |
| A_52_P93910   | 4.4 | 4.7.E-03 | <i>Nrp2</i>      | NM_001077403 |
| A_55_P1982902 | 4.4 | 4.7.E-03 | <i>Tceal3</i>    | NM_001029978 |
| A_55_P2072005 | 4.4 | 4.7.E-03 | <i>Ctsc</i>      | AK152524     |
| A_52_P60353   | 4.4 | 4.6.E-03 | <i>Greb1l</i>    | NM_001083628 |
| A_55_P1968433 | 4.4 | 4.2.E-03 | <i>Agpat9</i>    | NM_172715    |
| A_55_P2043627 | 4.3 | 7.0.E-03 | <i>Fam89a</i>    | NM_001081120 |
| A_52_P15388   | 4.3 | 7.9.E-03 | <i>Ltf</i>       | NM_008522    |
| A_52_P413584  | 4.3 | 5.0.E-03 | <i>Nrip1</i>     | AK078829     |
| A_55_P2074521 | 4.3 | 2.5.E-02 | <i>Psg28</i>     | NM_054063    |
| A_51_P229498  | 4.3 | 1.5.E-02 | <i>Lrfr2</i>     | NM_027452    |
| A_55_P2127387 | 4.3 | 2.4.E-02 | <i>Olfir1023</i> | NM_146587    |
| A_51_P302358  | 4.3 | 5.5.E-03 | <i>Ltb</i>       | NM_008518    |
| A_51_P169516  | 4.2 | 9.2.E-03 | <i>Ppp1r3d</i>   | NM_001085501 |
| A_52_P140005  | 4.2 | 8.7.E-03 | <i>Nipal1</i>    | NM_001081205 |
| A_55_P2168048 | 4.2 | 1.6.E-02 | <i>Gramd4</i>    | NM_001205353 |
| A_55_P1991079 | 4.1 | 4.7.E-03 | <i>Phf21b</i>    | NM_001081166 |
| A_51_P257885  | 4.1 | 4.0.E-03 | <i>Mmd2</i>      | NM_175217    |
| A_51_P483576  | 4.1 | 3.0.E-03 | N/A              | AF138742     |
| A_55_P2048779 | 4.1 | 9.5.E-03 | <i>Fam84b</i>    | NM_001162926 |
| A_51_P315042  | 4.1 | 8.9.E-03 | <i>Avpr1a</i>    | NM_016847    |
| A_55_P2107207 | 4.1 | 7.0.E-03 | <i>Gpr137b</i>   | AK009736     |
| A_55_P2058433 | 4.1 | 6.4.E-03 | <i>Cyp2c68</i>   | NM_001039555 |
| A_52_P321140  | 4.1 | 4.2.E-02 | <i>Defb1</i>     | NM_007843    |
| A_55_P1960148 | 4.0 | 1.2.E-02 | N/A              | XM_001472091 |
| A_51_P172054  | 4.0 | 1.5.E-03 | <i>Gas6</i>      | NM_019521    |
| A_55_P1976743 | 4.0 | 1.9.E-02 | N/A              | CJ206873     |
| A_52_P213483  | 4.0 | 7.2.E-03 | N/A              | AF045501     |
| A_65_P19089   | 4.0 | 6.3.E-03 | <i>Esrrg</i>     | NM_011935    |
| A_55_P1985070 | 4.0 | 5.5.E-03 | <i>Robo1</i>     | NM_019413    |

|               |     |          |                      |              |
|---------------|-----|----------|----------------------|--------------|
| A_55_P1969650 | 4.0 | 5.0.E-03 | <i>Rasgrp1</i>       | NM_011246    |
| A_55_P2102936 | 3.9 | 1.3.E-02 | <i>Pnrc1</i>         | NM_001033225 |
| A_55_P2090874 | 3.9 | 1.3.E-02 | <i>Ysk4</i>          | NM_011737    |
| A_51_P290074  | 3.9 | 1.3.E-02 | <i>Fabp7</i>         | NM_021272    |
| A_55_P2047589 | 3.9 | 8.1.E-03 | <i>N/A</i>           | X75105       |
| A_55_P2002963 | 3.9 | 2.4.E-03 | <i>Coro1a</i>        | NM_009898    |
| A_51_P439876  | 3.9 | 4.6.E-03 | <i>Map4k4</i>        | NM_008696    |
| A_55_P1965045 | 3.9 | 1.5.E-02 | <i>Slc47a2</i>       | NM_001033542 |
| A_55_P2079390 | 3.9 | 9.3.E-03 | <i>4930579G24Rii</i> | NM_029482    |
| A_51_P343517  | 3.9 | 5.1.E-03 | <i>Ly6d</i>          | NM_010742    |
| A_52_P54280   | 3.9 | 1.3.E-02 | <i>Adck3</i>         | NM_023341    |
| A_52_P294510  | 3.9 | 7.3.E-03 | <i>Fgl1</i>          | BC029734     |
| A_66_P106148  | 3.8 | 8.6.E-03 | <i>Raet1c</i>        | NM_009018    |
| A_55_P1967286 | 3.8 | 7.7.E-03 | <i>N/A</i>           | XM_357633    |
| A_55_P2131060 | 3.8 | 5.4.E-03 | <i>9530053H05Rii</i> | AK020608     |
| A_65_P15245   | 3.8 | 1.0.E-02 | <i>Nrp2</i>          | NM_001077406 |
| A_51_P136294  | 3.8 | 1.7.E-02 | <i>Ms4a4b</i>        | NM_021718    |
| A_52_P195839  | 3.8 | 6.3.E-03 | <i>Ctsc</i>          | NM_009982    |
| A_55_P2015670 | 3.8 | 5.5.E-03 | <i>Itga6</i>         | NM_008397    |
| A_51_P229602  | 3.8 | 8.7.E-03 | <i>Plxna2</i>        | NM_008882    |
| A_65_P08239   | 3.8 | 1.9.E-02 | <i>Mef2a</i>         | NM_001033713 |
| A_52_P458000  | 3.8 | 4.7.E-03 | <i>AI467606</i>      | NM_178901    |
| A_51_P286748  | 3.8 | 1.1.E-02 | <i>Frzb</i>          | NM_011356    |
| A_52_P638459  | 3.7 | 8.3.E-03 | <i>Ccl5</i>          | NM_013653    |
| A_55_P1982291 | 3.7 | 1.8.E-02 | <i>Clca1</i>         | NM_009899    |
| A_55_P2017914 | 3.7 | 6.1.E-03 | <i>Csf1</i>          | NM_001113530 |
| A_51_P498631  | 3.7 | 9.5.E-03 | <i>Dfna5</i>         | NM_018769    |
| A_51_P303424  | 3.7 | 1.0.E-02 | <i>Itgax</i>         | NM_021334    |
| A_51_P424810  | 3.7 | 1.1.E-02 | <i>Ncapg2</i>        | NM_133762    |
| A_52_P357611  | 3.7 | 5.8.E-03 | <i>Neu3</i>          | NM_016720    |
| A_52_P335064  | 3.7 | 9.2.E-03 | <i>Mustn1</i>        | NM_181390    |
| A_55_P2017362 | 3.7 | 6.7.E-03 | <i>BC068157</i>      | NM_207203    |
| A_55_P1955147 | 3.7 | 4.3.E-03 | <i>Camk1d</i>        | NM_177343    |
| A_55_P2059110 | 3.7 | 9.3.E-03 | <i>Skap1</i>         | NM_001033186 |
| A_55_P2102350 | 3.6 | 3.6.E-03 | <i>Stambpl1</i>      | NM_029682    |
| A_51_P151732  | 3.6 | 1.1.E-02 | <i>Pkp1</i>          | NM_019645    |
| A_55_P1993001 | 3.6 | 1.1.E-02 | <i>N/A</i>           | AF303868     |
| A_55_P2035320 | 3.6 | 7.6.E-03 | <i>Nfil3</i>         | NM_017373    |
| A_55_P2095039 | 3.6 | 2.0.E-02 | <i>A330049M08Ri</i>  | NM_001168500 |
| A_52_P57622   | 3.6 | 7.5.E-03 | <i>Acss3</i>         | NM_198636    |
| A_55_P2111322 | 3.6 | 7.3.E-03 | <i>LOC100505358</i>  | XR_105809    |

|               |     |          |              |              |
|---------------|-----|----------|--------------|--------------|
| A_66_P100268  | 3.6 | 2.7.E-02 | N/A          | AK087888     |
| A_51_P453111  | 3.6 | 4.6.E-03 | Hexb         | NM_010422    |
| A_52_P525183  | 3.6 | 7.9.E-03 | Acot2        | NM_134188    |
| A_55_P1996983 | 3.6 | 9.5.E-03 | 4930430D24Ri | NM_001034856 |
| A_51_P314397  | 3.6 | 4.0.E-03 | Crip2        | NM_024223    |
| A_55_P1988148 | 3.6 | 5.5.E-03 | Tox          | AK162821     |
| A_55_P2045741 | 3.6 | 5.4.E-03 | Fyb          | NM_011815    |
| A_66_P128918  | 3.6 | 1.7.E-02 | Hacl1        | NM_019975    |
| A_66_P119034  | 3.5 | 3.5.E-03 | Pla2g7       | NM_013737    |
| A_55_P2056542 | 3.5 | 2.1.E-02 | Nin          | NM_008697    |
| A_51_P111612  | 3.5 | 1.4.E-02 | Arrdc4       | NM_001042592 |
| A_52_P340073  | 3.5 | 8.6.E-03 | Efnb2        | NM_010111    |
| A_52_P447439  | 3.5 | 6.1.E-03 | Prss43       | NM_199471    |
| A_66_P121446  | 3.5 | 3.0.E-02 | Gm7969       | XM_982175    |
| A_55_P2340448 | 3.5 | 4.1.E-03 | B230114P17Ri | AK045415     |
| A_55_P2181271 | 3.5 | 7.1.E-03 | Nhsl2        | NM_001163610 |
| A_55_P2350022 | 3.5 | 3.2.E-02 | Akap6        | NM_198111    |
| A_66_P107231  | 3.5 | 4.8.E-02 | Loxl4        | NM_001164311 |
| A_52_P502849  | 3.5 | 4.6.E-03 | N/A          | BC108385     |
| A_55_P1968600 | 3.5 | 7.2.E-03 | N/A          | N/A          |
| A_66_P105032  | 3.5 | 1.0.E-02 | Gm13889      | NM_001145034 |
| A_51_P515965  | 3.5 | 3.0.E-03 | Nfe2         | NM_008685    |
| A_55_P2030756 | 3.5 | 1.5.E-02 | Nedd4l       | NM_031881    |
| A_52_P165455  | 3.5 | 4.9.E-02 | Wwp1         | NM_177327    |
| A_51_P110381  | 3.5 | 7.4.E-03 | Cd207        | NM_144943    |
| A_55_P2115955 | 3.5 | 1.3.E-02 | Raet1e       | NM_198193    |
| A_55_P1982201 | 3.5 | 2.4.E-03 | Sgsm2        | NM_197943    |
| A_52_P429876  | 3.4 | 1.3.E-02 | Tbx20        | NM_194263    |
| A_51_P386539  | 3.4 | 1.4.E-02 | Rnf125       | NM_026301    |
| A_55_P1973033 | 3.4 | 7.8.E-03 | Ltbp1        | NM_019919    |
| A_55_P2137077 | 3.4 | 4.7.E-03 | N/A          | AK139759     |
| A_55_P2176266 | 3.4 | 8.8.E-03 | N/A          | N/A          |
| A_55_P2169669 | 3.4 | 4.3.E-03 | Csf1         | NM_001113530 |
| A_55_P2033362 | 3.4 | 7.3.E-03 | Egr2         | NM_010118    |
| A_55_P2004447 | 3.4 | 8.0.E-03 | Fgl1         | NM_145594    |
| A_51_P359603  | 3.4 | 1.7.E-02 | Itgb7        | NM_013566    |
| A_55_P2181928 | 3.4 | 8.5.E-03 | Slc45a3      | NM_145977    |
| A_55_P1957459 | 3.4 | 1.9.E-02 | Lilrb4       | NM_013532    |
| A_66_P139683  | 3.4 | 1.2.E-02 | Zbp1         | NM_021394    |
| A_55_P2071970 | 3.4 | 1.3.E-02 | Nav2         | NM_175272    |
| A_51_P164296  | 3.3 | 6.3.E-03 | Adamdec1     | NM_021475    |

|               |     |          |                     |              |
|---------------|-----|----------|---------------------|--------------|
| A_55_P1965659 | 3.3 | 2.2.E-02 | <i>Havcr2</i>       | NM_134250    |
| A_66_P119376  | 3.3 | 4.1.E-03 | <i>Kctd12</i>       | NM_177715    |
| A_55_P2192662 | 3.3 | 1.1.E-02 | <i>Lepr</i>         | NM_001122899 |
| A_52_P765764  | 3.3 | 1.9.E-02 | N/A                 | AF316510     |
| A_52_P102248  | 3.3 | 1.9.E-02 | <i>Mex3b</i>        | NM_175366    |
| A_55_P2334058 | 3.3 | 2.1.E-02 | <i>4930401C15Ri</i> | AK015032     |
| A_51_P391454  | 3.3 | 9.1.E-03 | <i>Ii7</i>          | NM_008371    |
| A_51_P121915  | 3.3 | 6.5.E-03 | <i>BC089597</i>     | NM_145424    |
| A_55_P2175146 | 3.3 | 2.8.E-02 | N/A                 | N/A          |
| A_52_P305053  | 3.3 | 1.1.E-02 | <i>B330016D10Ri</i> | NR_030695    |
| A_55_P2036007 | 3.3 | 4.6.E-03 | <i>Rai2</i>         | NM_198409    |
| A_51_P368496  | 3.3 | 6.5.E-03 | <i>Tmem98</i>       | NM_029537    |
| A_55_P2175579 | 3.3 | 1.2.E-02 | <i>Olf1466</i>      | NM_146694    |
| A_55_P2098598 | 3.3 | 4.7.E-03 | <i>Btg1</i>         | NM_007569    |
| A_55_P2008016 | 3.3 | 1.3.E-02 | <i>Armc3</i>        | NM_001081083 |
| A_51_P157083  | 3.3 | 3.9.E-03 | <i>Gas1</i>         | NM_008086    |
| A_51_P317505  | 3.3 | 1.5.E-02 | <i>Nat1</i>         | NM_008673    |
| A_55_P1978681 | 3.3 | 3.0.E-02 | <i>Tspan8</i>       | NM_146010    |
| A_55_P2039044 | 3.3 | 4.6.E-03 | <i>Cyp3a59</i>      | NM_001105160 |
| A_52_P386627  | 3.3 | 6.6.E-03 | <i>Irak3</i>        | NM_028679    |
| A_55_P2072661 | 3.2 | 4.2.E-03 | <i>Prex1</i>        | NM_177782    |
| A_51_P176156  | 3.2 | 1.4.E-02 | <i>LOC10003894</i>  | NM_001173459 |
| A_51_P446512  | 3.2 | 2.6.E-02 | <i>2310016G11Ri</i> | XM_001003421 |
| A_55_P2137611 | 3.2 | 1.9.E-02 | <i>Irgm2</i>        | NM_019440    |
| A_51_P479818  | 3.2 | 1.3.E-02 | <i>Lonrf3</i>       | NM_028894    |
| A_51_P222475  | 3.2 | 4.2.E-03 | <i>Ehbp111</i>      | NM_053252    |
| A_55_P2003221 | 3.2 | 2.1.E-02 | <i>Gimap3</i>       | NM_031247    |
| A_52_P594756  | 3.2 | 4.5.E-03 | <i>Asb4</i>         | NM_023048    |
| A_55_P1990495 | 3.2 | 4.5.E-03 | <i>Stat5a</i>       | NM_011488    |
| A_55_P2045451 | 3.2 | 1.3.E-02 | <i>Olf1906</i>      | NM_146803    |
| A_52_P215170  | 3.2 | 1.5.E-02 | <i>Acot4</i>        | NM_134247    |
| A_52_P161488  | 3.2 | 5.3.E-03 | <i>Clec4e</i>       | NM_019948    |
| A_52_P458279  | 3.2 | 3.6.E-03 | <i>Prlr</i>         | NM_011169    |
| A_55_P1974845 | 3.2 | 6.1.E-03 | <i>Pde1a</i>        | NM_001009978 |
| A_55_P2123841 | 3.2 | 1.4.E-02 | <i>Zfhx4</i>        | NM_030708    |
| A_51_P112355  | 3.2 | 2.2.E-02 | <i>Igtp</i>         | NM_018738    |
| A_55_P2133225 | 3.2 | 3.9.E-03 | <i>Mmgt2</i>        | NM_175002    |
| A_55_P2164085 | 3.2 | 1.9.E-02 | <i>Raet1a</i>       | NM_009016    |
| A_55_P2257670 | 3.2 | 5.5.E-03 | <i>A030001D16Ri</i> | AK037146     |
| A_55_P2003483 | 3.2 | 7.9.E-03 | <i>Gldc</i>         | NM_138595    |
| A_52_P330289  | 3.2 | 1.3.E-02 | <i>Inpp4b</i>       | NM_001024617 |

|               |     |          |                     |              |
|---------------|-----|----------|---------------------|--------------|
| A_52_P382149  | 3.2 | 2.9.E-02 | <i>Cyp26a1</i>      | NM_007811    |
| A_51_P108459  | 3.2 | 1.5.E-02 | <i>Gpr65</i>        | NM_008152    |
| A_51_P181565  | 3.1 | 9.4.E-03 | <i>Hbegf</i>        | NM_010415    |
| A_55_P2013236 | 3.1 | 2.5.E-02 | <i>S100g</i>        | NM_009789    |
| A_55_P2148071 | 3.1 | 1.2.E-02 | <i>N/A</i>          | N/A          |
| A_55_P2185178 | 3.1 | 2.4.E-02 | <i>Tmem28</i>       | N/A          |
| A_51_P215077  | 3.1 | 4.6.E-03 | <i>Mgst3</i>        | NM_025569    |
| A_55_P1984830 | 3.1 | 1.0.E-02 | <i>Fgl1</i>         | NM_145594    |
| A_55_P1955325 | 3.1 | 1.2.E-02 | <i>Zfp820</i>       | NM_029281    |
| A_52_P298165  | 3.1 | 3.3.E-02 | <i>N/A</i>          | XR_106194    |
| A_55_P2061779 | 3.1 | 7.3.E-03 | <i>Zfp456</i>       | NM_001001186 |
| A_51_P235801  | 3.1 | 1.7.E-02 | <i>Zfp3611</i>      | NM_007564    |
| A_55_P1956179 | 3.1 | 2.7.E-02 | <i>Git2</i>         | NM_019834    |
| A_55_P1959228 | 3.1 | 1.5.E-02 | <i>Slc4a4</i>       | NM_018760    |
| A_55_P2014882 | 3.1 | 8.6.E-03 | <i>Dhrs9</i>        | NM_175512    |
| A_51_P144349  | 3.1 | 9.1.E-03 | <i>Dtx4</i>         | NM_172442    |
| A_55_P2043718 | 3.1 | 1.4.E-02 | <i>Cacna1f</i>      | NM_019582    |
| A_55_P2119772 | 3.1 | 1.2.E-02 | <i>Scn3a</i>        | NM_018732    |
| A_55_P2170034 | 3.1 | 7.3.E-03 | <i>Rgl1</i>         | NM_016846    |
| A_55_P2150734 | 3.0 | 1.5.E-02 | <i>N/A</i>          | JF690609     |
| A_55_P2194958 | 3.0 | 1.6.E-02 | <i>Nfia</i>         | NM_010905    |
| A_51_P152797  | 3.0 | 2.0.E-02 | <i>2810039B14Ri</i> | XR_105719    |
| A_55_P2039541 | 3.0 | 1.1.E-02 | <i>Arhgap15</i>     | NM_153820    |
| A_55_P1969416 | 3.0 | 9.5.E-03 | <i>Sntg1</i>        | NM_027671    |
| A_55_P1967776 | 3.0 | 1.1.E-02 | <i>Slc4a4</i>       | NM_018760    |
| A_51_P286488  | 3.0 | 2.8.E-02 | <i>Ier3</i>         | NM_133662    |
| A_51_P151126  | 3.0 | 6.7.E-03 | <i>Cd52</i>         | NM_013706    |
| A_52_P476731  | 3.0 | 8.1.E-03 | <i>Fam110c</i>      | NM_027828    |
| A_55_P2052897 | 3.0 | 1.0.E-02 | <i>Arhgap30</i>     | NM_001005508 |
| A_55_P2081116 | 3.0 | 5.8.E-03 | <i>Fam89a</i>       | NM_001081120 |
| A_55_P2176325 | 3.0 | 8.9.E-03 | <i>Prex1</i>        | NM_177782    |
| A_52_P240542  | 3.0 | 4.6.E-02 | <i>Id2</i>          | NM_010496    |
| A_55_P1987186 | 3.0 | 2.6.E-02 | <i>Ttll9</i>        | NM_001083618 |
| A_55_P1957249 | 3.0 | 7.9.E-03 | <i>Pdgfrb</i>       | NM_001146268 |
| A_55_P2032966 | 3.0 | 4.7.E-03 | <i>Hmgcs1</i>       | NM_145942    |
| A_55_P2032388 | 3.0 | 1.6.E-02 | <i>Trim24</i>       | NM_145076    |
| A_66_P112305  | 3.0 | 1.5.E-02 | <i>Myo1f</i>        | NM_053214    |
| A_55_P2148171 | 3.0 | 1.9.E-02 | <i>A330049M08Ri</i> | NM_001168500 |
| A_51_P337125  | 3.0 | 1.3.E-02 | <i>Inpp5d</i>       | NM_010566    |
| A_51_P382849  | 3.0 | 5.3.E-03 | <i>Emb</i>          | NM_010330    |
| A_51_P352594  | 3.0 | 7.8.E-03 | <i>St5</i>          | NM_001001326 |

|               |     |          |                      |              |
|---------------|-----|----------|----------------------|--------------|
| A_55_P1972720 | 3.0 | 5.0.E-03 | <i>Pmm1</i>          | NM_013872    |
| A_51_P219888  | 3.0 | 7.3.E-03 | <i>Olfir599</i>      | NM_146731    |
| A_51_P497882  | 3.0 | 3.4.E-02 | <i>Creb3l4</i>       | NM_030080    |
| A_51_P265806  | 3.0 | 2.0.E-02 | <i>Clca2</i>         | NM_030601    |
| A_51_P292008  | 3.0 | 2.6.E-02 | <i>Gpx3</i>          | NM_008161    |
| A_55_P1954643 | 3.0 | 3.1.E-02 | <i>2310081J21Rik</i> | AK036683     |
| A_55_P2098734 | 3.0 | 9.9.E-03 | <i>Ttc21b</i>        | NM_001047604 |
| A_55_P1953723 | 3.0 | 1.4.E-02 | <i>Rab13</i>         | AK080805     |
| A_55_P2027653 | 3.0 | 8.3.E-03 | <i>Arhgap25</i>      | NM_001037727 |
| A_51_P424532  | 3.0 | 9.3.E-03 | <i>Vnn1</i>          | NM_011704    |
| A_55_P2018611 | 3.0 | 1.8.E-02 | <i>Igfbp7</i>        | NM_001159518 |
| A_55_P1978424 | 3.0 | 1.7.E-02 | <i>Bcl2a1d</i>       | NM_007536    |
| A_55_P2026748 | 3.0 | 1.0.E-02 | <i>Zmat1</i>         | NM_175446    |
| A_52_P48681   | 2.9 | 2.8.E-02 | <i>Cldn1</i>         | NM_016674    |
| A_51_P195506  | 2.9 | 7.7.E-03 | <i>Csf1</i>          | NM_007778    |
| A_51_P371051  | 2.9 | 5.3.E-03 | <i>Glipr1</i>        | NM_028608    |
| A_66_P107578  | 2.9 | 8.7.E-03 | <i>Nlrp9c</i>        | AY360472     |
| A_55_P1969506 | 2.9 | 1.5.E-02 | <i>Slc17a1</i>       | NM_009198    |
| A_55_P2072035 | 2.9 | 1.4.E-02 | <i>Thy1</i>          | NM_009382    |
| A_55_P1962661 | 2.9 | 1.2.E-02 | <i>Cyp2c67</i>       | NM_001024719 |
| A_55_P2094611 | 2.9 | 5.7.E-03 | N/A                  | N/A          |
| A_51_P446825  | 2.9 | 1.0.E-02 | <i>6430573F11Rik</i> | NM_176952    |
| A_55_P1978502 | 2.9 | 9.6.E-03 | <i>H2-Q1</i>         | NM_010390    |
| A_55_P2034655 | 2.9 | 7.8.E-03 | N/A                  | AK007918     |
| A_51_P335770  | 2.9 | 1.2.E-02 | <i>Afap1</i>         | NM_027373    |
| A_52_P350537  | 2.9 | 3.6.E-02 | <i>Mtmr11</i>        | NM_181409    |
| A_55_P1984391 | 2.9 | 4.0.E-02 | <i>Depdc5</i>        | NM_177786    |
| A_66_P106661  | 2.9 | 4.2.E-03 | <i>Slc7a1</i>        | NM_007513    |
| A_55_P1974095 | 2.9 | 5.0.E-03 | N/A                  | N/A          |
| A_55_P1975045 | 2.9 | 8.4.E-03 | <i>Sgcg</i>          | NM_011892    |
| A_55_P2093770 | 2.9 | 7.9.E-03 | N/A                  | N/A          |
| A_55_P2184897 | 2.9 | 9.1.E-03 | <i>Lbr</i>           | NM_133815    |
| A_55_P2096917 | 2.9 | 8.1.E-03 | <i>Mreg</i>          | NM_001005423 |
| A_51_P424338  | 2.9 | 5.4.E-03 | <i>Nqo1</i>          | NM_008706    |
| A_55_P2126940 | 2.9 | 2.1.E-02 | N/A                  | N/A          |
| A_55_P2027083 | 2.9 | 1.1.E-02 | <i>Kcnj10</i>        | NM_001039484 |
| A_52_P883557  | 2.9 | 2.3.E-02 | <i>Slc30a10</i>      | NM_001033286 |
| A_55_P2072284 | 2.9 | 1.2.E-02 | <i>6030429G01Ri</i>  | NM_001033548 |
| A_51_P451346  | 2.9 | 4.3.E-03 | <i>Klf6</i>          | NM_011803    |
| A_51_P364485  | 2.9 | 1.0.E-02 | <i>Tnfaip2</i>       | NM_009396    |
| A_52_P175028  | 2.9 | 7.7.E-03 | <i>Cachd1</i>        | AK046180     |



|               |     |          |                      |              |
|---------------|-----|----------|----------------------|--------------|
| A_55_P1956718 | 2.9 | 8.7.E-03 | <i>Rab38</i>         | NM_028238    |
| A_51_P114966  | 2.9 | 9.2.E-03 | <i>Prss37</i>        | NM_026317    |
| A_55_P2472435 | 2.9 | 2.3.E-02 | <i>Gbp3</i>          | NM_018734    |
| A_55_P1966194 | 2.9 | 9.5.E-03 | <i>Plek</i>          | NM_019549    |
| A_51_P339540  | 2.9 | 9.3.E-03 | <i>Cdkn1c</i>        | NM_009876    |
| A_55_P2004532 | 2.9 | 2.1.E-02 | <i>C530028O21Ri</i>  | NM_175696    |
| A_51_P459108  | 2.8 | 6.2.E-03 | <i>Insl6</i>         | NM_013754    |
| A_55_P2059586 | 2.8 | 3.3.E-02 | <i>Fmo3</i>          | NM_008030    |
| A_66_P101538  | 2.8 | 5.9.E-03 | <i>Lrrk2</i>         | NM_025730    |
| A_55_P1978186 | 2.8 | 6.4.E-03 | <i>BC089597</i>      | NM_145424    |
| A_52_P364130  | 2.8 | 6.3.E-03 | <i>Map3k14</i>       | NM_016896    |
| A_55_P2099014 | 2.8 | 6.5.E-03 | <i>N/A</i>           | AK143337     |
| A_51_P377856  | 2.8 | 5.7.E-03 | <i>Gstt3</i>         | NM_133994    |
| A_55_P2126695 | 2.8 | 1.9.E-02 | <i>N/A</i>           | XM_619114    |
| A_55_P2022743 | 2.8 | 1.9.E-02 | <i>Odz3</i>          | NM_001145937 |
| A_55_P2115836 | 2.8 | 5.1.E-03 | <i>Acnat1</i>        | NM_001164565 |
| A_51_P236267  | 2.8 | 1.3.E-02 | <i>St8sia4</i>       | NM_009183    |
| A_55_P2003746 | 2.8 | 2.0.E-02 | <i>Serpinb3a</i>     | NM_009126    |
| A_51_P239654  | 2.8 | 3.1.E-02 | <i>Nr4a1</i>         | NM_010444    |
| A_55_P2073432 | 2.8 | 8.9.E-03 | <i>Wnt8a</i>         | NM_009290    |
| A_51_P293938  | 2.8 | 5.5.E-03 | <i>Rasl11b</i>       | NM_026878    |
| A_51_P162955  | 2.8 | 2.0.E-02 | <i>Serpina7</i>      | NM_177920    |
| A_55_P2007447 | 2.8 | 5.5.E-03 | <i>Abhd3</i>         | NM_134130    |
| A_55_P2302848 | 2.8 | 1.2.E-02 | <i>9430065F17Rik</i> | AK021377     |
| A_55_P2048493 | 2.8 | 9.9.E-03 | <i>4931440P22Rik</i> | NR_027955    |
| A_55_P1983968 | 2.8 | 3.3.E-02 | <i>Slc24a6</i>       | NM_001177594 |
| A_51_P432520  | 2.8 | 5.2.E-03 | <i>Wrnip1</i>        | NM_030215    |
| A_55_P2043657 | 2.8 | 1.3.E-02 | <i>Zfp677</i>        | NM_172486    |
| A_51_P422124  | 2.8 | 5.5.E-03 | <i>Fam126a</i>       | NM_053090    |
| A_52_P332788  | 2.8 | 6.1.E-03 | <i>C130026I21Rik</i> | AK016231     |
| A_55_P2083919 | 2.8 | 1.4.E-02 | <i>Robo2</i>         | NM_175549    |
| A_55_P2175318 | 2.8 | 1.8.E-02 | <i>Dfna5</i>         | AK155135     |
| A_55_P2140002 | 2.8 | 9.5.E-03 | <i>Tnfaip8</i>       | NM_134131    |
| A_55_P2030186 | 2.8 | 6.5.E-03 | <i>Ifna7</i>         | NM_008334    |
| A_55_P2075200 | 2.8 | 7.3.E-03 | <i>Tor3a</i>         | NM_023141    |
| A_51_P381260  | 2.8 | 6.2.E-03 | <i>Fxyd5</i>         | NM_008761    |
| A_55_P2065074 | 2.8 | 9.1.E-03 | <i>N/A</i>           | XM_003084896 |
| A_52_P491244  | 2.8 | 4.3.E-03 | <i>Zfp287</i>        | NM_133208    |
| A_52_P308413  | 2.8 | 5.3.E-03 | <i>1810011H11Rik</i> | NM_001163616 |
| A_51_P326685  | 2.8 | 3.6.E-02 | <i>Lrtm1</i>         | NM_176920    |
| A_51_P138923  | 2.8 | 4.7.E-02 | <i>Peg12</i>         | NM_013788    |

|               |     |          |                      |              |
|---------------|-----|----------|----------------------|--------------|
| A_55_P2147315 | 2.8 | 9.1.E-03 | <i>Olf1441</i>       | NM_146683    |
| A_55_P1993955 | 2.8 | 1.3.E-02 | <i>Pltp</i>          | NM_011125    |
| A_55_P2048767 | 2.8 | 1.2.E-02 | <i>Efemp1</i>        | NM_146015    |
| A_51_P383032  | 2.8 | 1.9.E-02 | <i>Clec4d</i>        | NM_010819    |
| A_55_P1994289 | 2.7 | 9.1.E-03 | <i>Gm10791</i>       | XM_003085113 |
| A_55_P1974019 | 2.7 | 1.2.E-02 | <i>Dapk1</i>         | NM_029653    |
| A_55_P1995195 | 2.7 | 1.4.E-02 | <i>Fosl2</i>         | NM_008037    |
| A_55_P2039274 | 2.7 | 3.3.E-02 | <i>Hspb3</i>         | NM_019960    |
| A_55_P2111790 | 2.7 | 1.9.E-02 | <i>Gem</i>           | NM_010276    |
| A_55_P2072776 | 2.7 | 8.0.E-03 | <i>Fpgs</i>          | NM_010236    |
| A_51_P505823  | 2.7 | 1.0.E-02 | <i>Endod1</i>        | NM_028013    |
| A_55_P2024046 | 2.7 | 1.9.E-02 | <i>Slc16a5</i>       | NM_001080934 |
| A_55_P2031068 | 2.7 | 1.4.E-02 | N/A                  | N/A          |
| A_52_P650028  | 2.7 | 2.4.E-02 | <i>Dock10</i>        | NM_175291    |
| A_52_P497021  | 2.7 | 1.0.E-02 | <i>Spred3</i>        | NM_182927    |
| A_55_P1962771 | 2.7 | 1.0.E-02 | <i>Cyfip2</i>        | NM_133769    |
| A_55_P2032659 | 2.7 | 9.9.E-03 | <i>Tox</i>           | NM_145711    |
| A_55_P2106106 | 2.7 | 8.7.E-03 | <i>Gpr77</i>         | NM_176912    |
| A_51_P295315  | 2.7 | 1.1.E-02 | <i>Ankrd2</i>        | NM_020033    |
| A_55_P2105858 | 2.7 | 9.1.E-03 | <i>Atf5</i>          | NM_030693    |
| A_52_P322141  | 2.7 | 1.7.E-02 | <i>Ccdc88b</i>       | NM_001081291 |
| A_55_P1955637 | 2.7 | 2.2.E-02 | <i>Trp53i11</i>      | NM_001025246 |
| A_55_P2114133 | 2.7 | 1.8.E-02 | <i>Garnl3</i>        | NM_178888    |
| A_51_P375987  | 2.7 | 2.6.E-02 | <i>Fign</i>          | NM_021716    |
| A_55_P2178423 | 2.7 | 4.1.E-02 | N/A                  | N/A          |
| A_51_P142989  | 2.7 | 9.2.E-03 | <i>Zfp429</i>        | NM_001080941 |
| A_52_P450934  | 2.7 | 1.0.E-02 | <i>Paqr9</i>         | NM_198414    |
| A_55_P2103026 | 2.7 | 7.9.E-03 | <i>Sema3d</i>        | NM_028882    |
| A_55_P2098697 | 2.7 | 1.6.E-02 | <i>Tnfaip2</i>       | NM_009396    |
| A_51_P513311  | 2.7 | 8.6.E-03 | <i>Rxrg</i>          | NM_009107    |
| A_52_P131353  | 2.7 | 2.3.E-02 | <i>Camk1d</i>        | NM_177343    |
| A_55_P2292046 | 2.7 | 1.1.E-02 | <i>D230018H15Ri</i>  | AK084291     |
| A_55_P2028568 | 2.7 | 1.1.E-02 | <i>Gm6993</i>        | XM_894578    |
| A_52_P456750  | 2.7 | 1.2.E-02 | <i>Aph1b</i>         | NM_177583    |
| A_52_P246698  | 2.7 | 1.9.E-02 | <i>Fam126a</i>       | NM_053090    |
| A_51_P341130  | 2.7 | 6.5.E-03 | <i>Iqgap1</i>        | NM_016721    |
| A_51_P143468  | 2.7 | 6.5.E-03 | <i>Klhl26</i>        | NM_178771    |
| A_55_P2109857 | 2.7 | 1.1.E-02 | <i>Rgs2</i>          | NM_009061    |
| A_55_P2106763 | 2.7 | 7.3.E-03 | <i>1300014I06Rik</i> | NM_025831    |
| A_55_P2293007 | 2.7 | 1.2.E-02 | <i>AI662175</i>      | AK139019     |
| A_55_P2060592 | 2.7 | 1.1.E-02 | <i>Hoxa1</i>         | NM_010449    |

|               |     |          |                 |              |
|---------------|-----|----------|-----------------|--------------|
| A_51_P230624  | 2.7 | 1.3.E-02 | 2010109K11Ri/   | NM_001162903 |
| A_51_P342652  | 2.6 | 1.5.E-02 | <i>Cd79b</i>    | NM_008339    |
| A_55_P2143251 | 2.6 | 8.9.E-03 | <i>Rims3</i>    | AK163492     |
| A_51_P377452  | 2.6 | 7.4.E-03 | <i>Ncf4</i>     | NM_008677    |
| A_51_P483324  | 2.6 | 2.7.E-02 | <i>Ptpn22</i>   | NM_008979    |
| A_52_P13815   | 2.6 | 3.7.E-02 | <i>Laptm5</i>   | NM_010686    |
| A_52_P596008  | 2.6 | 9.1.E-03 | <i>Zeb2</i>     | NM_015753    |
| A_66_P124659  | 2.6 | 8.3.E-03 | <i>Mark1</i>    | NM_145515    |
| A_51_P244303  | 2.6 | 7.9.E-03 | <i>Smc1b</i>    | NM_080470    |
| A_66_P140699  | 2.6 | 1.8.E-02 | <i>Gm6403</i>   | AK032775     |
| A_55_P2024366 | 2.6 | 2.2.E-02 | <i>Raver2</i>   | NM_183024    |
| A_55_P1969058 | 2.6 | 2.0.E-02 | <i>Epha7</i>    | NM_001122889 |
| A_55_P1960053 | 2.6 | 5.0.E-03 | <i>Hvcn1</i>    | NM_001042489 |
| A_55_P2137121 | 2.6 | 8.2.E-03 | <i>Sp140</i>    | NM_001013817 |
| A_55_P1982499 | 2.6 | 1.5.E-02 | <i>Gldn</i>     | NM_177350    |
| A_55_P2001218 | 2.6 | 3.3.E-02 | <i>Cd80</i>     | NM_009855    |
| A_55_P2023314 | 2.6 | 6.5.E-03 | <i>Casz1</i>    | NM_001159344 |
| A_55_P2057283 | 2.6 | 1.2.E-02 | N/A             | AY170502     |
| A_55_P2113210 | 2.6 | 1.0.E-02 | <i>Cyth4</i>    | NM_028195    |
| A_55_P2315012 | 2.6 | 1.5.E-02 | 4930458D05Ri/   | XR_106287    |
| A_55_P1984243 | 2.6 | 7.0.E-03 | <i>Naip2</i>    | NM_010872    |
| A_52_P421897  | 2.6 | 2.9.E-02 | <i>Morc4</i>    | AK164017     |
| A_52_P199614  | 2.6 | 1.7.E-02 | <i>Wdfy4</i>    | NM_001146022 |
| A_51_P295816  | 2.6 | 9.0.E-03 | <i>Cep192</i>   | NM_027556    |
| A_55_P1983588 | 2.6 | 1.1.E-02 | <i>Pmepa1</i>   | NM_022995    |
| A_55_P2166501 | 2.6 | 6.9.E-03 | <i>Cd44</i>     | NM_009851    |
| A_55_P2121456 | 2.6 | 1.9.E-02 | <i>Fam43a</i>   | NM_177632    |
| A_52_P304128  | 2.6 | 1.1.E-02 | <i>Mmp14</i>    | NM_008608    |
| A_52_P428745  | 2.6 | 5.1.E-03 | <i>Camk2d</i>   | NM_001025439 |
| A_55_P1998421 | 2.6 | 1.6.E-02 | N/A             | N/A          |
| A_55_P2093143 | 2.6 | 2.7.E-02 | <i>Casd1</i>    | NM_145398    |
| A_52_P65077   | 2.6 | 3.5.E-02 | <i>Zfp820</i>   | NM_029281    |
| A_52_P99848   | 2.6 | 1.7.E-02 | <i>Pik3cd</i>   | NM_008840    |
| A_55_P2214348 | 2.6 | 1.7.E-02 | 4930469K13Ri/   | AK037310     |
| A_51_P228295  | 2.6 | 5.5.E-03 | <i>Mpzl1</i>    | NM_001001880 |
| A_55_P2171116 | 2.6 | 9.5.E-03 | <i>Lgals3</i>   | NM_001145953 |
| A_51_P382152  | 2.6 | 1.5.E-02 | <i>Procr</i>    | NM_011171    |
| A_51_P235123  | 2.6 | 9.4.E-03 | <i>Nfkbie</i>   | NM_008690    |
| A_55_P2030752 | 2.6 | 8.7.E-03 | <i>Nedd4l</i>   | NM_031881    |
| A_51_P450278  | 2.6 | 1.3.E-02 | 2010003K11Ri/   | NM_027237    |
| A_55_P2085779 | 2.6 | 6.8.E-03 | <i>Ifi2712b</i> | NM_145449    |

|               |     |          |                     |              |
|---------------|-----|----------|---------------------|--------------|
| A_55_P1955308 | 2.6 | 7.7.E-03 | <i>Sirpb1a</i>      | NM_001002898 |
| A_51_P435968  | 2.6 | 9.9.E-03 | <i>Tnfaip8</i>      | NM_134131    |
| A_55_P2036813 | 2.6 | 1.2.E-02 | <i>Hist3h2ba</i>    | NM_030082    |
| A_55_P2130388 | 2.6 | 7.5.E-03 | <i>Mical1</i>       | NM_138315    |
| A_55_P1994112 | 2.6 | 1.0.E-02 | <i>Sema5b</i>       | NM_013661    |
| A_55_P2007601 | 2.5 | 2.1.E-02 | <i>Sftpd</i>        | NM_009160    |
| A_51_P331288  | 2.5 | 2.6.E-02 | <i>Akr1b7</i>       | NM_009731    |
| A_55_P1962937 | 2.5 | 1.5.E-02 | <i>Trem2</i>        | NM_031254    |
| A_51_P117581  | 2.5 | 1.7.E-02 | <i>Cables1</i>      | NM_022021    |
| A_55_P1999648 | 2.5 | 1.4.E-02 | <i>Plin2</i>        | NM_007408    |
| A_52_P186937  | 2.5 | 6.5.E-03 | <i>Cmpk2</i>        | NM_020557    |
| A_55_P1970788 | 2.5 | 7.5.E-03 | <i>Gpr77</i>        | NM_176912    |
| A_52_P489295  | 2.5 | 5.3.E-03 | <i>Adamts1</i>      | NM_009621    |
| A_51_P511482  | 2.5 | 1.4.E-02 | <i>Ift57</i>        | NM_028680    |
| A_55_P2146177 | 2.5 | 8.0.E-03 | <i>Cerk</i>         | NM_145475    |
| A_55_P2337074 | 2.5 | 2.2.E-02 | <i>Mid1</i>         | NM_183151    |
| A_55_P2023637 | 2.5 | 8.1.E-03 | <i>Prg4</i>         | NM_021400    |
| A_52_P299771  | 2.5 | 4.3.E-02 | <i>Bcl2a1c</i>      | NM_007535    |
| A_55_P2065601 | 2.5 | 2.6.E-02 | <i>Syt15</i>        | NM_177704    |
| A_52_P451073  | 2.5 | 1.4.E-02 | <i>Tnfrsf21</i>     | NM_178589    |
| A_55_P2140271 | 2.5 | 4.5.E-02 | <i>Gm6083</i>       | BG071895     |
| A_51_P383340  | 2.5 | 2.2.E-02 | <i>4930513O06Ri</i> | XM_136059    |
| A_55_P2019098 | 2.5 | 1.7.E-02 | N/A                 | N/A          |
| A_51_P399071  | 2.5 | 4.2.E-02 | <i>Anp32a</i>       | NM_009672    |
| A_52_P24690   | 2.5 | 3.3.E-02 | N/A                 | AK038006     |
| A_51_P163173  | 2.5 | 2.0.E-02 | <i>Rbm12b</i>       | NM_028226    |
| A_55_P2074796 | 2.5 | 1.6.E-02 | <i>Cdkn2c</i>       | NM_007671    |
| A_55_P2425437 | 2.5 | 2.5.E-02 | <i>D030036P13Ri</i> | AK083507     |
| A_52_P408736  | 2.5 | 2.0.E-02 | <i>Slc16a7</i>      | AK085398     |
| A_55_P1960291 | 2.5 | 2.0.E-02 | <i>Tjp3</i>         | NM_013769    |
| A_55_P2184189 | 2.5 | 1.3.E-02 | <i>Ncf2</i>         | BC003730     |
| A_55_P2118037 | 2.5 | 7.1.E-03 | <i>Sirpa</i>        | NM_007547    |
| A_52_P585124  | 2.5 | 4.9.E-02 | <i>Cxcr4</i>        | NM_009911    |
| A_52_P557293  | 2.5 | 1.4.E-02 | <i>Tmprss2</i>      | NM_015775    |
| A_55_P1994927 | 2.5 | 9.9.E-03 | <i>Rab3il1</i>      | NM_144538    |
| A_55_P2028259 | 2.5 | 9.2.E-03 | <i>Rhbdf2</i>       | NM_172572    |
| A_52_P584188  | 2.5 | 2.5.E-02 | <i>Frat1</i>        | NM_008043    |
| A_52_P188261  | 2.5 | 1.9.E-02 | <i>Camk2d</i>       | NM_001025439 |
| A_51_P301636  | 2.5 | 2.1.E-02 | <i>9030409G11Ri</i> | NM_001109685 |
| A_55_P2181738 | 2.5 | 1.5.E-02 | <i>Lyz1</i>         | NM_013590    |
| A_55_P2051656 | 2.5 | 7.2.E-03 | <i>Shank2</i>       | NM_001113373 |

|               |     |          |                     |              |
|---------------|-----|----------|---------------------|--------------|
| A_52_P467449  | 2.5 | 1.2.E-02 | <i>Alox12</i>       | NM_007440    |
| A_55_P2068501 | 2.5 | 1.2.E-02 | <i>4921508M14Ri</i> | XM_001480797 |
| A_52_P11618   | 2.5 | 2.5.E-02 | <i>Dusp19</i>       | NM_024438    |
| A_55_P1967500 | 2.5 | 2.0.E-02 | <i>Nell1</i>        | NM_001037906 |
| A_51_P520966  | 2.5 | 2.5.E-02 | <i>Icosl</i>        | NM_015790    |
| A_51_P511315  | 2.5 | 1.7.E-02 | <i>Pstpip1</i>      | NM_011193    |
| A_55_P2055607 | 2.4 | 9.7.E-03 | <i>Enpp1</i>        | NM_008813    |
| A_51_P464918  | 2.4 | 2.1.E-02 | <i>Mefv</i>         | NM_019453    |
| A_51_P361492  | 2.4 | 1.5.E-02 | <i>Pou2f1</i>       | NM_198934    |
| A_55_P1992099 | 2.4 | 1.7.E-02 | <i>Ptprj</i>        | NM_008982    |
| A_51_P405167  | 2.4 | 6.3.E-03 | <i>Maf</i>          | NM_001025577 |
| A_51_P275591  | 2.4 | 9.5.E-03 | <i>Zfp292</i>       | NM_013889    |
| A_51_P183630  | 2.4 | 2.1.E-02 | <i>Bcor</i>         | NM_029510    |
| A_52_P607128  | 2.4 | 2.0.E-02 | <i>Msr1</i>         | NM_031195    |
| A_51_P111488  | 2.4 | 1.8.E-02 | <i>Gfod2</i>        | NM_027469    |
| A_55_P2076085 | 2.4 | 1.7.E-02 | N/A                 | XM_001480985 |
| A_66_P113268  | 2.4 | 9.9.E-03 | <i>Mme</i>          | NM_008604    |
| A_52_P274496  | 2.4 | 3.9.E-02 | <i>Tspan18</i>      | NM_183180    |
| A_66_P123167  | 2.4 | 3.6.E-02 | <i>Thsd7b</i>       | AK051714     |
| A_55_P2087840 | 2.4 | 2.5.E-02 | <i>Gpr50</i>        | NM_010340    |
| A_51_P234956  | 2.4 | 1.6.E-02 | <i>Xcl1</i>         | NM_008510    |
| A_55_P2027102 | 2.4 | 1.8.E-02 | <i>Rgs3</i>         | NM_134257    |
| A_51_P161830  | 2.4 | 8.9.E-03 | <i>Enpep</i>        | NM_007934    |
| A_55_P2021167 | 2.4 | 1.5.E-02 | <i>Srpk1</i>        | N/A          |
| A_55_P1997604 | 2.4 | 2.9.E-02 | <i>Pla2g4a</i>      | NM_008869    |
| A_55_P2097508 | 2.4 | 2.0.E-02 | <i>Mcc</i>          | NM_001085373 |
| A_52_P139788  | 2.4 | 8.6.E-03 | <i>Adamts11</i>     | AK020115     |
| A_52_P156190  | 2.4 | 1.1.E-02 | <i>Ednra</i>        | NM_010332    |
| A_51_P281593  | 2.4 | 8.0.E-03 | <i>Ppapdc1b</i>     | NM_028000    |
| A_55_P2146495 | 2.4 | 2.5.E-02 | <i>Gm10554</i>      | XM_003085214 |
| A_55_P2071132 | 2.4 | 2.8.E-02 | <i>Tnfrsf23</i>     | NM_024290    |
| A_55_P2072373 | 2.4 | 8.9.E-03 | <i>Msn</i>          | NM_010833    |
| A_52_P488437  | 2.4 | 1.4.E-02 | <i>Plek2</i>        | NM_013738    |
| A_66_P105736  | 2.4 | 1.1.E-02 | <i>Net1</i>         | NM_019671    |
| A_55_P2026268 | 2.4 | 1.5.E-02 | N/A                 | M34528       |
| A_55_P2114994 | 2.4 | 2.5.E-02 | N/A                 | N/A          |
| A_51_P401668  | 2.4 | 2.7.E-02 | <i>Laptm5</i>       | NM_010686    |
| A_55_P2401403 | 2.4 | 3.5.E-02 | <i>C030046G05</i>   | AK081287     |
| A_55_P2032818 | 2.4 | 2.2.E-02 | <i>Trim2</i>        | NM_030706    |
| A_52_P180373  | 2.4 | 8.3.E-03 | <i>Mpeg1</i>        | NM_010821    |
| A_55_P2021565 | 2.4 | 1.7.E-02 | <i>Ntf3</i>         | NM_001164034 |

|               |     |          |                      |              |
|---------------|-----|----------|----------------------|--------------|
| A_52_P435118  | 2.4 | 3.8.E-02 | <i>Stard13</i>       | NM_146258    |
| A_52_P577748  | 2.4 | 7.4.E-03 | <i>Lpxn</i>          | NM_134152    |
| A_51_P451588  | 2.4 | 3.0.E-02 | <i>Plekhb1</i>       | NM_013746    |
| A_55_P1999102 | 2.4 | 7.4.E-03 | <i>Pi16</i>          | NM_023734    |
| A_55_P1972490 | 2.4 | 3.6.E-02 | <i>Gm4055</i>        | BC058988     |
| A_55_P1987620 | 2.4 | 9.1.E-03 | <i>Cyp4a32</i>       | NM_001100181 |
| A_52_P134639  | 2.4 | 1.4.E-02 | <i>Tgoln2</i>        | NM_009444    |
| A_55_P2005552 | 2.4 | 1.2.E-02 | <i>Arhgef10l</i>     | NM_172415    |
| A_55_P2129348 | 2.4 | 1.2.E-02 | <i>Pilra</i>         | NM_153510    |
| A_51_P515120  | 2.4 | 2.0.E-02 | <i>Hs3st3a1</i>      | NM_178870    |
| A_52_P528600  | 2.4 | 1.2.E-02 | <i>Hhex</i>          | NM_008245    |
| A_55_P2174661 | 2.4 | 1.6.E-02 | <i>Tmsb15l</i>       | NM_207267    |
| A_55_P1972719 | 2.4 | 1.7.E-02 | <i>Pmm1</i>          | NM_013872    |
| A_55_P2035843 | 2.4 | 1.1.E-02 | N/A                  | N/A          |
| A_55_P2091551 | 2.4 | 1.5.E-02 | <i>Arhgap9</i>       | NM_146011    |
| A_55_P1959174 | 2.4 | 3.0.E-02 | <i>Pmepa1</i>        | NM_022995    |
| A_55_P2051308 | 2.4 | 1.7.E-02 | <i>Olfir1357</i>     | NM_001011737 |
| A_55_P1955015 | 2.4 | 1.4.E-02 | <i>Myo1g</i>         | NM_178440    |
| A_55_P1963463 | 2.4 | 1.7.E-02 | <i>Gabra3</i>        | NM_008067    |
| A_52_P78257   | 2.4 | 2.8.E-02 | <i>Plekha2</i>       | NM_031257    |
| A_66_P124755  | 2.3 | 1.1.E-02 | <i>Fut8</i>          | NM_016893    |
| A_55_P2056342 | 2.3 | 9.1.E-03 | <i>Mgst3</i>         | NM_025569    |
| A_51_P335569  | 2.3 | 2.1.E-02 | <i>Slco1a4</i>       | NM_030687    |
| A_55_P2040170 | 2.3 | 8.8.E-03 | <i>Pmp22</i>         | NM_008885    |
| A_52_P175242  | 2.3 | 3.5.E-02 | <i>Irs1</i>          | NM_010570    |
| A_66_P120612  | 2.3 | 2.0.E-02 | <i>Vax2os1</i>       | NR_002873    |
| A_51_P391727  | 2.3 | 8.8.E-03 | <i>Slc3a1</i>        | NM_009205    |
| A_55_P2090557 | 2.3 | 2.6.E-02 | <i>BC046404</i>      | NM_198861    |
| A_55_P2066230 | 2.3 | 2.0.E-02 | <i>Hck</i>           | NM_001172117 |
| A_55_P2146254 | 2.3 | 1.2.E-02 | <i>Ifitm1</i>        | NM_001112715 |
| A_55_P2028986 | 2.3 | 3.6.E-02 | <i>Lbp</i>           | N/A          |
| A_51_P348456  | 2.3 | 1.1.E-02 | <i>Rest</i>          | NM_011263    |
| A_52_P595824  | 2.3 | 8.9.E-03 | <i>Cpeb4</i>         | NM_026252    |
| A_55_P2063283 | 2.3 | 2.5.E-02 | N/A                  | GQ984290     |
| A_55_P2083014 | 2.3 | 1.2.E-02 | N/A                  | FM179715     |
| A_52_P534810  | 2.3 | 4.4.E-02 | <i>Gm597</i>         | NM_001013750 |
| A_66_P101519  | 2.3 | 7.7.E-03 | <i>Abcc9</i>         | NM_021041    |
| A_52_P248604  | 2.3 | 8.0.E-03 | <i>Cdh5</i>          | NM_009868    |
| A_55_P2082733 | 2.3 | 2.1.E-02 | <i>Cybb</i>          | NM_007807    |
| A_52_P185162  | 2.3 | 1.2.E-02 | <i>Slc26a3</i>       | BC037066     |
| A_51_P262925  | 2.3 | 1.1.E-02 | <i>1700018F24Rik</i> | NM_027069    |

|               |     |          |                      |              |
|---------------|-----|----------|----------------------|--------------|
| A_55_P1981167 | 2.3 | 8.9.E-03 | <i>C130026I21Rik</i> | NM_175219    |
| A_55_P1971938 | 2.3 | 1.9.E-02 | <i>Atp2b2</i>        | NM_009723    |
| A_52_P821     | 2.3 | 9.1.E-03 | <i>Fli1</i>          | NM_008026    |
| A_51_P479321  | 2.3 | 1.1.E-02 | <i>Acss1</i>         | NM_080575    |
| A_55_P1986630 | 2.3 | 1.3.E-02 | N/A                  | N/A          |
| A_52_P645862  | 2.3 | 8.6.E-03 | <i>Agtr1a</i>        | NM_177322    |
| A_51_P469285  | 2.3 | 1.9.E-02 | <i>Nrp1</i>          | NM_008737    |
| A_55_P2102065 | 2.3 | 2.5.E-02 | <i>Gm10639</i>       | NM_001122660 |
| A_55_P2011111 | 2.3 | 1.6.E-02 | <i>Cyp4a10</i>       | NM_010011    |
| A_55_P2016888 | 2.3 | 1.1.E-02 | <i>LOC100503876</i>  | N/A          |
| A_55_P2064043 | 2.3 | 7.4.E-03 | <i>Cd44</i>          | NM_009851    |
| A_55_P2259456 | 2.3 | 2.8.E-02 | <i>4933425B07Rik</i> | AK016907     |
| A_52_P469502  | 2.3 | 2.4.E-02 | <i>Cda</i>           | NM_028176    |
| A_55_P2135031 | 2.3 | 3.1.E-02 | N/A                  | N/A          |
| A_55_P1999715 | 2.3 | 1.6.E-02 | N/A                  | M97158       |
| A_51_P265495  | 2.3 | 3.7.E-02 | <i>Ly6a</i>          | NM_010738    |
| A_55_P2077558 | 2.3 | 1.6.E-02 | <i>Sod3</i>          | NM_011435    |
| A_55_P1987914 | 2.3 | 2.1.E-02 | <i>Map4k4</i>        | NM_008696    |
| A_51_P513568  | 2.3 | 2.0.E-02 | <i>Stx11</i>         | NM_029075    |
| A_55_P2250246 | 2.3 | 1.6.E-02 | <i>Taok3</i>         | NM_001199685 |
| A_55_P1984406 | 2.3 | 2.5.E-02 | <i>Lrrk2</i>         | NM_025730    |
| A_55_P2123706 | 2.3 | 3.3.E-02 | <i>Plekhb1</i>       | NM_013746    |
| A_55_P2012201 | 2.3 | 1.0.E-02 | <i>App</i>           | NM_001198823 |
| A_55_P1973254 | 2.3 | 9.5.E-03 | <i>Cmtm7</i>         | NM_133978    |
| A_55_P1958165 | 2.3 | 2.2.E-02 | <i>Ms4a7</i>         | NM_001025610 |
| A_55_P2076631 | 2.3 | 9.6.E-03 | <i>Gypc</i>          | NM_001048207 |
| A_55_P2057070 | 2.3 | 1.4.E-02 | <i>Magix</i>         | NM_018832    |
| A_55_P2029581 | 2.3 | 2.5.E-02 | N/A                  | N/A          |
| A_66_P128997  | 2.3 | 1.5.E-02 | <i>Pml</i>           | NM_178087    |
| A_52_P244702  | 2.3 | 4.1.E-02 | <i>Tcf7</i>          | NM_009331    |
| A_55_P2099760 | 2.3 | 1.4.E-02 | N/A                  | N/A          |
| A_51_P408584  | 2.3 | 3.5.E-02 | <i>Enpp1</i>         | AK014707     |
| A_55_P2135331 | 2.3 | 1.6.E-02 | <i>Evl</i>           | NM_001163394 |
| A_55_P2044582 | 2.3 | 1.6.E-02 | <i>Iglon5</i>        | NM_001164518 |
| A_51_P257419  | 2.3 | 8.9.E-03 | <i>Lhx2</i>          | NM_010710    |
| A_52_P633883  | 2.3 | 2.5.E-02 | <i>Zbtb6</i>         | NM_146253    |
| A_55_P2074381 | 2.3 | 8.6.E-03 | N/A                  | N/A          |
| A_51_P321341  | 2.3 | 1.8.E-02 | <i>Sult1a1</i>       | NM_133670    |
| A_52_P471282  | 2.3 | 1.6.E-02 | <i>Fmo4</i>          | NM_144878    |
| A_55_P1971951 | 2.3 | 2.1.E-02 | <i>Cd86</i>          | NM_019388    |
| A_51_P223929  | 2.3 | 1.4.E-02 | <i>Ash1l</i>         | NM_138679    |

|               |     |          |                     |              |
|---------------|-----|----------|---------------------|--------------|
| A_52_P52128   | 2.3 | 2.6.E-02 | <i>Leo1</i>         | NM_001039522 |
| A_51_P491987  | 2.3 | 3.5.E-02 | <i>Ripk3</i>        | NM_019955    |
| A_51_P352968  | 2.3 | 1.5.E-02 | <i>Marcks</i>       | NM_008538    |
| A_55_P1963533 | 2.3 | 1.5.E-02 | <i>Pcdhac2</i>      | NM_001003672 |
| A_55_P2110758 | 2.3 | 1.7.E-02 | <i>B430306N03Ri</i> | NM_177083    |
| A_55_P1968738 | 2.3 | 4.7.E-02 | <i>Nfkb1</i>        | NM_008689    |
| A_52_P235861  | 2.3 | 3.5.E-02 | <i>Peg3</i>         | NM_008817    |
| A_51_P333274  | 2.3 | 1.6.E-02 | <i>Gzmb</i>         | NM_013542    |
| A_55_P2124976 | 2.3 | 4.0.E-02 | <i>Grhl1</i>        | NM_145890    |
| A_55_P2038757 | 2.3 | 1.7.E-02 | <i>Fblim1</i>       | NM_133754    |
| A_55_P1994832 | 2.3 | 2.1.E-02 | <i>Zbtb42</i>       | NM_001100460 |
| A_55_P2181538 | 2.3 | 1.7.E-02 | <i>Sult1d1</i>      | NM_016771    |
| A_55_P2022369 | 2.3 | 1.2.E-02 | <i>Lbh</i>          | NM_029999    |
| A_52_P586141  | 2.3 | 3.3.E-02 | <i>Adcy7</i>        | NM_001037724 |
| A_51_P304109  | 2.3 | 1.6.E-02 | <i>Cyp2c39</i>      | NM_010003    |
| A_52_P547187  | 2.3 | 1.1.E-02 | <i>Tab2</i>         | NM_138667    |
| A_51_P336049  | 2.3 | 4.9.E-02 | <i>Krt33b</i>       | NM_013570    |
| A_66_P129236  | 2.3 | 1.5.E-02 | <i>Raver1</i>       | NM_027911    |
| A_52_P597634  | 2.3 | 8.8.E-03 | <i>Fzd1</i>         | NM_021457    |
| A_52_P662098  | 2.3 | 3.1.E-02 | <i>Net1</i>         | NM_019671    |
| A_52_P630867  | 2.3 | 1.8.E-02 | <i>Abcc4</i>        | NM_001033336 |
| A_66_P111224  | 2.3 | 2.7.E-02 | N/A                 | N/A          |
| A_55_P2077546 | 2.2 | 2.6.E-02 | N/A                 | N/A          |
| A_52_P93837   | 2.2 | 1.5.E-02 | <i>Mme</i>          | NM_008604    |
| A_51_P461319  | 2.2 | 1.9.E-02 | <i>Gatm</i>         | NM_025961    |
| A_55_P2158592 | 2.2 | 2.5.E-02 | <i>Sirpb1a</i>      | AK041165     |
| A_55_P2025490 | 2.2 | 2.8.E-02 | <i>Tnfrsf18</i>     | NM_009400    |
| A_51_P194658  | 2.2 | 4.0.E-02 | <i>Gk2</i>          | NM_010294    |
| A_55_P2036567 | 2.2 | 1.8.E-02 | <i>Vav1</i>         | NM_011691    |
| A_55_P2172396 | 2.2 | 3.5.E-02 | <i>A530064D06Ri</i> | NM_178796    |
| A_55_P2075070 | 2.2 | 1.3.E-02 | <i>S1pr5</i>        | NM_053190    |
| A_52_P679101  | 2.2 | 1.7.E-02 | <i>Tjp2</i>         | NM_011597    |
| A_55_P2128929 | 2.2 | 1.8.E-02 | <i>Cc2d2a</i>       | NM_172274    |
| A_55_P1954577 | 2.2 | 1.4.E-02 | <i>Sval2</i>        | NM_032542    |
| A_52_P648688  | 2.2 | 1.5.E-02 | <i>Zc3h12d</i>      | NM_172785    |
| A_52_P325116  | 2.2 | 1.5.E-02 | <i>Gramd1b</i>      | BC070451     |
| A_55_P2116054 | 2.2 | 3.1.E-02 | <i>Caprin1</i>      | NM_016739    |
| A_55_P1957353 | 2.2 | 1.5.E-02 | N/A                 | N/A          |
| A_51_P133562  | 2.2 | 2.4.E-02 | <i>Serpina6</i>     | NM_007618    |
| A_51_P374900  | 2.2 | 1.2.E-02 | <i>P2ry13</i>       | NM_028808    |
| A_55_P2260094 | 2.2 | 2.3.E-02 | <i>Tcf7l2</i>       | NM_001142918 |



|               |     |          |                |              |
|---------------|-----|----------|----------------|--------------|
| A_51_P392214  | 2.2 | 1.4.E-02 | 1810048J11Rik  | NM_026327    |
| A_52_P467389  | 2.2 | 3.6.E-02 | <i>Slc15a3</i> | NM_023044    |
| A_55_P2017759 | 2.2 | 1.9.E-02 | <i>Evi2a</i>   | NM_001033711 |
| A_55_P2061565 | 2.2 | 2.2.E-02 | <i>Zfp229</i>  | NM_001164676 |
| A_55_P2185826 | 2.2 | 2.2.E-02 | <i>Cyp3a13</i> | NM_007819    |
| A_51_P400543  | 2.2 | 7.8.E-03 | <i>Aif1</i>    | NM_019467    |
| A_55_P2031043 | 2.2 | 1.1.E-02 | <i>Stat5b</i>  | NM_011489    |
| A_55_P2033055 | 2.2 | 1.5.E-02 | <i>Pdp1</i>    | NM_001098230 |
| A_55_P2054628 | 2.2 | 9.9.E-03 | <i>Nrxn1</i>   | NM_020252    |
| A_55_P2053466 | 2.2 | 1.6.E-02 | N/A            | N/A          |
| A_52_P295067  | 2.2 | 3.2.E-02 | <i>Snn</i>     | NM_009223    |
| A_55_P2118268 | 2.2 | 2.7.E-02 | <i>Chpf</i>    | NM_001001565 |
| A_51_P462428  | 2.2 | 2.3.E-02 | <i>Galnt12</i> | AK019470     |
| A_51_P355753  | 2.2 | 2.6.E-02 | <i>Hic1</i>    | NM_010430    |
| A_55_P1983668 | 2.2 | 8.7.E-03 | <i>Gm6377</i>  | NM_001037917 |
| A_55_P2006869 | 2.2 | 1.5.E-02 | <i>Fyb</i>     | NM_011815    |
| A_52_P220879  | 2.2 | 1.3.E-02 | <i>Tgm2</i>    | NM_009373    |
| A_55_P2019699 | 2.2 | 4.1.E-02 | <i>Samhd1</i>  | NM_001139520 |
| A_55_P2019312 | 2.2 | 3.5.E-02 | <i>Car12</i>   | NM_178396    |
| A_55_P1954061 | 2.2 | 4.8.E-02 | <i>Nrxn2</i>   | NM_001205234 |
| A_55_P2128303 | 2.2 | 8.7.E-03 | <i>Ids</i>     | NM_010498    |
| A_55_P2024689 | 2.2 | 1.9.E-02 | <i>Rsbn1</i>   | NM_172684    |
| A_55_P2079560 | 2.2 | 2.4.E-02 | <i>Lilra6</i>  | NM_011090    |
| A_51_P196925  | 2.2 | 1.9.E-02 | <i>Cx3cl1</i>  | NM_009142    |
| A_55_P2050426 | 2.2 | 2.0.E-02 | <i>Ankrd50</i> | NM_001167883 |
| A_55_P2137309 | 2.2 | 2.5.E-02 | <i>Kctd11</i>  | NM_153143    |
| A_55_P2006158 | 2.2 | 1.2.E-02 | N/A            | N/A          |
| A_55_P2042988 | 2.2 | 1.5.E-02 | <i>Aoah</i>    | NM_012054    |
| A_55_P2066299 | 2.2 | 3.2.E-02 | <i>Gpr137b</i> | NM_031999    |
| A_51_P294555  | 2.2 | 9.4.E-03 | <i>Ifitm6</i>  | NM_001033632 |
| A_55_P2044257 | 2.2 | 4.8.E-02 | <i>Crem</i>    | NM_001110851 |
| A_55_P2071466 | 2.2 | 1.4.E-02 | <i>Ncf1</i>    | NM_010876    |
| A_55_P2118804 | 2.2 | 1.9.E-02 | 2310057N15Rik  | NM_027170    |
| A_55_P2080956 | 2.2 | 2.6.E-02 | <i>Chka</i>    | NM_013490    |
| A_55_P2027979 | 2.2 | 1.2.E-02 | <i>Impg2</i>   | NM_174876    |
| A_51_P309158  | 2.2 | 2.3.E-02 | <i>Snx20</i>   | NM_027840    |
| A_55_P2062936 | 2.2 | 2.5.E-02 | <i>Abca3</i>   | NM_013855    |
| A_52_P551856  | 2.2 | 2.5.E-02 | <i>Rnft1</i>   | NM_029788    |
| A_66_P108965  | 2.2 | 1.5.E-02 | <i>Smpd13b</i> | NM_133888    |
| A_55_P2273705 | 2.2 | 1.8.E-02 | A330044H09     | AK039451     |
| A_51_P203182  | 2.2 | 2.1.E-02 | <i>Apobr</i>   | NM_138310    |

|               |     |          |                     |              |
|---------------|-----|----------|---------------------|--------------|
| A_55_P2023542 | 2.2 | 1.4.E-02 | <i>Ccr7</i>         | NM_007719    |
| A_55_P2162910 | 2.2 | 1.1.E-02 | <i>Rtn1</i>         | NM_153457    |
| A_55_P2087265 | 2.2 | 1.6.E-02 | <i>Ifitm1</i>       | BC090258     |
| A_55_P2091928 | 2.2 | 2.2.E-02 | <i>Raet1b</i>       | NM_009017    |
| A_51_P462918  | 2.2 | 1.5.E-02 | <i>Ehhadh</i>       | NM_023737    |
| A_51_P490747  | 2.2 | 2.8.E-02 | <i>AI593442</i>     | NM_178906    |
| A_55_P1992959 | 2.2 | 1.4.E-02 | <i>Pfkfb4</i>       | NM_173019    |
| A_52_P379337  | 2.2 | 2.2.E-02 | <i>Rtn4</i>         | NM_194054    |
| A_55_P2141068 | 2.2 | 1.9.E-02 | <i>Ccdc109a</i>     | NM_001033259 |
| A_51_P448814  | 2.2 | 1.3.E-02 | <i>Zfp90</i>        | NM_011764    |
| A_55_P2033660 | 2.2 | 1.7.E-02 | <i>Crls1</i>        | NM_001024385 |
| A_55_P1996314 | 2.2 | 1.7.E-02 | <i>Amy2a5</i>       | NM_001042711 |
| A_55_P2113703 | 2.2 | 2.8.E-02 | <i>Spib</i>         | NM_019866    |
| A_55_P2087607 | 2.2 | 3.9.E-02 | <i>Cp</i>           | NM_001042611 |
| A_51_P254895  | 2.2 | 2.6.E-02 | <i>Cyp4a10</i>      | NM_010011    |
| A_55_P1968703 | 2.2 | 1.2.E-02 | <i>Gfra2</i>        | NM_008115    |
| A_55_P1952618 | 2.2 | 2.2.E-02 | <i>Ear2</i>         | NM_007895    |
| A_51_P513776  | 2.2 | 3.3.E-02 | N/A                 | AF296427     |
| A_51_P478172  | 2.2 | 2.8.E-02 | N/A                 | U07661       |
| A_55_P1966721 | 2.2 | 1.9.E-02 | <i>9930105H17Ri</i> | BC027236     |
| A_52_P377416  | 2.2 | 1.0.E-02 | <i>Disp1</i>        | NM_026866    |
| A_52_P354682  | 2.2 | 4.0.E-02 | <i>Elovl7</i>       | NM_029001    |
| A_52_P539632  | 2.2 | 2.3.E-02 | <i>Plxna3</i>       | NM_008883    |
| A_55_P2073705 | 2.2 | 3.3.E-02 | <i>Tfdp2</i>        | NM_178667    |
| A_66_P132446  | 2.2 | 4.9.E-02 | <i>Usp15</i>        | NM_027604    |
| A_55_P1958554 | 2.2 | 1.7.E-02 | <i>Ar</i>           | NM_013476    |
| A_55_P2074085 | 2.2 | 1.9.E-02 | <i>Gimap8</i>       | NM_001077410 |
| A_51_P389751  | 2.2 | 1.3.E-02 | <i>Relb</i>         | NM_009046    |
| A_55_P2021266 | 2.2 | 1.5.E-02 | <i>Hpse</i>         | NM_152803    |
| A_51_P285749  | 2.2 | 1.5.E-02 | <i>Olf1175-ps</i>   | XM_621555    |
| A_55_P2031045 | 2.2 | 1.2.E-02 | <i>Stat5b</i>       | NM_011489    |
| A_55_P2170737 | 2.1 | 2.7.E-02 | <i>Igf2bp2</i>      | NM_183029    |
| A_55_P2104487 | 2.1 | 1.8.E-02 | <i>Pld1</i>         | NM_001164056 |
| A_51_P167360  | 2.1 | 2.9.E-02 | <i>Ptpn7</i>        | NM_177081    |
| A_51_P201480  | 2.1 | 1.1.E-02 | <i>Stat3</i>        | NM_213659    |
| A_66_P129800  | 2.1 | 1.9.E-02 | <i>Rab8b</i>        | NM_173413    |
| A_55_P2056606 | 2.1 | 2.8.E-02 | N/A                 | N/A          |
| A_51_P408363  | 2.1 | 1.1.E-02 | <i>Cfp</i>          | NM_008823    |
| A_55_P1976869 | 2.1 | 1.5.E-02 | <i>Hsdl2</i>        | NM_024255    |
| A_55_P2129172 | 2.1 | 2.2.E-02 | <i>Rab40b</i>       | NM_139147    |
| A_52_P359621  | 2.1 | 4.2.E-02 | <i>Luzp1</i>        | NM_024452    |

|               |     |          |                      |              |
|---------------|-----|----------|----------------------|--------------|
| A_55_P2129000 | 2.1 | 1.5.E-02 | <i>Cyyr1</i>         | NM_144853    |
| A_55_P1952235 | 2.1 | 1.2.E-02 | <i>Spry1</i>         | NM_011896    |
| A_55_P2005475 | 2.1 | 2.3.E-02 | <i>Sult1a1</i>       | NM_133670    |
| A_55_P2105472 | 2.1 | 2.1.E-02 | <i>Omg</i>           | NM_019409    |
| A_51_P285206  | 2.1 | 4.4.E-02 | <i>Cd3d</i>          | NM_013487    |
| A_51_P167292  | 2.1 | 3.9.E-02 | <i>Chi3l3</i>        | NM_009892    |
| A_55_P2111770 | 2.1 | 1.0.E-02 | <i>Klhl13</i>        | NM_026167    |
| A_52_P299832  | 2.1 | 1.2.E-02 | <i>Plxnc1</i>        | NM_018797    |
| A_55_P2142430 | 2.1 | 2.1.E-02 | <i>Bank1</i>         | NM_001033350 |
| A_66_P120567  | 2.1 | 1.5.E-02 | <i>Anxa1</i>         | NM_010730    |
| A_55_P2004179 | 2.1 | 1.0.E-02 | <i>Col2a1</i>        | NM_001113515 |
| A_52_P282905  | 2.1 | 1.4.E-02 | <i>Ces1b</i>         | NM_001081372 |
| A_52_P487362  | 2.1 | 2.1.E-02 | <i>Ppp4r4</i>        | NM_028980    |
| A_55_P1976224 | 2.1 | 1.7.E-02 | <i>Ckb</i>           | NM_021273    |
| A_51_P270899  | 2.1 | 2.6.E-02 | <i>Zfp61</i>         | NM_009561    |
| A_55_P2059010 | 2.1 | 4.5.E-02 | <i>Rbp1</i>          | NM_011254    |
| A_55_P1981455 | 2.1 | 1.6.E-02 | N/A                  | N/A          |
| A_51_P176752  | 2.1 | 1.7.E-02 | <i>4930483J18Rik</i> | NR_015603    |
| A_51_P104418  | 2.1 | 4.1.E-02 | <i>Dusp10</i>        | NM_022019    |
| A_55_P1960197 | 2.1 | 2.1.E-02 | <i>P2ry14</i>        | NM_133200    |
| A_55_P2133266 | 2.1 | 1.2.E-02 | <i>Cxx1c</i>         | NM_028375    |
| A_51_P288138  | 2.1 | 2.5.E-02 | <i>Fpr2</i>          | NM_008039    |
| A_55_P2061737 | 2.1 | 1.6.E-02 | <i>Tmsb4x</i>        | NM_021278    |
| A_55_P1989698 | 2.1 | 2.6.E-02 | <i>Mmp11</i>         | NM_008606    |
| A_55_P2127884 | 2.1 | 2.1.E-02 | <i>Btbd1</i>         | NM_146193    |
| A_51_P161037  | 2.1 | 2.5.E-02 | <i>Cep170</i>        | NM_001099637 |
| A_51_P275496  | 2.1 | 1.7.E-02 | <i>BC026762</i>      | BC029971     |
| A_66_P106497  | 2.1 | 3.7.E-02 | N/A                  | U29575       |
| A_55_P2027999 | 2.1 | 1.7.E-02 | <i>Hk1</i>           | NM_001146100 |
| A_51_P389988  | 2.1 | 1.4.E-02 | <i>Slc40a1</i>       | NM_016917    |
| A_55_P2009001 | 2.1 | 1.8.E-02 | <i>Gprc5d</i>        | NM_001205396 |
| A_51_P297679  | 2.1 | 1.9.E-02 | <i>Hcls1</i>         | NM_008225    |
| A_55_P2081488 | 2.1 | 2.6.E-02 | <i>Pglyrp1</i>       | NM_009402    |
| A_51_P338878  | 2.1 | 1.3.E-02 | <i>P2ry12</i>        | NM_027571    |
| A_55_P2149896 | 2.1 | 4.7.E-02 | <i>BC046404</i>      | NM_198861    |
| A_55_P2051879 | 2.1 | 2.1.E-02 | <i>4930473A06Rik</i> | NM_001081012 |
| A_55_P1962305 | 2.1 | 1.7.E-02 | <i>Plac8</i>         | NM_139198    |
| A_51_P240269  | 2.1 | 3.9.E-02 | <i>Fam199x</i>       | NM_146261    |
| A_55_P1980421 | 2.1 | 1.1.E-02 | <i>Wdr81</i>         | NM_138950    |
| A_55_P2134022 | 2.1 | 4.4.E-02 | <i>Cftr</i>          | NM_021050    |
| A_52_P106766  | 2.1 | 4.7.E-02 | <i>Gk5</i>           | NM_177352    |

|               |     |          |                      |              |
|---------------|-----|----------|----------------------|--------------|
| A_55_P2140118 | 2.1 | 1.0.E-02 | <i>Qpct</i>          | NM_027455    |
| A_66_P101600  | 2.1 | 2.3.E-02 | <i>Lamb1</i>         | NM_008482    |
| A_55_P1993719 | 2.1 | 1.3.E-02 | <i>Tmem216</i>       | NM_026798    |
| A_51_P170911  | 2.1 | 1.7.E-02 | <i>Ptpn9</i>         | NM_019651    |
| A_51_P302566  | 2.1 | 1.1.E-02 | <i>Maob</i>          | NM_172778    |
| A_55_P2038747 | 2.1 | 1.6.E-02 | <i>Ano1</i>          | NM_178642    |
| A_55_P1994132 | 2.1 | 1.3.E-02 | <i>Tmem184a</i>      | AK148454     |
| A_55_P2050628 | 2.1 | 2.9.E-02 | <i>Cyp4a31</i>       | NM_201640    |
| A_52_P527800  | 2.1 | 3.6.E-02 | <i>Emilin2</i>       | NM_145158    |
| A_55_P2143446 | 2.1 | 2.1.E-02 | N/A                  | N/A          |
| A_55_P1971278 | 2.1 | 2.7.E-02 | <i>Kdm2a</i>         | NM_001001984 |
| A_55_P2031989 | 2.1 | 2.8.E-02 | <i>Rin2</i>          | NM_028724    |
| A_55_P2066827 | 2.1 | 4.5.E-02 | <i>Hexim2</i>        | NM_027658    |
| A_55_P2031167 | 2.1 | 2.5.E-02 | <i>Efna1</i>         | NM_010107    |
| A_55_P2030938 | 2.1 | 2.0.E-02 | <i>Trim59</i>        | NM_025863    |
| A_55_P2093889 | 2.1 | 1.5.E-02 | <i>Arhgef19</i>      | NM_172520    |
| A_66_P104422  | 2.1 | 2.9.E-02 | <i>Ckap4</i>         | NM_175451    |
| A_55_P1953938 | 2.1 | 1.9.E-02 | <i>1700057K13Ril</i> | NM_028540    |
| A_51_P505493  | 2.1 | 1.5.E-02 | <i>Elovl5</i>        | NM_134255    |
| A_52_P89477   | 2.1 | 3.8.E-02 | <i>Bcl9</i>          | AK147659     |
| A_51_P447866  | 2.1 | 3.0.E-02 | <i>Sash3</i>         | NM_028773    |
| A_52_P456640  | 2.1 | 1.2.E-02 | <i>Fgr</i>           | NM_010208    |
| A_52_P240796  | 2.1 | 1.6.E-02 | <i>Rdh16</i>         | NM_009040    |
| A_55_P1980262 | 2.1 | 1.0.E-02 | <i>Cxx1b</i>         | NM_001018063 |
| A_55_P2148828 | 2.1 | 2.1.E-02 | <i>Pfpl</i>          | NM_019540    |
| A_55_P2269894 | 2.1 | 3.9.E-02 | <i>4833417C18Ril</i> | AK133925     |
| A_55_P2134236 | 2.1 | 2.8.E-02 | <i>Foxa2</i>         | NM_010446    |
| A_55_P2167347 | 2.1 | 2.9.E-02 | N/A                  | X53355       |
| A_55_P2011385 | 2.1 | 2.5.E-02 | N/A                  | N/A          |
| A_55_P2034864 | 2.1 | 1.5.E-02 | <i>Tubb2b</i>        | NM_023716    |
| A_51_P319022  | 2.1 | 2.8.E-02 | <i>Cxcr3</i>         | NM_009910    |
| A_55_P2079579 | 2.1 | 2.1.E-02 | <i>Pira7</i>         | NM_011094    |
| A_52_P325443  | 2.0 | 1.5.E-02 | <i>Arhgap29</i>      | NM_172525    |
| A_55_P1964483 | 2.0 | 1.1.E-02 | <i>Cyp2c37</i>       | NM_010001    |
| A_52_P641758  | 2.0 | 1.9.E-02 | <i>Ggct</i>          | NM_026637    |
| A_52_P591166  | 2.0 | 1.5.E-02 | <i>Dpysl2</i>        | NM_009955    |
| A_55_P2073754 | 2.0 | 3.0.E-02 | <i>Adam23</i>        | NM_011780    |
| A_55_P2113165 | 2.0 | 1.7.E-02 | <i>Camkk1</i>        | NM_018883    |
| A_55_P2096314 | 2.0 | 2.0.E-02 | <i>Rnf130</i>        | N/A          |
| A_55_P2170454 | 2.0 | 1.8.E-02 | <i>Gsta2</i>         | NM_008182    |
| A_51_P442719  | 2.0 | 1.7.E-02 | <i>Usp6nl</i>        | NM_181399    |

|               |     |          |                      |              |
|---------------|-----|----------|----------------------|--------------|
| A_52_P496655  | 2.0 | 4.3.E-02 | <i>Leprotl1</i>      | NM_026609    |
| A_55_P2010152 | 2.0 | 1.9.E-02 | <i>Sell</i>          | NM_001164059 |
| A_55_P2055257 | 2.0 | 1.4.E-02 | <i>Maoa</i>          | NM_173740    |
| A_52_P441974  | 2.0 | 4.1.E-02 | <i>Evc2</i>          | NM_145920    |
| A_55_P1983523 | 2.0 | 3.8.E-02 | <i>Cd300ld</i>       | NM_145437    |
| A_55_P2185821 | 2.0 | 1.8.E-02 | <i>Cyp3a13</i>       | NM_007819    |
| A_52_P597461  | 2.0 | 1.1.E-02 | <i>Skil</i>          | NM_011386    |
| A_52_P62444   | 2.0 | 2.1.E-02 | <i>Syn2</i>          | NM_013681    |
| A_55_P2048348 | 2.0 | 1.3.E-02 | <i>Aig1</i>          | NM_025446    |
| A_51_P413916  | 2.0 | 1.8.E-02 | <i>Pgrmc2</i>        | NM_027558    |
| A_55_P2256646 | 2.0 | 1.6.E-02 | <i>C130078N14</i>    | AK081811     |
| A_52_P94521   | 2.0 | 1.4.E-02 | <i>2510009E07Rik</i> | NM_001001881 |
| A_55_P2038101 | 2.0 | 3.5.E-02 | <i>Dock11</i>        | NM_001009947 |
| A_52_P408025  | 2.0 | 3.1.E-02 | <i>Mpped2</i>        | NM_001143683 |
| A_55_P1961270 | 2.0 | 2.0.E-02 | <i>Cd72</i>          | NM_001110320 |
| A_55_P2038767 | 2.0 | 1.2.E-02 | <i>Fam49a</i>        | NM_029758    |
| A_55_P1999958 | 2.0 | 3.5.E-02 | N/A                  | XM_003086868 |
| A_51_P121891  | 2.0 | 1.7.E-02 | <i>Rac2</i>          | NM_009008    |
| A_66_P124677  | 2.0 | 4.3.E-02 | <i>Ipcef1</i>        | NM_001170801 |
| A_55_P1991773 | 2.0 | 2.7.E-02 | <i>Icos</i>          | NM_017480    |
| A_52_P527917  | 2.0 | 1.3.E-02 | <i>Slc16a10</i>      | NM_028247    |
| A_55_P2084308 | 2.0 | 1.9.E-02 | <i>Nid1</i>          | NM_010917    |
| A_55_P2398788 | 2.0 | 4.1.E-02 | <i>Rnf112</i>        | NM_009548    |
| A_55_P2082989 | 2.0 | 2.6.E-02 | <i>5430435G22Rik</i> | NM_145509    |
| A_55_P2061991 | 2.0 | 1.7.E-02 | <i>Pnlnc1</i>        | NM_001034866 |
| A_55_P1958246 | 2.0 | 2.5.E-02 | <i>Tcof1</i>         | NM_001198984 |
| A_55_P2027259 | 2.0 | 3.3.E-02 | <i>Zcchc2</i>        | NM_001122675 |
| A_51_P327796  | 2.0 | 2.2.E-02 | <i>Itgb5</i>         | NM_010580    |
| A_55_P2030383 | 2.0 | 4.7.E-02 | <i>Frmd4a</i>        | NM_001177843 |
| A_55_P1979341 | 2.0 | 1.2.E-02 | <i>Cyba</i>          | NM_007806    |
| A_52_P244496  | 2.0 | 2.9.E-02 | <i>2610101N10Rik</i> | NM_001114977 |
| A_55_P2067772 | 2.0 | 2.1.E-02 | <i>2410089E03Rik</i> | NM_001162906 |
| A_55_P2030899 | 2.0 | 4.6.E-02 | N/A                  | N/A          |
| A_66_P108709  | 2.0 | 1.4.E-02 | <i>Gm8439</i>        | NM_001101603 |
| A_51_P148037  | 2.0 | 2.6.E-02 | <i>Sh3pxd2b</i>      | NM_177364    |
| A_52_P326150  | 2.0 | 1.9.E-02 | <i>Samd15</i>        | XM_138106    |
| A_51_P490817  | 2.0 | 1.6.E-02 | <i>Me2</i>           | NM_145494    |
| A_51_P211131  | 2.0 | 2.7.E-02 | <i>Traf3ip2</i>      | NM_134000    |
| A_51_P282144  | 2.0 | 1.4.E-02 | <i>Adam23</i>        | NM_011780    |
| A_51_P316553  | 2.0 | 1.5.E-02 | <i>Kdr</i>           | NM_010612    |
| A_55_P2072493 | 2.0 | 4.0.E-02 | <i>F8</i>            | NM_001161374 |

|               |     |          |                     |              |
|---------------|-----|----------|---------------------|--------------|
| A_51_P498882  | 2.0 | 1.3.E-02 | <i>Cyp2c37</i>      | NM_010001    |
| A_66_P138137  | 2.0 | 2.6.E-02 | <i>Pnp</i>          | NM_013632    |
| A_55_P2245852 | 2.0 | 2.1.E-02 | <i>Tspan32</i>      | NM_001128080 |
| A_55_P2026753 | 2.0 | 1.8.E-02 | <i>Zmat1</i>        | NM_175446    |
| A_55_P1966608 | 2.0 | 2.5.E-02 | <i>LOC100505009</i> | XM_003086781 |
| A_55_P2020128 | 2.0 | 1.2.E-02 | <i>Dhrs3</i>        | NM_011303    |
| A_55_P2014690 | 2.0 | 3.1.E-02 | <i>Taok3</i>        | N/A          |
| A_55_P2070194 | 2.0 | 1.8.E-02 | <i>Caprin1</i>      | NM_016739    |
| A_55_P2088385 | 2.0 | 1.9.E-02 | <i>Tnnt1</i>        | NM_011618    |
| A_66_P118592  | 2.0 | 2.1.E-02 | <i>Atrx</i>         | NM_009530    |
| A_51_P334308  | 2.0 | 2.0.E-02 | <i>Tspan14</i>      | NM_145928    |
| A_55_P2158404 | 2.0 | 2.0.E-02 | <i>Cmpk2</i>        | NM_020557    |
| A_52_P209311  | 2.0 | 1.3.E-02 | <i>Snx12</i>        | NM_001110310 |
| A_55_P2184796 | 2.0 | 4.1.E-02 | <i>Pcdhb18</i>      | NM_053143    |
| A_55_P2047155 | 2.0 | 1.9.E-02 | <i>Meis2</i>        | NM_001159569 |
| A_55_P2078735 | 2.0 | 3.7.E-02 | <i>AI662270</i>     | NR_015519    |
| A_55_P1960416 | 2.0 | 2.6.E-02 | <i>Lrrc33</i>       | NM_146069    |
| A_55_P2177911 | 2.0 | 1.7.E-02 | <i>Lepr</i>         | NM_010704    |
| A_66_P102163  | 2.0 | 1.6.E-02 | N/A                 | N/A          |
| A_55_P2088425 | 2.0 | 1.2.E-02 | <i>Tcn2</i>         | NM_015749    |
| A_55_P1980180 | 2.0 | 2.9.E-02 | <i>Tardbp</i>       | NM_145556    |
| A_51_P293982  | 2.0 | 2.9.E-02 | <i>Plekho2</i>      | NM_153119    |
| A_66_P118600  | 2.0 | 1.5.E-02 | <i>Lama1</i>        | NM_008480    |
| A_55_P1977473 | 2.0 | 1.9.E-02 | <i>Dab2</i>         | NM_023118    |
| A_51_P196158  | 2.0 | 1.6.E-02 | <i>Btd</i>          | NM_025295    |
| A_52_P263095  | 2.0 | 3.5.E-02 | <i>Ahnak</i>        | NM_009643    |
| A_55_P2126805 | 2.0 | 1.5.E-02 | <i>Wdr81</i>        | NM_138950    |
| A_55_P2098911 | 2.0 | 3.9.E-02 | <i>Lrrcc1</i>       | NM_028915    |
| A_51_P119429  | 2.0 | 1.4.E-02 | <i>Nckap11</i>      | NM_153505    |
| A_52_P307961  | 2.0 | 1.8.E-02 | <i>Abca5</i>        | NM_147219    |
| A_52_P354823  | 2.0 | 2.5.E-02 | <i>Irf8</i>         | NM_008320    |
| A_55_P2046348 | 2.0 | 1.4.E-02 | <i>Itpril2</i>      | NM_001033380 |
| A_55_P1999269 | 2.0 | 2.8.E-02 | <i>Adrbk1</i>       | NM_130863    |
| A_55_P2129316 | 2.0 | 3.1.E-02 | N/A                 | N/A          |
| A_52_P515057  | 2.0 | 1.5.E-02 | <i>Slc25a24</i>     | NM_172685    |
| A_52_P563617  | 2.0 | 1.3.E-02 | <i>Ssbp4</i>        | NM_133772    |
| A_55_P1970474 | 2.0 | 2.4.E-02 | <i>Tmem67</i>       | NM_177861    |
| A_51_P288295  | 2.0 | 1.9.E-02 | N/A                 | FM179740     |
| A_55_P1981035 | 2.0 | 2.6.E-02 | N/A                 | N/A          |
| A_55_P2035509 | 2.0 | 1.9.E-02 | <i>Pyhin1</i>       | NM_175026    |
| A_55_P1970665 | 2.0 | 3.1.E-02 | <i>Kdm3b</i>        | NM_001081256 |

|               |     |          |                     |              |
|---------------|-----|----------|---------------------|--------------|
| A_55_P1993358 | 2.0 | 3.3.E-02 | <i>N/A</i>          | XR_030524    |
| A_51_P118763  | 2.0 | 1.9.E-02 | <i>Ahctf1</i>       | NM_026375    |
| A_51_P270558  | 2.0 | 4.1.E-02 | <i>2210409D07Ri</i> | AK008868     |
| A_52_P114282  | 2.0 | 2.4.E-02 | <i>Armcx5</i>       | NM_001009575 |
| A_66_P105801  | 2.0 | 2.0.E-02 | <i>Igf1r</i>        | NM_010513    |
| A_51_P487918  | 2.0 | 2.1.E-02 | <i>Rin1</i>         | NM_177158    |
| A_52_P552589  | 2.0 | 1.8.E-02 | <i>Map4k1</i>       | NM_008279    |
| A_51_P204740  | 2.0 | 2.9.E-02 | <i>Cd34</i>         | NM_133654    |
| A_51_P239737  | 2.0 | 1.3.E-02 | <i>Pigr</i>         | NM_011082    |
| A_66_P117251  | 2.0 | 3.8.E-02 | <i>Snx6</i>         | NM_026998    |
| A_51_P219505  | 2.0 | 2.0.E-02 | <i>Slc41a2</i>      | NM_177388    |
| A_55_P1995337 | 2.0 | 3.5.E-02 | <i>Btnl5</i>        | NR_004051    |
| A_51_P445473  | 2.0 | 2.3.E-02 | <i>Fut7</i>         | NM_013524    |
| A_52_P624107  | 2.0 | 2.8.E-02 | <i>Gm5039</i>       | NR_003647    |
| A_55_P2038362 | 2.0 | 2.6.E-02 | <i>Acot5</i>        | NM_145444    |
| A_55_P2364738 | 2.0 | 4.7.E-02 | <i>Plxdc1</i>       | NM_001163608 |
| A_51_P126437  | 2.0 | 3.4.E-02 | <i>Enc1</i>         | NM_007930    |
| A_52_P110070  | 2.0 | 1.5.E-02 | <i>5730416F02Ri</i> | NR_033596    |
| A_55_P2000833 | 2.0 | 3.3.E-02 | <i>E2f8</i>         | NM_001013368 |
| A_51_P406204  | 2.0 | 3.4.E-02 | <i>Olfir822</i>     | NM_146671    |
| A_51_P418420  | 2.0 | 2.3.E-02 | <i>Ddx3x</i>        | NM_010028    |
| A_65_P06572   | 2.0 | 2.9.E-02 | <i>Smad5</i>        | NM_001164041 |
| A_52_P17146   | 2.0 | 1.3.E-02 | <i>Bmpr1a</i>       | NM_009758    |
| A_51_P349888  | 2.0 | 2.9.E-02 | <i>Ang2</i>         | NM_007449    |
| A_55_P1956812 | 2.0 | 2.6.E-02 | <i>Fam83g</i>       | NM_178618    |
| A_52_P277104  | 2.0 | 1.5.E-02 | <i>Bank1</i>        | NM_001033350 |
| A_55_P2072980 | 2.0 | 2.1.E-02 | <i>Spna2</i>        | NM_001177668 |
| A_51_P418560  | 2.0 | 1.9.E-02 | <i>Lnx2</i>         | NM_080795    |
| A_55_P1992572 | 1.9 | 1.9.E-02 | <i>Celf4</i>        | NM_001146292 |
| A_51_P311785  | 1.9 | 2.3.E-02 | <i>Man2b2</i>       | NM_008550    |
| A_55_P1984886 | 1.9 | 1.3.E-02 | <i>Hcst</i>         | NM_011827    |
| A_51_P312437  | 1.9 | 2.6.E-02 | <i>Dhrs7</i>        | NM_025522    |
| A_66_P110914  | 1.9 | 2.8.E-02 | <i>9930032O22Ri</i> | NM_177162    |
| A_52_P305995  | 1.9 | 4.0.E-02 | <i>Ammecr1</i>      | NM_019496    |
| A_51_P390538  | 1.9 | 3.3.E-02 | <i>Mpeg1</i>        | NM_010821    |
| A_55_P2235911 | 1.9 | 3.5.E-02 | <i>0610009E02Ri</i> | AK075572     |
| A_52_P8922    | 1.9 | 2.8.E-02 | <i>Sntb2</i>        | NM_009229    |
| A_55_P2229098 | 1.9 | 2.1.E-02 | <i>LOC629206</i>    | AK090054     |
| A_51_P114616  | 1.9 | 1.4.E-02 | <i>Batf</i>         | NM_016767    |
| A_51_P143190  | 1.9 | 2.0.E-02 | <i>Ly11</i>         | NM_008535    |
| A_51_P225427  | 1.9 | 1.9.E-02 | <i>Pkp2</i>         | NM_026163    |

|               |     |          |                      |              |
|---------------|-----|----------|----------------------|--------------|
| A_55_P2106404 | 1.9 | 2.3.E-02 | <i>N/A</i>           | N/A          |
| A_52_P367520  | 1.9 | 1.3.E-02 | <i>Nexn</i>          | NM_199465    |
| A_55_P1984730 | 1.9 | 1.3.E-02 | <i>Sgpl1</i>         | NM_009163    |
| A_52_P1020860 | 1.9 | 2.0.E-02 | <i>AW112010</i>      | NM_001177351 |
| A_55_P2056926 | 1.9 | 2.5.E-02 | <i>Mtss1l</i>        | NM_198625    |
| A_66_P136801  | 1.9 | 2.9.E-02 | <i>Peg13</i>         | NR_002864    |
| A_55_P2132902 | 1.9 | 3.7.E-02 | <i>Gprasp1</i>       | NM_026081    |
| A_55_P2452259 | 1.9 | 2.1.E-02 | <i>Gls</i>           | NM_001113383 |
| A_55_P1976097 | 1.9 | 1.7.E-02 | <i>Fads3</i>         | AK162624     |
| A_51_P246066  | 1.9 | 1.7.E-02 | <i>Slamf9</i>        | NM_029612    |
| A_66_P105175  | 1.9 | 2.2.E-02 | <i>Bche</i>          | NM_009738    |
| A_55_P2042356 | 1.9 | 2.7.E-02 | <i>Rftn1</i>         | NM_181397    |
| A_51_P246653  | 1.9 | 2.3.E-02 | <i>Clec7a</i>        | NM_020008    |
| A_51_P256384  | 1.9 | 1.7.E-02 | <i>Atp2b2</i>        | NM_009723    |
| A_52_P51548   | 1.9 | 2.9.E-02 | <i>Pard3</i>         | NM_033620    |
| A_55_P2064955 | 1.9 | 2.7.E-02 | <i>Gm3728</i>        | AK053416     |
| A_55_P1954258 | 1.9 | 4.7.E-02 | <i>Zfp652</i>        | NM_201609    |
| A_51_P215995  | 1.9 | 2.4.E-02 | <i>Zswim6</i>        | NM_145456    |
| A_51_P162676  | 1.9 | 1.6.E-02 | <i>Armc7</i>         | NM_177778    |
| A_66_P104296  | 1.9 | 3.3.E-02 | <i>1700112E06Rik</i> | NM_028275    |
| A_51_P389885  | 1.9 | 3.4.E-02 | <i>Spic</i>          | NM_011461    |
| A_55_P2124736 | 1.9 | 2.8.E-02 | <i>Col14a1</i>       | NM_181277    |
| A_55_P2035018 | 1.9 | 1.6.E-02 | <i>Clec4n</i>        | NM_020001    |
| A_51_P405606  | 1.9 | 3.3.E-02 | <i>Ndrp1</i>         | NM_008681    |
| A_55_P1953311 | 1.9 | 3.0.E-02 | <i>Stx2</i>          | NM_007941    |
| A_55_P2128853 | 1.9 | 4.0.E-02 | <i>Ear12</i>         | NM_001012766 |
| A_51_P112734  | 1.9 | 1.6.E-02 | <i>Slc7a8</i>        | NM_016972    |
| A_52_P391983  | 1.9 | 3.1.E-02 | <i>Nt5c2</i>         | NM_029810    |
| A_55_P1973046 | 1.9 | 2.0.E-02 | <i>Cttnbp2nl</i>     | NM_030249    |
| A_52_P143477  | 1.9 | 3.8.E-02 | <i>Tgoln1</i>        | NM_009443    |
| A_51_P449325  | 1.9 | 1.6.E-02 | <i>H2-Oa</i>         | NM_008206    |
| A_55_P2001048 | 1.9 | 4.2.E-02 | <i>Rom1</i>          | NM_009073    |
| A_55_P2110037 | 1.9 | 2.8.E-02 | <i>Akap7</i>         | NM_018747    |
| A_55_P2024654 | 1.9 | 3.8.E-02 | <i>Trrap</i>         | NM_001081362 |
| A_55_P1954086 | 1.9 | 2.9.E-02 | <i>Postn</i>         | NM_001198766 |
| A_55_P2126391 | 1.9 | 2.8.E-02 | <i>Srl</i>           | NM_175347    |
| A_55_P2067518 | 1.9 | 4.5.E-02 | <i>Slc13a3</i>       | NM_054055    |
| A_52_P559975  | 1.9 | 3.1.E-02 | <i>Cxcr2</i>         | NM_009909    |
| A_55_P1993463 | 1.9 | 4.1.E-02 | <i>N/A</i>           | N/A          |
| A_55_P2019300 | 1.9 | 1.5.E-02 | <i>Aim1l</i>         | NM_001162970 |
| A_51_P487690  | 1.9 | 3.3.E-02 | <i>Ifi44</i>         | NM_133871    |



|               |     |          |                     |              |
|---------------|-----|----------|---------------------|--------------|
| A_55_P2108678 | 1.9 | 4.7.E-02 | N/A                 | N/A          |
| A_55_P2066173 | 1.9 | 4.8.E-02 | N/A                 | S77453       |
| A_55_P2065991 | 1.9 | 2.0.E-02 | <i>S100a11</i>      | NM_016740    |
| A_52_P637282  | 1.9 | 1.5.E-02 | <i>Wipf1</i>        | NM_153138    |
| A_55_P2128492 | 1.9 | 2.6.E-02 | <i>Rap1a</i>        | NM_145541    |
| A_52_P305279  | 1.9 | 1.7.E-02 | <i>Spata13</i>      | NM_001033272 |
| A_51_P240864  | 1.9 | 2.2.E-02 | <i>Spp13</i>        | NM_029012    |
| A_55_P2012021 | 1.9 | 2.9.E-02 | <i>Olf1370</i>      | NM_146535    |
| A_51_P334104  | 1.9 | 2.5.E-02 | <i>Dcn</i>          | NM_007833    |
| A_52_P238902  | 1.9 | 3.2.E-02 | <i>1200011M11Ri</i> | NM_024262    |
| A_55_P2008860 | 1.9 | 2.5.E-02 | N/A                 | AK077358     |
| A_55_P2059958 | 1.9 | 1.8.E-02 | <i>Snx7</i>         | NM_029655    |
| A_55_P2162152 | 1.9 | 3.6.E-02 | N/A                 | N/A          |
| A_55_P2410586 | 1.9 | 2.6.E-02 | <i>9330156P08Ri</i> | AK034105     |
| A_55_P2118799 | 1.9 | 2.4.E-02 | <i>Rmi1</i>         | NM_001168248 |
| A_51_P388478  | 1.9 | 1.8.E-02 | <i>Efnb1</i>        | NM_010110    |
| A_51_P185247  | 1.9 | 2.9.E-02 | <i>Gdf10</i>        | NM_145741    |
| A_51_P205779  | 1.9 | 3.4.E-02 | <i>Cd5l</i>         | NM_009690    |
| A_51_P501803  | 1.9 | 2.4.E-02 | <i>Hoxa2</i>        | NM_010451    |
| A_55_P1961084 | 1.9 | 2.8.E-02 | <i>Map3k1</i>       | NM_011945    |
| A_51_P343913  | 1.9 | 3.4.E-02 | <i>Parp4</i>        | NM_001145978 |
| A_55_P2065866 | 1.9 | 1.9.E-02 | <i>Cygb</i>         | NM_030206    |
| A_52_P550843  | 1.9 | 2.0.E-02 | <i>Pppde1</i>       | NM_024282    |
| A_55_P2107347 | 1.9 | 4.9.E-02 | <i>Trove2</i>       | NM_013835    |
| A_51_P423008  | 1.9 | 2.2.E-02 | <i>Klhl7</i>        | NM_026448    |
| A_65_P18948   | 1.9 | 3.8.E-02 | <i>Ppm1h</i>        | NM_001110218 |
| A_55_P2060922 | 1.9 | 3.9.E-02 | <i>Unc5a</i>        | NM_153131    |
| A_66_P134474  | 1.9 | 2.7.E-02 | <i>Ang3</i>         | NM_001123394 |
| A_55_P2043782 | 1.9 | 4.5.E-02 | <i>Trpm1</i>        | NM_001039104 |
| A_55_P2011084 | 1.9 | 3.6.E-02 | <i>LOC100046632</i> | XM_001476227 |
| A_51_P264695  | 1.9 | 2.6.E-02 | <i>Crym</i>         | NM_016669    |
| A_55_P2034998 | 1.9 | 2.1.E-02 | <i>Tjp1</i>         | NM_009386    |
| A_55_P1986053 | 1.9 | 3.0.E-02 | <i>Pcnx</i>         | NM_018814    |
| A_51_P212754  | 1.9 | 2.1.E-02 | <i>Tgfb1</i>        | NM_009369    |
| A_55_P2181976 | 1.9 | 4.1.E-02 | <i>Akap11</i>       | NM_001164503 |
| A_51_P519251  | 1.9 | 3.0.E-02 | <i>Nupr1</i>        | NM_019738    |
| A_51_P253481  | 1.9 | 3.0.E-02 | <i>Ces1g</i>        | NM_021456    |
| A_55_P2048398 | 1.9 | 2.4.E-02 | <i>Suv420h1</i>     | NM_001167885 |
| A_55_P2169694 | 1.9 | 2.7.E-02 | N/A                 | N/A          |
| A_55_P2212733 | 1.9 | 4.1.E-02 | <i>C80012</i>       | BG079846     |
| A_51_P222467  | 1.9 | 3.6.E-02 | <i>Abcg1</i>        | NM_009593    |

|               |     |          |                      |              |
|---------------|-----|----------|----------------------|--------------|
| A_51_P354165  | 1.9 | 1.9.E-02 | <i>Apcs</i>          | NM_011318    |
| A_55_P2090798 | 1.9 | 3.6.E-02 | <i>Mtus1</i>         | NM_001005863 |
| A_55_P2151685 | 1.9 | 3.0.E-02 | <i>Pira11</i>        | NM_011088    |
| A_55_P2450933 | 1.9 | 1.8.E-02 | <i>N4bp2l2</i>       | NM_201369    |
| A_55_P2022678 | 1.9 | 4.8.E-02 | <i>C1qtnf1</i>       | NM_001204129 |
| A_55_P1987396 | 1.9 | 2.0.E-02 | <i>Tbl1xr1</i>       | NM_030732    |
| A_52_P551707  | 1.9 | 2.4.E-02 | <i>Kdm6a</i>         | NM_009483    |
| A_51_P382970  | 1.9 | 3.2.E-02 | <i>Itga9</i>         | NM_133721    |
| A_55_P2013833 | 1.8 | 3.4.E-02 | <i>Ddx3x</i>         | NM_010028    |
| A_52_P302071  | 1.8 | 2.7.E-02 | N/A                  | N/A          |
| A_55_P2081055 | 1.8 | 4.4.E-02 | <i>1700056E22Rik</i> | NM_028516    |
| A_55_P2128672 | 1.8 | 3.5.E-02 | <i>Ikbip</i>         | NM_027078    |
| A_55_P2028268 | 1.8 | 3.3.E-02 | <i>Pik3cd</i>        | NM_001164051 |
| A_55_P2123381 | 1.8 | 3.5.E-02 | <i>Fga</i>           | NM_010196    |
| A_55_P2142499 | 1.8 | 3.3.E-02 | N/A                  | FM179586     |
| A_51_P100625  | 1.8 | 3.0.E-02 | <i>Apon</i>          | NM_133996    |
| A_55_P2051229 | 1.8 | 2.9.E-02 | <i>Gpr132</i>        | NM_019925    |
| A_51_P308844  | 1.8 | 1.8.E-02 | <i>Nrn1</i>          | NM_153529    |
| A_51_P489452  | 1.8 | 2.3.E-02 | <i>Cdo1</i>          | NM_033037    |
| A_55_P2068233 | 1.8 | 3.3.E-02 | <i>Phactr1</i>       | NM_001005748 |
| A_55_P2074972 | 1.8 | 2.0.E-02 | <i>Zswim6</i>        | NM_145456    |
| A_51_P246166  | 1.8 | 2.6.E-02 | <i>Expi</i>          | NM_007969    |
| A_55_P2087295 | 1.8 | 2.9.E-02 | <i>Gm4022</i>        | AK015147     |
| A_55_P2182273 | 1.8 | 2.4.E-02 | N/A                  | N/A          |
| A_66_P110798  | 1.8 | 3.1.E-02 | N/A                  | AK145507     |
| A_55_P2062602 | 1.8 | 2.7.E-02 | <i>4932438A13Rik</i> | NM_172679    |
| A_55_P2107192 | 1.8 | 2.1.E-02 | N/A                  | N/A          |
| A_51_P323531  | 1.8 | 2.1.E-02 | <i>Fam71e1</i>       | NM_028169    |
| A_52_P672803  | 1.8 | 2.8.E-02 | <i>Ctsa</i>          | NM_008906    |
| A_55_P2046550 | 1.8 | 4.8.E-02 | <i>Adamts8</i>       | NM_013906    |
| A_55_P1954216 | 1.8 | 2.1.E-02 | <i>Ugt3a1</i>        | NM_207216    |
| A_55_P1999561 | 1.8 | 3.6.E-02 | <i>Pram1</i>         | NM_001002842 |
| A_55_P2033282 | 1.8 | 3.0.E-02 | <i>Cept1</i>         | NM_133869    |
| A_51_P249215  | 1.8 | 2.5.E-02 | <i>Ptger2</i>        | NM_008964    |
| A_52_P311853  | 1.8 | 2.5.E-02 | <i>Ddit4l</i>        | NM_030143    |
| A_55_P2109382 | 1.8 | 1.6.E-02 | <i>Adora2a</i>       | NM_009630    |
| A_55_P1992475 | 1.8 | 2.3.E-02 | N/A                  | N/A          |
| A_52_P99888   | 1.8 | 2.0.E-02 | <i>Cxcl16</i>        | NM_023158    |
| A_52_P177293  | 1.8 | 1.9.E-02 | <i>Snx24</i>         | NM_029394    |
| A_52_P275627  | 1.8 | 2.6.E-02 | <i>Kpnb1</i>         | NM_008379    |
| A_55_P1997837 | 1.8 | 1.9.E-02 | <i>Osbp2</i>         | NM_152818    |

|               |     |                              |              |
|---------------|-----|------------------------------|--------------|
| A_55_P2011937 | 1.8 | 4.4.E-02 <i>Fignl1</i>       | NM_001163359 |
| A_55_P1955632 | 1.8 | 2.9.E-02 <i>Trp53i11</i>     | NM_001025246 |
| A_55_P1962011 | 1.8 | 4.5.E-02 <i>Clec1b</i>       | NM_019985    |
| A_52_P653966  | 1.8 | 2.8.E-02 <i>Atf7ip</i>       | NM_019426    |
| A_55_P1957413 | 1.8 | 2.4.E-02 <i>Lsp1</i>         | NM_019391    |
| A_55_P2067366 | 1.8 | 2.9.E-02 <i>Zfp827</i>       | BC094552     |
| A_51_P142153  | 1.8 | 1.9.E-02 <i>Filip1l</i>      | NM_001040397 |
| A_55_P2146034 | 1.8 | 2.2.E-02 <i>Abca4</i>        | NM_007378    |
| A_55_P2171658 | 1.8 | 3.2.E-02 <i>Stx3</i>         | NM_152220    |
| A_55_P1971483 | 1.8 | 2.9.E-02 <i>4932438A13Ri</i> | NM_172679    |
| A_52_P459929  | 1.8 | 2.4.E-02 <i>Itga1</i>        | NM_001033228 |
| A_66_P107038  | 1.8 | 2.5.E-02 <i>Prpc</i>         | NM_028243    |
| A_55_P1994042 | 1.8 | 2.1.E-02 <i>Zbp1</i>         | NM_001139519 |
| A_52_P289213  | 1.8 | 4.4.E-02 <i>Notch2</i>       | NM_010928    |
| A_52_P97670   | 1.8 | 4.0.E-02 <i>Atad2b</i>       | NM_001099628 |
| A_55_P2010003 | 1.8 | 2.1.E-02 <i>Zfp113</i>       | NM_019747    |
| A_55_P2189461 | 1.8 | 3.1.E-02 <i>LOC100504699</i> | XR_104814    |
| A_55_P2104327 | 1.8 | 3.5.E-02 <i>Pxdn</i>         | NM_181395    |
| A_52_P111963  | 1.8 | 2.9.E-02 <i>1810030007Ri</i> | NM_175141    |
| A_66_P105689  | 1.8 | 4.9.E-02 <i>Trim34a</i>      | NM_030684    |
| A_51_P455647  | 1.8 | 2.5.E-02 <i>Car2</i>         | NM_009801    |
| A_52_P506529  | 1.8 | 3.4.E-02 <i>Rabgap1l</i>     | NM_001038621 |
| A_55_P1954569 | 1.8 | 2.4.E-02 <i>Hmgcs1</i>       | AK031297     |
| A_55_P2109033 | 1.8 | 2.0.E-02 <i>Hmgcs2</i>       | NM_008256    |
| A_55_P2115364 | 1.8 | 4.1.E-02 <i>N/A</i>          | N/A          |
| A_51_P192089  | 1.8 | 3.3.E-02 <i>Pinx1</i>        | NM_028228    |
| A_55_P2163928 | 1.8 | 3.6.E-02 <i>Cxx1c</i>        | NM_028375    |
| A_52_P637812  | 1.8 | 2.6.E-02 <i>Prrg4</i>        | NM_178695    |
| A_55_P2000623 | 1.8 | 2.4.E-02 <i>Stag1</i>        | NM_009282    |
| A_55_P2007964 | 1.8 | 2.9.E-02 <i>Cx3cr1</i>       | NM_009987    |
| A_52_P66199   | 1.8 | 2.2.E-02 <i>Fbxo11</i>       | NM_001081034 |
| A_55_P1960097 | 1.8 | 2.1.E-02 <i>Epb4.1l3</i>     | NM_013813    |
| A_52_P465129  | 1.8 | 3.2.E-02 <i>N/A</i>          | N/A          |
| A_55_P2024461 | 1.8 | 2.5.E-02 <i>Tbkbp1</i>       | NM_198100    |
| A_55_P2005145 | 1.8 | 4.2.E-02 <i>Zfp455</i>       | NM_001048204 |
| A_51_P410918  | 1.8 | 3.9.E-02 <i>A830007P12Ri</i> | NM_146115    |
| A_55_P2159600 | 1.8 | 2.9.E-02 <i>Herc1</i>        | NM_145617    |
| A_55_P1991219 | 1.8 | 2.5.E-02 <i>Stat3</i>        | NM_011486    |
| A_55_P1966863 | 1.8 | 3.5.E-02 <i>Mad2l2</i>       | NM_027985    |
| A_55_P2021465 | 1.8 | 1.9.E-02 <i>Phldb2</i>       | NM_153412    |
| A_51_P402193  | 1.8 | 3.5.E-02 <i>Map3k1</i>       | NM_011945    |

|               |     |          |                     |              |
|---------------|-----|----------|---------------------|--------------|
| A_55_P1990346 | 1.8 | 3.8.E-02 | <i>Adamdec1</i>     | NM_021475    |
| A_52_P539161  | 1.8 | 4.2.E-02 | <i>Rdh11</i>        | NM_021557    |
| A_55_P1960566 | 1.8 | 2.4.E-02 | <i>Csda</i>         | NM_139117    |
| A_66_P108770  | 1.8 | 3.1.E-02 | <i>Oxct1</i>        | NM_024188    |
| A_55_P2058942 | 1.8 | 2.6.E-02 | <i>Aldh3b1</i>      | NM_026316    |
| A_55_P2024953 | 1.8 | 4.2.E-02 | <i>Tbc1d4</i>       | NM_001081278 |
| A_52_P95910   | 1.8 | 2.2.E-02 | <i>Ugcg</i>         | NM_011673    |
| A_51_P227392  | 1.8 | 3.2.E-02 | <i>Rhou</i>         | NM_133955    |
| A_55_P2159294 | 1.8 | 2.7.E-02 | N/A                 | N/A          |
| A_55_P2048279 | 1.8 | 3.1.E-02 | <i>Tlr13</i>        | NM_205820    |
| A_55_P1965892 | 1.8 | 4.1.E-02 | <i>Gnpda1</i>       | NM_011937    |
| A_51_P423578  | 1.8 | 1.9.E-02 | <i>Sifn2</i>        | NM_011408    |
| A_55_P2018994 | 1.8 | 3.0.E-02 | <i>Elk3</i>         | NM_013508    |
| A_55_P2054420 | 1.8 | 3.1.E-02 | <i>Tcf4</i>         | NM_013685    |
| A_51_P131358  | 1.8 | 3.0.E-02 | <i>Selplg</i>       | NM_009151    |
| A_51_P230439  | 1.8 | 2.7.E-02 | <i>Ppfibp2</i>      | NM_008905    |
| A_52_P600531  | 1.8 | 3.5.E-02 | <i>Bahd1</i>        | NM_001045523 |
| A_66_P108345  | 1.8 | 2.8.E-02 | <i>Sgcb</i>         | NM_011890    |
| A_55_P2097670 | 1.8 | 3.1.E-02 | N/A                 | XR_035219    |
| A_55_P2313033 | 1.8 | 2.3.E-02 | <i>Ptprb</i>        | NM_029928    |
| A_55_P2113837 | 1.8 | 2.6.E-02 | <i>Tbc1d1</i>       | NM_019636    |
| A_51_P307316  | 1.8 | 3.0.E-02 | <i>Syde1</i>        | NM_027875    |
| A_55_P1970910 | 1.8 | 3.5.E-02 | <i>Stard13</i>      | NM_001163493 |
| A_51_P410650  | 1.8 | 3.3.E-02 | <i>Dpp9</i>         | NM_172624    |
| A_52_P183038  | 1.8 | 3.0.E-02 | <i>Impdh1</i>       | NM_011829    |
| A_55_P2023797 | 1.8 | 3.1.E-02 | <i>Ccdc46</i>       | NM_029606    |
| A_51_P354038  | 1.8 | 3.3.E-02 | <i>Tmc6</i>         | NM_145439    |
| A_55_P2148321 | 1.8 | 2.0.E-02 | <i>Gm15401</i>      | XM_003084665 |
| A_51_P202050  | 1.8 | 3.2.E-02 | <i>Dtx1</i>         | NM_008052    |
| A_55_P2163774 | 1.8 | 3.9.E-02 | <i>Crip1</i>        | NM_007763    |
| A_55_P2007249 | 1.8 | 3.0.E-02 | <i>Spdef</i>        | NM_013891    |
| A_55_P1952216 | 1.8 | 3.5.E-02 | N/A                 | N/A          |
| A_55_P2001970 | 1.8 | 4.3.E-02 | <i>6330408A02Ri</i> | NM_177312    |
| A_51_P290018  | 1.8 | 5.0.E-02 | <i>Ddx3x</i>        | U42386       |
| A_52_P493091  | 1.8 | 4.1.E-02 | <i>Fmr1</i>         | NM_008031    |
| A_55_P2431118 | 1.8 | 5.0.E-02 | <i>Itsn1</i>        | NM_001110275 |
| A_55_P1971963 | 1.8 | 3.8.E-02 | <i>Tmem176b</i>     | NM_023056    |
| A_55_P2038525 | 1.8 | 2.6.E-02 | <i>C3</i>           | NM_009778    |
| A_52_P680761  | 1.8 | 2.4.E-02 | <i>Tdrd6</i>        | NM_198418    |
| A_52_P684138  | 1.8 | 4.7.E-02 | <i>Dpf3</i>         | NM_058212    |
| A_52_P234729  | 1.8 | 3.9.E-02 | <i>Pkd2</i>         | NM_008861    |

|               |     |          |                     |                    |
|---------------|-----|----------|---------------------|--------------------|
| A_55_P2119985 | 1.8 | 2.6.E-02 | <i>Baiap2</i>       | NM_130862          |
| A_55_P2091985 | 1.8 | 4.2.E-02 | <i>Gpr157</i>       | NM_177366          |
| A_51_P259009  | 1.8 | 2.7.E-02 | <i>Cacnb3</i>       | NM_007581          |
| A_55_P2061076 | 1.8 | 4.8.E-02 | <i>Gm3219</i>       | NR_027380          |
| A_55_P2169259 | 1.8 | 3.2.E-02 | <i>Cyp3a25</i>      | NM_019792          |
| A_51_P104891  | 1.8 | 3.5.E-02 | <i>Ept1</i>         | NM_027652          |
| A_55_P2079425 | 1.8 | 2.0.E-02 | <i>Spred1</i>       | NM_033524          |
| A_51_P267239  | 1.8 | 2.7.E-02 | <i>Litaf</i>        | NM_019980          |
| A_55_P2152487 | 1.7 | 4.0.E-02 | <i>Gapdhs</i>       | NM_008085          |
| A_55_P1968668 | 1.7 | 3.3.E-02 | <i>1700020O03Ri</i> | NM_027405          |
| A_51_P365019  | 1.7 | 3.7.E-02 | <i>Gclc</i>         | NM_010295          |
| A_51_P202033  | 1.7 | 2.6.E-02 | <i>Wls</i>          | NM_026582          |
| A_52_P682745  | 1.7 | 3.4.E-02 | <i>Dock4</i>        | NM_172803          |
| A_55_P2010567 | 1.7 | 4.1.E-02 | <i>N/A</i>          | N/A                |
| A_55_P2341468 | 1.7 | 2.3.E-02 | <i>Rbms3</i>        | NM_001172123       |
| A_51_P337230  | 1.7 | 3.0.E-02 | <i>Galnt14</i>      | NM_027864          |
| A_51_P144160  | 1.7 | 3.3.E-02 | <i>Colec10</i>      | NM_173422          |
| A_51_P112627  | 1.7 | 3.3.E-02 | <i>St6galnac2</i>   | NM_009180          |
| A_55_P2007871 | 1.7 | 3.3.E-02 | <i>Ptpdc1</i>       | NM_207232          |
| A_51_P494675  | 1.7 | 3.5.E-02 | <i>Cotl1</i>        | NM_028071          |
| A_51_P234113  | 1.7 | 2.7.E-02 | <i>Nod1</i>         | NM_172729          |
| A_55_P2021114 | 1.7 | 4.6.E-02 | <i>Ier5</i>         | NM_010500          |
| A_52_P89425   | 1.7 | 3.0.E-02 | <i>Pcnt</i>         | NM_008787          |
| A_66_P116299  | 1.7 | 2.6.E-02 | <i>Pias1</i>        | NM_019663          |
| A_51_P342877  | 1.7 | 2.6.E-02 | <i>Scn1b</i>        | NM_011322          |
| A_55_P2155002 | 1.7 | 3.4.E-02 | <i>Ccdc23</i>       | NM_001038998       |
| A_55_P2066180 | 1.7 | 4.4.E-02 | <i>C630004H02Ri</i> | NM_175454          |
| A_55_P2078670 | 1.7 | 2.6.E-02 | <i>Cbs</i>          | NM_144855          |
| A_52_P350148  | 1.7 | 3.3.E-02 | <i>Celsr2</i>       | NM_001004177       |
| A_55_P1988882 | 1.7 | 2.6.E-02 |                     | 9-Sep NM_001113487 |
| A_55_P1958678 | 1.7 | 3.2.E-02 | <i>Brd2</i>         | NM_001204973       |
| A_66_P135165  | 1.7 | 2.5.E-02 | <i>Nfib</i>         | NM_001113209       |
| A_55_P1980486 | 1.7 | 4.1.E-02 | <i>N/A</i>          | N/A                |
| A_52_P681310  | 1.7 | 3.1.E-02 | <i>Plaur</i>        | NM_011113          |
| A_55_P2089804 | 1.7 | 2.8.E-02 | <i>Atf7</i>         | NM_146065          |
| A_51_P135340  | 1.7 | 3.8.E-02 | <i>Panx1</i>        | NM_019482          |
| A_52_P70796   | 1.7 | 2.6.E-02 | <i>Cxcr5</i>        | NM_007551          |
| A_51_P279100  | 1.7 | 2.5.E-02 | <i>Ptgs1</i>        | NM_008969          |
| A_55_P2083988 | 1.7 | 4.5.E-02 | <i>Lmo2</i>         | NM_008505          |
| A_66_P133642  | 1.7 | 4.3.E-02 | <i>N/A</i>          | N/A                |
| A_51_P309740  | 1.7 | 3.6.E-02 | <i>Usp40</i>        | NM_001033291       |

|               |     |          |                     |              |
|---------------|-----|----------|---------------------|--------------|
| A_52_P595954  | 1.7 | 4.5.E-02 | <i>Whsc2</i>        | NM_011914    |
| A_51_P182993  | 1.7 | 4.7.E-02 | <i>Map3k2</i>       | NM_011946    |
| A_55_P2034110 | 1.7 | 3.9.E-02 | <i>Tgm2</i>         | NM_009373    |
| A_51_P394788  | 1.7 | 2.6.E-02 | <i>Actn4</i>        | NM_021895    |
| A_55_P1984635 | 1.7 | 4.5.E-02 | <i>Parp4</i>        | NM_001145978 |
| A_55_P2136970 | 1.7 | 4.8.E-02 | <i>Gm7269</i>       | XM_993534    |
| A_52_P354744  | 1.7 | 4.0.E-02 | <i>Slc2a3</i>       | NM_011401    |
| A_52_P618379  | 1.7 | 3.9.E-02 | <i>Slc35a5</i>      | NM_028756    |
| A_55_P2088571 | 1.7 | 2.3.E-02 | <i>Repin1</i>       | NM_001079901 |
| A_55_P2007372 | 1.7 | 3.9.E-02 | N/A                 | N/A          |
| A_52_P269158  | 1.7 | 2.6.E-02 | <i>Pid1</i>         | NM_001003948 |
| A_55_P2008740 | 1.7 | 3.8.E-02 | <i>Fcgr1</i>        | NM_010186    |
| A_55_P2269497 | 1.7 | 2.9.E-02 | <i>Pdp1</i>         | NM_001098230 |
| A_55_P2028894 | 1.7 | 3.7.E-02 | <i>Gata4</i>        | NM_008092    |
| A_51_P414653  | 1.7 | 4.2.E-02 | <i>Plvap</i>        | NM_032398    |
| A_55_P2079561 | 1.7 | 2.8.E-02 | <i>Lilra6</i>       | NM_011090    |
| A_55_P2008061 | 1.7 | 4.0.E-02 | <i>Itpr2</i>        | NM_019923    |
| A_55_P2081530 | 1.7 | 2.9.E-02 | <i>Sh3bgrl3</i>     | NM_080559    |
| A_51_P187082  | 1.7 | 4.1.E-02 | <i>G6pdx</i>        | NM_008062    |
| A_55_P2081656 | 1.7 | 4.5.E-02 | N/A                 | N/A          |
| A_55_P2149931 | 1.7 | 3.5.E-02 | <i>Arap2</i>        | NM_178407    |
| A_55_P1973848 | 1.7 | 2.9.E-02 | <i>Sema4b</i>       | NM_013659    |
| A_55_P2136204 | 1.7 | 4.1.E-02 | <i>Rnf38</i>        | NM_175201    |
| A_55_P2067533 | 1.7 | 4.7.E-02 | <i>Foxa2</i>        | NM_010446    |
| A_51_P383991  | 1.7 | 4.6.E-02 | <i>4-Sep</i>        | NM_011129    |
| A_52_P127130  | 1.7 | 3.8.E-02 | <i>Msr1</i>         | NM_031195    |
| A_52_P6798    | 1.7 | 3.7.E-02 | <i>Rbm22</i>        | NM_025776    |
| A_55_P2069306 | 1.7 | 3.0.E-02 | <i>Ptpn18</i>       | NM_011206    |
| A_51_P342567  | 1.7 | 4.9.E-02 | <i>Akap12</i>       | NM_031185    |
| A_51_P370350  | 1.7 | 2.9.E-02 | <i>Galnt2</i>       | NM_139272    |
| A_55_P2275279 | 1.7 | 4.4.E-02 | <i>Mid2</i>         | NM_011845    |
| A_55_P2108255 | 1.7 | 2.9.E-02 | <i>Lgmn</i>         | NM_011175    |
| A_55_P1963724 | 1.7 | 3.5.E-02 | N/A                 | N/A          |
| A_51_P150722  | 1.7 | 4.8.E-02 | <i>Lyst</i>         | NM_010748    |
| A_66_P122559  | 1.7 | 3.5.E-02 | <i>Myct1</i>        | NM_026793    |
| A_55_P2023818 | 1.7 | 3.0.E-02 | <i>Cysltr1</i>      | NM_021476    |
| A_55_P2129354 | 1.7 | 4.7.E-02 | <i>Pilra</i>        | NM_153510    |
| A_51_P234788  | 1.7 | 3.7.E-02 | <i>Cxxc5</i>        | NM_133687    |
| A_55_P2180071 | 1.7 | 2.6.E-02 | <i>Zfand5</i>       | NM_009551    |
| A_55_P1983868 | 1.7 | 3.3.E-02 | <i>4933428M09Ri</i> | XM_001473792 |
| A_55_P2096827 | 1.7 | 3.1.E-02 | <i>Art3</i>         | NM_181728    |

|               |     |          |                      |              |
|---------------|-----|----------|----------------------|--------------|
| A_55_P2093439 | 1.7 | 3.0.E-02 | <i>Mex3d</i>         | NM_198615    |
| A_55_P2001920 | 1.7 | 3.1.E-02 | <i>Flna</i>          | NM_010227    |
| A_51_P405476  | 1.7 | 3.9.E-02 | <i>Fcer1g</i>        | NM_010185    |
| A_55_P2049572 | 1.7 | 3.9.E-02 | <i>Pld2</i>          | NM_008876    |
| A_51_P363749  | 1.7 | 3.1.E-02 | <i>Irf6</i>          | NM_016851    |
| A_66_P118233  | 1.7 | 3.5.E-02 | <i>Hnrnpa0</i>       | NM_029872    |
| A_55_P1990324 | 1.7 | 2.8.E-02 | <i>Ptprc</i>         | NM_001111316 |
| A_55_P2069231 | 1.7 | 4.8.E-02 | <i>AI429214</i>      | NM_001039220 |
| A_52_P364140  | 1.7 | 4.9.E-02 | <i>Itga5</i>         | NM_010577    |
| A_51_P246773  | 1.7 | 3.3.E-02 | <i>Sesn3</i>         | NM_030261    |
| A_55_P2122688 | 1.7 | 4.1.E-02 | <i>Zmym3</i>         | NM_019831    |
| A_55_P2106820 | 1.7 | 4.8.E-02 | N/A                  | N/A          |
| A_55_P2024041 | 1.7 | 4.5.E-02 | <i>Psg19</i>         | NM_011964    |
| A_55_P2043382 | 1.7 | 3.0.E-02 | <i>Ligl2</i>         | NM_145438    |
| A_55_P2154709 | 1.7 | 2.8.E-02 | <i>Pter</i>          | NM_008961    |
| A_55_P1963002 | 1.7 | 4.5.E-02 | <i>Ppfia4</i>        | NM_001144855 |
| A_51_P465148  | 1.7 | 3.1.E-02 | <i>Ctsb</i>          | NM_007798    |
| A_51_P210082  | 1.7 | 3.1.E-02 | <i>Ercc4</i>         | NM_015769    |
| A_52_P479269  | 1.7 | 3.9.E-02 | <i>Sdc1</i>          | NM_011519    |
| A_55_P2125229 | 1.7 | 4.4.E-02 | <i>Arhgef2</i>       | NM_001198911 |
| A_66_P118513  | 1.7 | 3.6.E-02 | <i>11-Sep</i>        | NM_001009818 |
| A_55_P1988183 | 1.7 | 4.3.E-02 | <i>Cdkn2b</i>        | NM_007670    |
| A_55_P2009567 | 1.7 | 4.6.E-02 | <i>Rod1</i>          | NM_144904    |
| A_51_P487501  | 1.7 | 4.9.E-02 | <i>Mobkl1b</i>       | AK167515     |
| A_51_P474169  | 1.7 | 3.5.E-02 | <i>5430407P10Ril</i> | NM_144883    |
| A_52_P473953  | 1.7 | 4.7.E-02 | <i>Ctdspl</i>        | NM_133710    |
| A_51_P104569  | 1.7 | 4.3.E-02 | <i>Olf148</i>        | NM_146505    |
| A_52_P612382  | 1.7 | 3.8.E-02 | <i>Cdc25b</i>        | NM_023117    |
| A_55_P2043987 | 1.7 | 4.3.E-02 | <i>Luzp1</i>         | NM_024452    |
| A_55_P2077666 | 1.7 | 3.4.E-02 | <i>Porcn</i>         | NM_023638    |
| A_55_P2007876 | 1.7 | 4.2.E-02 | <i>Rnf144b</i>       | NM_146042    |
| A_51_P433026  | 1.7 | 4.2.E-02 | <i>Ppapdc2</i>       | NM_028922    |
| A_55_P2133100 | 1.7 | 2.9.E-02 | <i>Ccdc50</i>        | NM_026202    |
| A_55_P2060107 | 1.7 | 3.3.E-02 | <i>Pkm2</i>          | NM_011099    |
| A_52_P197627  | 1.7 | 3.9.E-02 | <i>Umps</i>          | NM_009471    |
| A_51_P440238  | 1.7 | 3.3.E-02 | <i>Ggt6</i>          | NM_027819    |
| A_51_P382484  | 1.7 | 4.6.E-02 | <i>Itgav</i>         | NM_008402    |
| A_55_P1992045 | 1.7 | 4.4.E-02 | <i>Msi2</i>          | NM_054043    |
| A_55_P2148708 | 1.7 | 3.0.E-02 | N/A                  | N/A          |
| A_55_P2072631 | 1.7 | 4.0.E-02 | <i>Prr5l</i>         | NM_001083810 |
| A_55_P2181341 | 1.7 | 3.6.E-02 | <i>Ecell1</i>        | NM_021306    |

|               |     |          |                     |              |
|---------------|-----|----------|---------------------|--------------|
| A_51_P357573  | 1.7 | 3.9.E-02 | <i>Cald1</i>        | NM_145575    |
| A_51_P150678  | 1.7 | 3.5.E-02 | <i>Tnfaip8l2</i>    | NM_027206    |
| A_55_P2098071 | 1.6 | 3.6.E-02 | <i>Trim25</i>       | NM_009546    |
| A_55_P2063661 | 1.6 | 3.9.E-02 | <i>Tmem168</i>      | NM_028990    |
| A_55_P2120055 | 1.6 | 3.5.E-02 | <i>Fgfr4</i>        | NM_008011    |
| A_55_P1984158 | 1.6 | 3.1.E-02 | <i>Slc44a2</i>      | NM_152808    |
| A_52_P302395  | 1.6 | 3.3.E-02 | <i>Lnpep</i>        | NM_172827    |
| A_52_P622442  | 1.6 | 3.2.E-02 | <i>Pdcl3</i>        | NM_026850    |
| A_51_P327874  | 1.6 | 4.3.E-02 | <i>Pth1r</i>        | NM_011199    |
| A_51_P371091  | 1.6 | 2.9.E-02 | <i>Rcsd1</i>        | NM_178593    |
| A_55_P1964228 | 1.6 | 4.2.E-02 | <i>Elac1</i>        | NM_053255    |
| A_52_P114722  | 1.6 | 4.3.E-02 | <i>Ptpn6</i>        | NM_001077705 |
| A_55_P2026863 | 1.6 | 4.4.E-02 | <i>Trim32</i>       | NM_053084    |
| A_55_P1994052 | 1.6 | 3.9.E-02 | <i>Asxl1</i>        | NM_001039939 |
| A_51_P480928  | 1.6 | 3.3.E-02 | <i>Zfyve16</i>      | NM_173392    |
| A_51_P178828  | 1.6 | 4.7.E-02 | <i>Mbl2</i>         | NM_010776    |
| A_51_P132081  | 1.6 | 3.9.E-02 | <i>Rsl1</i>         | NM_001013769 |
| A_51_P415809  | 1.6 | 3.8.E-02 | <i>Tusc1</i>        | NM_026954    |
| A_55_P2137299 | 1.6 | 4.6.E-02 | <i>Dnmbp</i>        | NM_028029    |
| A_55_P2041011 | 1.6 | 4.1.E-02 | <i>Slc2a13</i>      | NM_001033633 |
| A_55_P2176753 | 1.6 | 3.2.E-02 | N/A                 | N/A          |
| A_55_P1970763 | 1.6 | 4.3.E-02 | <i>Pilrb2</i>       | NM_001024932 |
| A_55_P1957633 | 1.6 | 3.5.E-02 | <i>Gpsm3</i>        | NM_134116    |
| A_55_P2160094 | 1.6 | 4.4.E-02 | <i>Plscr2</i>       | NM_001195084 |
| A_55_P2089310 | 1.6 | 4.1.E-02 | <i>2900097C17Ri</i> | NR_024329    |
| A_65_P15812   | 1.6 | 4.8.E-02 | <i>Pum1</i>         | NM_030722    |
| A_55_P2275817 | 1.6 | 4.4.E-02 | <i>C430042M11Ri</i> | AK049571     |
| A_55_P1998506 | 1.6 | 4.2.E-02 | <i>Ap1f</i>         | NM_001170489 |
| A_55_P2097560 | 1.6 | 3.2.E-02 | N/A                 | N/A          |
| A_55_P1961863 | 1.6 | 3.8.E-02 | <i>Pcdhga9</i>      | NM_033592    |
| A_51_P394735  | 1.6 | 4.6.E-02 | <i>Arhgef18</i>     | NM_133962    |
| A_55_P1995045 | 1.6 | 4.4.E-02 | <i>Zc3hav1</i>      | NM_028864    |
| A_55_P2098880 | 1.6 | 4.7.E-02 | <i>Galnt10</i>      | NM_134189    |
| A_55_P2074831 | 1.6 | 4.7.E-02 | <i>Fam168a</i>      | NM_178764    |
| A_55_P2130525 | 1.6 | 3.5.E-02 | <i>2700007P21Ri</i> | AK165082     |
| A_55_P2024337 | 1.6 | 4.2.E-02 | <i>Tmem53</i>       | NM_026837    |
| A_55_P2183208 | 1.6 | 4.7.E-02 | <i>Prl2c1</i>       | NM_001045532 |
| A_55_P2044932 | 1.6 | 4.5.E-02 | <i>Gpr84</i>        | NM_030720    |
| A_55_P2162880 | 1.6 | 4.8.E-02 | <i>Cyp3a57</i>      | NM_001100180 |
| A_51_P329928  | 1.6 | 4.9.E-02 | <i>Phlda3</i>       | NM_013750    |
| A_51_P157255  | 1.6 | 4.8.E-02 | <i>Sdc2</i>         | NM_008304    |



|               |     |          |                 |              |
|---------------|-----|----------|-----------------|--------------|
| A_55_P1952720 | 1.6 | 4.0.E-02 | <i>Kctd2</i>    | NM_183285    |
| A_51_P156927  | 1.6 | 3.9.E-02 | <i>Arid4a</i>   | NM_001081195 |
| A_52_P354298  | 1.6 | 3.5.E-02 | <i>Ap2a2</i>    | NM_007459    |
| A_51_P279163  | 1.6 | 4.1.E-02 | <i>Plcg2</i>    | NM_172285    |
| A_55_P1966109 | 1.6 | 4.8.E-02 | <i>Epn2</i>     | NM_010148    |
| A_55_P2024530 | 1.6 | 3.6.E-02 | <i>Siah2</i>    | NM_009174    |
| A_55_P2075996 | 1.6 | 3.6.E-02 | <i>Cpne1</i>    | NM_170588    |
| A_55_P2130178 | 1.6 | 4.9.E-02 | <i>Fn1</i>      | NM_010233    |
| A_55_P1990964 | 1.6 | 3.8.E-02 | <i>Osbpl11</i>  | NM_176840    |
| A_55_P2094852 | 1.6 | 4.9.E-02 | <i>Rabep1</i>   | NM_019400    |
| A_55_P1980583 | 1.6 | 4.3.E-02 | <i>Leprot</i>   | NM_175036    |
| A_55_P1960187 | 1.6 | 4.3.E-02 | N/A             | N/A          |
| A_55_P2107957 | 1.6 | 4.5.E-02 | <i>Fam175a</i>  | NM_172405    |
| A_51_P124236  | 1.6 | 5.0.E-02 | <i>Olfir381</i> | NM_147022    |
| A_51_P282227  | 1.6 | 4.3.E-02 | <i>As3mt</i>    | NM_020577    |
| A_55_P1989981 | 1.6 | 4.5.E-02 | <i>Fam129b</i>  | NM_146119    |
| A_55_P2181752 | 1.6 | 4.1.E-02 | <i>Apol7b</i>   | N/A          |
| A_51_P258409  | 1.6 | 4.1.E-02 | <i>Hey1</i>     | NM_010423    |
| A_55_P2167984 | 1.6 | 4.9.E-02 | <i>Mmd</i>      | N/A          |
| A_55_P2049479 | 1.6 | 4.5.E-02 | <i>Sh3bp5</i>   | AK165033     |
| A_51_P127297  | 1.6 | 4.5.E-02 | <i>Hsd11b1</i>  | NM_008288    |
| A_52_P491861  | 1.6 | 4.2.E-02 | <i>Stag1</i>    | NM_009282    |
| A_55_P2083889 | 1.6 | 4.4.E-02 | <i>Pea15a</i>   | NM_011063    |
| A_55_P2038597 | 1.6 | 4.7.E-02 | N/A             | N/A          |
| A_52_P216613  | 1.6 | 4.4.E-02 | <i>Gpr18</i>    | NM_182806    |
| A_55_P1959425 | 1.6 | 4.5.E-02 | <i>Slc16a3</i>  | NM_030696    |
| A_51_P378298  | 1.6 | 4.6.E-02 | <i>Faim3</i>    | NM_026976    |
| A_55_P2228918 | 1.6 | 4.4.E-02 | <i>Rslcan18</i> | AK041843     |
| A_55_P2185605 | 1.6 | 4.4.E-02 | <i>Cd48</i>     | NM_007649    |
| A_51_P509971  | 1.6 | 4.6.E-02 | <i>Plekho1</i>  | NM_023320    |
| A_55_P2053206 | 1.6 | 4.7.E-02 | <i>Kdm4c</i>    | NM_144787    |
| A_55_P1983006 | 1.6 | 4.3.E-02 | <i>Hdac5</i>    | NM_001077696 |
| A_51_P383629  | 1.6 | 4.5.E-02 | <i>Vps4a</i>    | NM_126165    |
| A_55_P1962429 | 1.6 | 4.4.E-02 | <i>Maf</i>      | AK151738     |
| A_55_P2102533 | 1.5 | 4.6.E-02 | <i>Fuca2</i>    | NM_025799    |
| A_55_P1988246 | 1.5 | 4.6.E-02 | N/A             | N/A          |
| A_65_P04284   | 1.5 | 4.9.E-02 | <i>Erap1</i>    | NM_030711    |
| A_55_P2022364 | 1.5 | 4.5.E-02 | <i>Nxn</i>      | NM_008750    |
| A_52_P556281  | 1.5 | 4.3.E-02 | <i>G3bp2</i>    | NM_001080795 |
| A_55_P2130575 | 1.5 | 4.6.E-02 | N/A             | N/A          |
| A_55_P2139181 | 1.5 | 4.7.E-02 | <i>Cald1</i>    | NM_145575    |

|               |     |          |                 |              |
|---------------|-----|----------|-----------------|--------------|
| A_55_P2023384 | 1.5 | 4.5.E-02 | N/A             | N/A          |
| A_55_P1982249 | 1.5 | 4.7.E-02 | <i>Phactr2</i>  | NM_001195065 |
| A_55_P2033650 | 1.5 | 4.6.E-02 | <i>Cpt2</i>     | NM_009949    |
| A_66_P125437  | 1.5 | 4.8.E-02 | <i>Rpl30</i>    | NM_009083    |
| A_55_P2040011 | 1.5 | 4.7.E-02 | <i>Itga7</i>    | NM_008398    |
| A_51_P517096  | 1.5 | 4.7.E-02 | <i>Casp8ap2</i> | NM_011997    |

## Downregulated entities

| Agilent probe ID | Fold change | p-value (Corr) | Gene Symbol         | Genbank Accession |
|------------------|-------------|----------------|---------------------|-------------------|
| A_55_P2111980    | 3295.7      | 2.8.E-06       | <i>Hsd3b5</i>       | NM_008295         |
| A_55_P2152607    | 242.8       | 2.0.E-05       | <i>Cyp4a12b</i>     | NM_172306         |
| A_55_P2011877    | 238.7       | 2.7.E-05       | <i>Eif2s3y</i>      | NM_012011         |
| A_55_P2004606    | 177.1       | 1.1.E-03       | <i>Serpina4-ps1</i> | NR_002861         |
| A_52_P2710       | 152.3       | 1.7.E-05       | <i>Cml5</i>         | NM_023493         |
| A_55_P1997003    | 151.7       | 1.7.E-03       | <i>Serpina4-ps1</i> | BC031891          |
| A_51_P402994     | 149.8       | 6.1.E-05       | <i>Ddx3y</i>        | NM_012008         |
| A_55_P2151956    | 123.2       | 2.3.E-05       | N/A                 | N/A               |
| A_52_P320193     | 111.0       | 2.5.E-03       | <i>Clec2h</i>       | NM_053165         |
| A_55_P2043083    | 99.9        | 1.2.E-04       | <i>Cyp4a12a</i>     | NM_177406         |
| A_55_P2032081    | 97.9        | 7.1.E-05       | <i>Dbp</i>          | NM_016974         |
| A_55_P2032079    | 52.1        | 3.3.E-04       | <i>Dbp</i>          | NM_016974         |
| A_55_P2041350    | 47.5        | 1.4.E-04       | <i>Cyp2d34</i>      | NM_145474         |
| A_55_P2078494    | 40.7        | 3.3.E-04       | <i>Cib3</i>         | NM_001080812      |
| A_52_P63343      | 39.8        | 1.6.E-03       | <i>Gm129</i>        | NM_001033302      |
| A_55_P1989658    | 35.8        | 2.2.E-05       | <i>Slco1a1</i>      | NM_013797         |
| A_55_P1954393    | 30.0        | 8.4.E-04       | <i>Susd4</i>        | NM_144796         |
| A_55_P2156219    | 27.1        | 1.5.E-03       | <i>Gm10549</i>      | AK141051          |
| A_55_P2111331    | 25.2        | 6.8.E-05       | <i>Klhl32</i>       | NM_001163020      |
| A_55_P2121886    | 23.9        | 1.1.E-03       | <i>Map3k9</i>       | NM_001174107      |
| A_55_P2093705    | 23.9        | 4.3.E-04       | <i>Meig1</i>        | NM_008579         |
| A_51_P342926     | 22.4        | 8.4.E-04       | <i>Omd</i>          | NM_012050         |
| A_52_P213889     | 21.2        | 8.9.E-03       | <i>Tmc7</i>         | NM_172476         |
| A_51_P456208     | 20.4        | 2.5.E-03       | <i>Tff3</i>         | NM_011575         |
| A_66_P128963     | 19.1        | 2.5.E-04       | <i>Cyp2d9</i>       | NM_010006         |
| A_55_P2136788    | 17.8        | 3.0.E-03       | N/A                 | N/A               |
| A_55_P2325038    | 17.4        | 6.1.E-03       | <i>Acsm2</i>        | NM_001177977      |
| A_55_P2008913    | 17.2        | 7.4.E-03       | <i>BC051665</i>     | NM_199148         |
| A_55_P2069679    | 16.9        | 2.0.E-04       | <i>Olfir746</i>     | NM_146298         |
| A_52_P566840     | 16.4        | 1.5.E-03       | <i>Gpr110</i>       | NM_133776         |
| A_55_P1971744    | 16.2        | 4.7.E-03       | <i>4921511M17Ri</i> | NM_001201358      |

|               |      |          |                      |              |
|---------------|------|----------|----------------------|--------------|
| A_55_P2135153 | 15.4 | 2.3.E-03 | <i>Lcn13</i>         | NM_153558    |
| A_55_P2116165 | 15.1 | 5.0.E-04 | <i>Pfkfb3</i>        | NM_001177753 |
| A_51_P391897  | 14.3 | 4.3.E-04 | <i>Olfr125</i>       | NM_146290    |
| A_55_P2122479 | 14.1 | 1.8.E-03 | N/A                  | DV656125     |
| A_55_P1999187 | 14.0 | 6.7.E-03 | <i>Cdk12</i>         | NM_026952    |
| A_55_P2153570 | 13.7 | 3.5.E-04 | <i>Zfp655</i>        | NM_001083958 |
| A_51_P188271  | 13.1 | 2.5.E-04 | <i>Cd248</i>         | NM_054042    |
| A_51_P218953  | 13.0 | 2.2.E-03 | <i>Zfp536</i>        | NM_172385    |
| A_52_P136914  | 12.9 | 2.2.E-03 | <i>Nudt7</i>         | NM_024437    |
| A_55_P2093704 | 12.2 | 5.5.E-03 | <i>Meig1</i>         | NM_008579    |
| A_55_P1985788 | 12.2 | 1.4.E-02 | <i>Usp2</i>          | NM_198092    |
| A_55_P1979753 | 11.9 | 1.4.E-03 | <i>6430411K18Rik</i> | NR_002848    |
| A_55_P2033947 | 11.7 | 2.5.E-03 | <i>Fnd3c2</i>        | NM_001033424 |
| A_52_P248013  | 11.4 | 1.9.E-02 | <i>Chsy3</i>         | NM_001081328 |
| A_55_P1959748 | 11.2 | 1.4.E-02 | <i>Asns</i>          | NM_012055    |
| A_52_P306357  | 11.2 | 1.7.E-02 | <i>Prok1</i>         | BC042707     |
| A_55_P2311855 | 11.1 | 2.2.E-03 | <i>Gm10509</i>       | EL606049     |
| A_55_P2086522 | 11.0 | 8.8.E-04 | <i>Gm6797</i>        | XM_003085249 |
| A_55_P2107070 | 10.8 | 2.4.E-03 | <i>Cabyr</i>         | NM_027687    |
| A_52_P347942  | 10.7 | 2.1.E-02 | <i>Olfr1384</i>      | NM_146472    |
| A_55_P1953103 | 10.7 | 4.2.E-03 | <i>Nudt7</i>         | NM_024446    |
| A_55_P2134725 | 10.7 | 1.9.E-03 | N/A                  | N/A          |
| A_51_P243418  | 10.7 | 1.6.E-02 | <i>Clec2g</i>        | NM_027562    |
| A_51_P449995  | 10.6 | 4.6.E-04 | <i>C6</i>            | NM_016704    |
| A_55_P1986341 | 10.5 | 8.0.E-04 | <i>Gm4956</i>        | NR_002858    |
| A_55_P2103033 | 10.5 | 7.7.E-03 | N/A                  | N/A          |
| A_55_P1994147 | 10.1 | 7.0.E-03 | <i>Zar1</i>          | NM_174877    |
| A_55_P2063654 | 10.0 | 3.8.E-03 | <i>Mup20</i>         | NM_001012323 |
| A_52_P238175  | 9.9  | 4.2.E-03 | <i>Odf3l1</i>        | NM_198673    |
| A_51_P510891  | 9.9  | 3.2.E-03 | <i>Afp</i>           | NM_007423    |
| A_55_P2169247 | 9.8  | 2.0.E-04 | <i>Gm15056</i>       | NM_001177471 |
| A_55_P1954116 | 9.6  | 7.3.E-03 | <i>C8b</i>           | NM_133882    |
| A_55_P2152225 | 9.6  | 2.0.E-02 | <i>Ihh</i>           | NM_010544    |
| A_52_P262930  | 9.5  | 9.5.E-04 | <i>2310081J21Rik</i> | AK036683     |
| A_66_P129763  | 9.5  | 1.3.E-02 | <i>Gm6329</i>        | AK144087     |
| A_55_P2356263 | 9.4  | 1.7.E-02 | <i>Anks1b</i>        | AK036288     |
| A_55_P2143683 | 9.3  | 1.7.E-03 | <i>Gm9927</i>        | AK034060     |
| A_55_P2158663 | 9.3  | 9.1.E-03 | <i>Cldn7</i>         | N/A          |
| A_51_P327451  | 9.2  | 2.8.E-04 | <i>Alas2</i>         | NM_009653    |
| A_55_P2007646 | 9.2  | 8.0.E-03 | <i>Cryaa</i>         | NM_013501    |
| A_52_P278497  | 9.1  | 4.7.E-03 | <i>Eif4ebp3</i>      | NM_201256    |

|               |     |          |                     |              |
|---------------|-----|----------|---------------------|--------------|
| A_55_P2391185 | 9.0 | 8.4.E-04 | <i>AI195381</i>     | DV044254     |
| A_55_P2064333 | 9.0 | 9.4.E-03 | <i>Lama3</i>        | NM_010680    |
| A_55_P2092219 | 9.0 | 7.7.E-03 | <i>Serpina9</i>     | NM_027997    |
| A_55_P2125791 | 8.9 | 1.0.E-03 | <i>Gm15535</i>      | XR_104840    |
| A_55_P2178327 | 8.8 | 3.6.E-03 | <i>Tll1</i>         | NM_009390    |
| A_55_P2091413 | 8.8 | 8.9.E-03 | <i>N/A</i>          | XM_978485    |
| A_55_P2207186 | 8.7 | 6.3.E-03 | <i>Slc30a7</i>      | NM_023214    |
| A_51_P324633  | 8.6 | 1.3.E-02 | <i>Elovl3</i>       | NM_007703    |
| A_55_P1952935 | 8.6 | 1.2.E-02 | <i>Olf151</i>       | NM_207664    |
| A_66_P122621  | 8.6 | 4.7.E-03 | <i>Gm9889</i>       | AK038322     |
| A_51_P228159  | 8.4 | 1.0.E-02 | <i>4930430O22Ri</i> | XM_003085348 |
| A_55_P2122300 | 8.4 | 8.0.E-03 | <i>Cir1</i>         | NM_025854    |
| A_55_P2051476 | 8.4 | 4.7.E-03 | <i>C8a</i>          | NM_146148    |
| A_55_P2019989 | 8.3 | 9.0.E-04 | <i>N/A</i>          | N/A          |
| A_55_P2031668 | 8.3 | 8.4.E-04 | <i>Gstp1</i>        | NM_013541    |
| A_55_P2085955 | 8.3 | 1.1.E-03 | <i>Dnajb11</i>      | NM_026400    |
| A_55_P2018666 | 8.3 | 4.0.E-03 | <i>Thrsp</i>        | NM_009381    |
| A_55_P2008704 | 8.2 | 5.3.E-04 | <i>Gstp2</i>        | NM_181796    |
| A_51_P461429  | 8.1 | 3.3.E-03 | <i>Cyp7b1</i>       | NM_007825    |
| A_55_P2023114 | 8.0 | 8.4.E-04 | <i>Hsd3b2</i>       | NM_153193    |
| A_55_P1975682 | 8.0 | 5.5.E-03 | <i>Rhox2e</i>       | NM_001085348 |
| A_55_P1994733 | 7.9 | 6.2.E-03 | <i>Tmem14a</i>      | AK017734     |
| A_55_P2106068 | 7.9 | 7.7.E-03 | <i>Myh2</i>         | NM_001039545 |
| A_55_P2058962 | 7.7 | 1.5.E-03 | <i>Mcm10</i>        | NM_027290    |
| A_55_P2027708 | 7.7 | 4.7.E-03 | <i>5830416P10Ri</i> | NR_028427    |
| A_55_P1956862 | 7.7 | 5.7.E-03 | <i>Egfr</i>         | NM_007912    |
| A_66_P126877  | 7.7 | 8.7.E-03 | <i>Vmn1r214</i>     | NM_134214    |
| A_52_P340669  | 7.6 | 4.2.E-03 | <i>Bhlha15</i>      | NM_010800    |
| A_55_P2132921 | 7.6 | 7.8.E-03 | <i>N/A</i>          | N/A          |
| A_55_P2057430 | 7.6 | 6.1.E-03 | <i>Lipn</i>         | NM_027340    |
| A_55_P2123012 | 7.5 | 2.2.E-02 | <i>AA667203</i>     | XM_003085206 |
| A_52_P653825  | 7.5 | 9.2.E-03 | <i>Keg1</i>         | NM_029550    |
| A_55_P1966635 | 7.5 | 3.8.E-03 | <i>Vmn2r75</i>      | NM_001102578 |
| A_51_P228971  | 7.5 | 4.7.E-03 | <i>Slc5a4b</i>      | NM_023219    |
| A_55_P2033326 | 7.5 | 4.2.E-03 | <i>N/A</i>          | AW012817     |
| A_55_P2111267 | 7.5 | 8.8.E-03 | <i>Lhx9</i>         | NM_001042577 |
| A_55_P2025343 | 7.5 | 1.0.E-02 | <i>Mup21</i>        | NM_001009550 |
| A_55_P1955871 | 7.4 | 1.7.E-02 | <i>Nlrp4f</i>       | NM_175290    |
| A_55_P1981197 | 7.4 | 7.9.E-03 | <i>N/A</i>          | BI247616     |
| A_52_P259817  | 7.4 | 1.2.E-02 | <i>Upp2</i>         | NM_029692    |
| A_55_P2018594 | 7.4 | 8.9.E-03 | <i>N/A</i>          | XM_888852    |

|               |     |          |                      |              |
|---------------|-----|----------|----------------------|--------------|
| A_55_P2083474 | 7.4 | 3.0.E-02 | <i>Lpin1</i>         | NM_001130412 |
| A_51_P343474  | 7.4 | 8.6.E-03 | <i>Krt2</i>          | NM_010668    |
| A_55_P2075127 | 7.3 | 2.4.E-02 | <i>Pax2</i>          | NM_011037    |
| A_55_P2013793 | 7.2 | 1.2.E-03 | N/A                  | CF911099     |
| A_55_P1973447 | 7.1 | 1.1.E-02 | <i>Ybx2</i>          | N/A          |
| A_55_P2069760 | 7.1 | 1.1.E-02 | <i>Sprr2b</i>        | NM_011469    |
| A_52_P562612  | 7.0 | 2.3.E-03 | <i>Srd5a1</i>        | AK082819     |
| A_51_P151246  | 7.0 | 1.0.E-02 | <i>Olfir924</i>      | NM_207560    |
| A_55_P2228122 | 7.0 | 4.3.E-03 | <i>BC024137</i>      | BC024137     |
| A_51_P479230  | 6.9 | 6.9.E-04 | <i>Nat8</i>          | NM_023455    |
| A_52_P514352  | 6.9 | 1.5.E-03 | <i>Kcnk5</i>         | NM_021542    |
| A_66_P122730  | 6.9 | 8.0.E-03 | N/A                  | AK138367     |
| A_55_P2106241 | 6.9 | 1.8.E-03 | <i>4930432K21Rik</i> | NM_029045    |
| A_52_P329398  | 6.9 | 1.0.E-02 | <i>Atp12a</i>        | NM_138652    |
| A_55_P2100281 | 6.8 | 5.0.E-03 | <i>Defb30</i>        | DQ141309     |
| A_55_P2167269 | 6.7 | 1.5.E-02 | <i>Pcsk4</i>         | NM_008793    |
| A_55_P1969665 | 6.7 | 1.9.E-03 | <i>Hsd3b4</i>        | NM_001111336 |
| A_52_P253567  | 6.7 | 2.0.E-03 | <i>Hsd3b6</i>        | NM_013821    |
| A_51_P137336  | 6.7 | 4.1.E-03 | <i>Cdh1</i>          | NM_009864    |
| A_51_P184681  | 6.6 | 5.0.E-03 | <i>Olfir675</i>      | NM_001011848 |
| A_51_P374464  | 6.6 | 9.5.E-04 | <i>Gstp1</i>         | NM_013541    |
| A_55_P2221236 | 6.6 | 1.1.E-02 | <i>AU024180</i>      | AK085976     |
| A_66_P109802  | 6.5 | 8.3.E-03 | <i>Ces3b</i>         | NM_001159415 |
| A_66_P136186  | 6.5 | 1.6.E-02 | <i>Wee1</i>          | NM_009516    |
| A_55_P1958798 | 6.5 | 1.7.E-03 | <i>Mobp</i>          | NM_008614    |
| A_55_P1997345 | 6.5 | 2.5.E-03 | <i>Gm11568</i>       | NM_001205030 |
| A_55_P2082225 | 6.5 | 6.0.E-03 | N/A                  | N/A          |
| A_55_P2201866 | 6.3 | 1.5.E-03 | <i>2310047N11Rik</i> | AK019096     |
| A_55_P2186302 | 6.3 | 2.2.E-03 | <i>Gm9866</i>        | XR_035276    |
| A_55_P2097773 | 6.2 | 1.1.E-02 | <i>Msh4</i>          | NM_031870    |
| A_55_P2051159 | 6.2 | 1.7.E-02 | <i>Upp2</i>          | NM_029692    |
| A_51_P409637  | 6.2 | 2.1.E-03 | <i>4930505A04Rik</i> | NM_001100394 |
| A_51_P516119  | 6.2 | 8.4.E-04 | <i>Olfir1148</i>     | NM_001011519 |
| A_55_P2094108 | 6.1 | 9.2.E-03 | N/A                  | N/A          |
| A_66_P130650  | 6.1 | 1.3.E-02 | <i>Gm9979</i>        | XM_003085861 |
| A_55_P2095513 | 6.1 | 8.4.E-04 | <i>Try5</i>          | NM_001003405 |
| A_51_P189733  | 6.1 | 8.7.E-03 | <i>2810007J24Rik</i> | NM_175250    |
| A_66_P108059  | 6.1 | 1.2.E-03 | <i>Ttc39c</i>        | NM_028341    |
| A_55_P2167171 | 6.1 | 6.1.E-03 | N/A                  | N/A          |
| A_55_P2007816 | 6.0 | 2.4.E-02 | <i>Mup4</i>          | NM_008648    |
| A_55_P2083186 | 6.0 | 3.8.E-03 | <i>LOC100009614</i>  | NM_001081452 |

|               |     |          |                     |              |
|---------------|-----|----------|---------------------|--------------|
| A_55_P2055834 | 6.0 | 6.7.E-03 | N/A                 | AK090145     |
| A_55_P2177371 | 6.0 | 5.8.E-03 | <i>Gm3086</i>       | NR_036607    |
| A_55_P2141801 | 5.9 | 8.9.E-03 | N/A                 | N/A          |
| A_55_P1981195 | 5.9 | 1.9.E-02 | N/A                 | N/A          |
| A_51_P223776  | 5.9 | 1.7.E-03 | <i>Nr1d1</i>        | NM_145434    |
| A_66_P132787  | 5.9 | 7.9.E-03 | N/A                 | M11859       |
| A_55_P2156780 | 5.9 | 4.7.E-03 | N/A                 | CJ236021     |
| A_55_P2013470 | 5.9 | 4.3.E-03 | <i>Gm14743</i>      | NM_001126321 |
| A_55_P1971139 | 5.9 | 3.5.E-03 | <i>Fbll1</i>        | NM_001004147 |
| A_55_P1956863 | 5.9 | 5.4.E-03 | <i>Egfr</i>         | NM_007912    |
| A_51_P420415  | 5.8 | 3.3.E-03 | <i>Srd5a1</i>       | NM_175283    |
| A_55_P2086730 | 5.8 | 1.3.E-02 | <i>Olf910</i>       | NM_146811    |
| A_51_P443819  | 5.8 | 1.8.E-03 | <i>2610034M16Ri</i> | NM_027001    |
| A_55_P1989738 | 5.7 | 3.0.E-02 | <i>4930426L09Ri</i> | NR_024323    |
| A_51_P335480  | 5.6 | 5.6.E-03 | <i>1810055G02Ri</i> | NM_028077    |
| A_55_P1987117 | 5.5 | 8.0.E-03 | <i>Slc22a16</i>     | NM_027572    |
| A_55_P2128511 | 5.5 | 2.1.E-03 | <i>Ociad2</i>       | NM_026950    |
| A_55_P2083307 | 5.5 | 1.1.E-02 | <i>Capn8</i>        | NM_130890    |
| A_52_P529660  | 5.5 | 5.0.E-03 | <i>Lrrc52</i>       | NM_001013382 |
| A_55_P2005501 | 5.4 | 4.5.E-03 | <i>Olf392</i>       | NM_147006    |
| A_51_P467668  | 5.4 | 5.5.E-03 | <i>Ick</i>          | NM_019987    |
| A_55_P2022778 | 5.4 | 5.7.E-03 | <i>Trpc2</i>        | NM_011644    |
| A_55_P2023988 | 5.4 | 1.5.E-02 | <i>Gm8008</i>       | XM_001477516 |
| A_55_P2026360 | 5.4 | 1.1.E-02 | <i>Fbxw20</i>       | NM_001008428 |
| A_55_P2116674 | 5.4 | 2.8.E-02 | N/A                 | N/A          |
| A_55_P2046671 | 5.4 | 2.6.E-02 | N/A                 | N/A          |
| A_55_P2335723 | 5.4 | 6.8.E-03 | <i>2900009J06Ri</i> | AA986756     |
| A_55_P2032423 | 5.4 | 3.3.E-03 | N/A                 | N/A          |
| A_52_P275069  | 5.4 | 4.0.E-03 | <i>Gm6792</i>       | NM_001177416 |
| A_55_P2092501 | 5.3 | 1.5.E-02 | <i>Med1</i>         | NM_134027    |
| A_52_P150988  | 5.3 | 4.3.E-03 | <i>Txndc11</i>      | NM_029582    |
| A_52_P213807  | 5.3 | 2.6.E-02 | <i>Olf228</i>       | NM_146405    |
| A_51_P211351  | 5.3 | 1.5.E-02 | <i>Olf677</i>       | NM_146358    |
| A_55_P1958227 | 5.3 | 4.2.E-03 | N/A                 | AK135304     |
| A_51_P130727  | 5.3 | 1.8.E-03 | <i>Fkbp11</i>       | NM_024169    |
| A_55_P2012439 | 5.3 | 1.6.E-03 | <i>Tnfrsf19</i>     | NM_013869    |
| A_66_P108979  | 5.2 | 1.4.E-02 | <i>Olf1535</i>      | NM_207572    |
| A_55_P2344593 | 5.2 | 6.5.E-03 | N/A                 | AK016119     |
| A_55_P2061104 | 5.2 | 1.7.E-02 | <i>Mup6</i>         | NM_001081285 |
| A_55_P1979893 | 5.2 | 4.7.E-03 | <i>Tef</i>          | NM_017376    |
| A_55_P2128113 | 5.1 | 4.3.E-03 | <i>Tbc1d12</i>      | NM_145952    |

|               |     |          |                      |              |
|---------------|-----|----------|----------------------|--------------|
| A_52_P669682  | 5.1 | 3.0.E-02 | <i>Gm7225</i>        | XM_003086063 |
| A_55_P2058761 | 5.1 | 8.2.E-03 | <i>G6pc2</i>         | NM_021331    |
| A_51_P282760  | 5.0 | 4.3.E-03 | <i>Per2</i>          | NM_011066    |
| A_55_P2187076 | 5.0 | 8.0.E-03 | <i>Sncg</i>          | NM_011430    |
| A_55_P2129309 | 5.0 | 6.1.E-03 | <i>Foxo3</i>         | AK143198     |
| A_52_P402127  | 5.0 | 3.3.E-02 | <i>Mup9</i>          | NM_001126319 |
| A_66_P138178  | 5.0 | 1.4.E-02 | <i>Gm4107</i>        | AK041437     |
| A_52_P628212  | 5.0 | 2.0.E-02 | <i>Esrrb</i>         | AK044339     |
| A_51_P204247  | 5.0 | 7.2.E-03 | <i>C8a</i>           | NM_146148    |
| A_51_P287198  | 4.8 | 9.3.E-03 | <i>Krt23</i>         | NM_033373    |
| A_51_P256093  | 4.8 | 1.8.E-02 | <i>Map2k6</i>        | NM_011943    |
| A_55_P2058220 | 4.8 | 5.6.E-03 | <i>Prlhr</i>         | NM_201615    |
| A_51_P517145  | 4.8 | 1.2.E-02 | <i>Sort1</i>         | NM_019972    |
| A_55_P2044847 | 4.8 | 2.5.E-02 | <i>Nhlrc1</i>        | NM_175340    |
| A_51_P208987  | 4.7 | 1.5.E-02 | <i>Pgm3</i>          | NM_028352    |
| A_52_P106259  | 4.7 | 1.7.E-02 | <i>Egfr</i>          | NM_207655    |
| A_66_P120732  | 4.7 | 1.8.E-03 | <i>Gpr45</i>         | NM_053107    |
| A_55_P2051044 | 4.7 | 7.4.E-03 | <i>N/A</i>           | N/A          |
| A_51_P514405  | 4.7 | 1.6.E-02 | <i>Slc2a5</i>        | NM_019741    |
| A_66_P106421  | 4.7 | 9.8.E-03 | <i>Ccdc30</i>        | NM_029286    |
| A_52_P536494  | 4.6 | 2.1.E-02 | <i>Mycn</i>          | NM_008709    |
| A_55_P2234889 | 4.6 | 5.5.E-03 | <i>C78704</i>        | CA882486     |
| A_55_P2070938 | 4.6 | 5.8.E-03 | <i>N/A</i>           | N/A          |
| A_55_P2000543 | 4.6 | 5.4.E-03 | <i>Cd209f</i>        | NM_026956    |
| A_55_P1958804 | 4.6 | 4.2.E-03 | <i>Hsd3b3</i>        | NM_001161742 |
| A_51_P122855  | 4.6 | 2.1.E-03 | <i>Pax5</i>          | NM_008782    |
| A_55_P2154200 | 4.6 | 4.6.E-03 | <i>Olfir612</i>      | NM_001200027 |
| A_51_P408946  | 4.6 | 3.9.E-03 | <i>Ccne1</i>         | NM_007633    |
| A_51_P261164  | 4.6 | 1.5.E-02 | <i>F2rl2</i>         | NM_010170    |
| A_55_P2099947 | 4.6 | 8.5.E-03 | <i>Gdf1</i>          | NM_001163282 |
| A_55_P2068125 | 4.6 | 6.0.E-03 | <i>Myct1</i>         | NM_026793    |
| A_51_P311904  | 4.6 | 1.7.E-03 | <i>Ptk2b</i>         | NM_172498    |
| A_51_P245503  | 4.6 | 4.1.E-03 | <i>Ugt2b1</i>        | NM_152811    |
| A_55_P2132800 | 4.5 | 1.2.E-02 | <i>Zfp367</i>        | AK041361     |
| A_55_P2006930 | 4.5 | 9.7.E-03 | <i>2610005L07Rik</i> | BC025151     |
| A_55_P2065671 | 4.5 | 1.1.E-02 | <i>Ccnb1</i>         | NM_172301    |
| A_55_P2033272 | 4.5 | 5.3.E-03 | <i>Treh</i>          | NM_021481    |
| A_55_P2230154 | 4.5 | 6.1.E-03 | <i>A730046J19Rik</i> | NR_040271    |
| A_55_P1996344 | 4.5 | 2.9.E-02 | <i>N/A</i>           | N/A          |
| A_55_P2118604 | 4.5 | 1.6.E-02 | <i>St6galnac1</i>    | NM_011371    |
| A_51_P500661  | 4.4 | 2.6.E-03 | <i>Rnf182</i>        | NM_183204    |

|               |     |          |                      |              |
|---------------|-----|----------|----------------------|--------------|
| A_52_P159490  | 4.4 | 1.0.E-02 | <i>Ppp1r9a</i>       | NM_181595    |
| A_66_P112495  | 4.4 | 7.3.E-03 | <i>Scn4b</i>         | NM_001013390 |
| A_55_P2122896 | 4.4 | 4.9.E-03 | <i>N/A</i>           | N/A          |
| A_55_P2019520 | 4.4 | 4.0.E-03 | <i>Cma2</i>          | NM_001024714 |
| A_52_P303891  | 4.4 | 1.9.E-03 | <i>Nr1d2</i>         | NM_011584    |
| A_52_P193236  | 4.4 | 4.7.E-03 | <i>1600002H07Rik</i> | NM_028056    |
| A_55_P1961458 | 4.4 | 3.3.E-02 | <i>Speer1-ps1</i>    | NR_001586    |
| A_55_P2159717 | 4.4 | 7.4.E-03 | <i>Gm5591</i>        | NM_001013810 |
| A_52_P604629  | 4.4 | 5.1.E-03 | <i>Csrnp1</i>        | NM_153287    |
| A_55_P2012779 | 4.4 | 7.9.E-03 | <i>Rnf167</i>        | NM_027445    |
| A_55_P2147276 | 4.4 | 4.1.E-03 | <i>Orai1</i>         | NM_175423    |
| A_52_P217240  | 4.4 | 3.3.E-03 | <i>Ppme1</i>         | NM_028292    |
| A_55_P2053704 | 4.4 | 2.0.E-02 | <i>Pglyrp4</i>       | NM_001165968 |
| A_55_P2256393 | 4.4 | 3.2.E-03 | <i>1700030L22Rik</i> | BU961976     |
| A_55_P2143851 | 4.4 | 1.1.E-02 | <i>Gm996</i>         | NM_001005424 |
| A_66_P120125  | 4.3 | 3.0.E-02 | <i>DOH4S114</i>      | NM_053078    |
| A_55_P2036547 | 4.3 | 2.3.E-03 | <i>Hsd3b2</i>        | NM_153193    |
| A_55_P2369400 | 4.3 | 1.0.E-02 | <i>1700066O22Rik</i> | NR_015541    |
| A_55_P2122653 | 4.3 | 8.6.E-03 | <i>Dnahc3</i>        | BC051401     |
| A_55_P2054342 | 4.3 | 4.5.E-03 | <i>2810408I11Rik</i> | NR_038009    |
| A_55_P2156727 | 4.3 | 1.3.E-02 | <i>Gm16509</i>       | XM_001473385 |
| A_55_P2141008 | 4.3 | 1.8.E-02 | <i>Siglech</i>       | AK080658     |
| A_55_P2007703 | 4.3 | 1.7.E-03 | <i>Nanogpd</i>       | NM_001080945 |
| A_55_P2009988 | 4.3 | 2.3.E-03 | <i>Trib3</i>         | NM_175093    |
| A_55_P2110542 | 4.2 | 3.3.E-02 | <i>N/A</i>           | N/A          |
| A_51_P353524  | 4.2 | 8.0.E-03 | <i>4930568D16Rik</i> | NM_029463    |
| A_55_P2024634 | 4.2 | 1.0.E-02 | <i>N/A</i>           | XR_104688    |
| A_55_P2145977 | 4.2 | 5.0.E-03 | <i>Fbxw15</i>        | NM_199036    |
| A_52_P315369  | 4.2 | 1.9.E-02 | <i>Cyb5r1</i>        | NM_028057    |
| A_51_P417876  | 4.2 | 6.4.E-03 | <i>Smyd5</i>         | NM_144918    |
| A_52_P59711   | 4.2 | 1.7.E-02 | <i>Fhl4</i>          | NM_010214    |
| A_55_P2425801 | 4.2 | 9.1.E-03 | <i>Fmn1</i>          | NM_010230    |
| A_66_P125741  | 4.2 | 2.5.E-03 | <i>Ripply2</i>       | NM_001037907 |
| A_55_P2157537 | 4.2 | 3.2.E-02 | <i>Gm10866</i>       | XM_003085086 |
| A_55_P2061219 | 4.2 | 1.1.E-02 | <i>Ces3a</i>         | NM_198672    |
| A_66_P101561  | 4.2 | 1.5.E-02 | <i>Gm2176</i>        | NR_028424    |
| A_51_P486217  | 4.2 | 1.5.E-02 | <i>Wnk4</i>          | NM_175638    |
| A_55_P2142222 | 4.2 | 1.2.E-02 | <i>Serpina3h</i>     | NR_033450    |
| A_51_P229664  | 4.2 | 2.5.E-03 | <i>Cd27</i>          | NM_001033126 |
| A_51_P429366  | 4.2 | 4.1.E-03 | <i>Hes6</i>          | NM_019479    |
| A_55_P1952156 | 4.1 | 1.7.E-02 | <i>N/A</i>           | N/A          |



|               |     |          |                      |              |
|---------------|-----|----------|----------------------|--------------|
| A_55_P2000007 | 4.1 | 1.3.E-02 | N/A                  | N/A          |
| A_51_P491667  | 4.1 | 1.2.E-02 | <i>Derl3</i>         | NM_024440    |
| A_55_P2013710 | 4.1 | 1.0.E-02 | <i>Apoc3</i>         | N/A          |
| A_55_P2033020 | 4.1 | 3.8.E-02 | <i>Clcn1</i>         | NM_013491    |
| A_55_P2070366 | 4.1 | 4.4.E-03 | <i>Nlrp1a</i>        | AY355339     |
| A_55_P2364755 | 4.0 | 1.1.E-02 | N/A                  | XM_003086948 |
| A_51_P401501  | 4.0 | 1.2.E-02 | <i>Tmem213</i>       | NM_029921    |
| A_51_P189746  | 4.0 | 1.1.E-02 | <i>Pim3</i>          | NM_145478    |
| A_51_P330144  | 4.0 | 4.3.E-03 | <i>Ift140</i>        | NM_134126    |
| A_66_P112260  | 4.0 | 7.3.E-03 | <i>Gm10688</i>       | XM_003084786 |
| A_51_P355829  | 4.0 | 1.0.E-02 | <i>Ifna4</i>         | NM_010504    |
| A_55_P2246665 | 4.0 | 3.5.E-02 | <i>4833422M21Ri</i>  | AK014752     |
| A_55_P2150328 | 4.0 | 9.1.E-03 | N/A                  | N/A          |
| A_52_P345539  | 4.0 | 8.9.E-03 | <i>Uty</i>           | NM_009484    |
| A_52_P11402   | 4.0 | 1.6.E-02 | <i>Lrrc24</i>        | NM_198119    |
| A_52_P362917  | 4.0 | 6.1.E-03 | <i>Pfkfb3</i>        | NM_133232    |
| A_55_P2014021 | 4.0 | 1.2.E-02 | N/A                  | N/A          |
| A_55_P2018377 | 4.0 | 2.5.E-03 | N/A                  | N/A          |
| A_66_P127161  | 4.0 | 5.9.E-03 | <i>Cyp2u1</i>        | NM_027816    |
| A_51_P224593  | 4.0 | 3.6.E-03 | <i>Arl8a</i>         | NM_026823    |
| A_55_P2173288 | 4.0 | 1.1.E-02 | <i>Pcdhb1</i>        | NM_053126    |
| A_55_P2422074 | 4.0 | 1.9.E-03 | <i>BC025933</i>      | BC025933     |
| A_55_P2126269 | 3.9 | 9.5.E-03 | <i>Nmb</i>           | NM_026523    |
| A_51_P225723  | 3.9 | 3.8.E-03 | <i>Olfir908</i>      | NM_146872    |
| A_55_P1960793 | 3.9 | 5.6.E-03 | N/A                  | N/A          |
| A_55_P2000289 | 3.9 | 7.3.E-03 | <i>Mab21l2</i>       | NM_011839    |
| A_55_P2116794 | 3.9 | 1.0.E-02 | N/A                  | N/A          |
| A_55_P1973926 | 3.9 | 9.6.E-03 | <i>Ipo13</i>         | NM_146152    |
| A_55_P2045859 | 3.9 | 9.6.E-03 | N/A                  | N/A          |
| A_55_P2208463 | 3.9 | 8.3.E-03 | <i>6820426E19Rik</i> | XR_105017    |
| A_51_P305532  | 3.9 | 1.7.E-03 | <i>Eif2s3x</i>       | NM_012010    |
| A_52_P204618  | 3.9 | 1.1.E-02 | <i>Rnf222</i>        | NM_177060    |
| A_51_P250571  | 3.9 | 2.4.E-02 | <i>Tas2r140</i>      | NM_021562    |
| A_55_P2104587 | 3.9 | 1.4.E-02 | N/A                  | N/A          |
| A_66_P103260  | 3.9 | 4.5.E-03 | <i>Gm15234</i>       | AK039813     |
| A_55_P2406079 | 3.8 | 6.8.E-03 | <i>AU024546</i>      | AU024546     |
| A_55_P2041668 | 3.8 | 1.1.E-02 | <i>Foxl2</i>         | NM_012020    |
| A_55_P2179271 | 3.8 | 7.7.E-03 | <i>Ccdc30</i>        | NM_029286    |
| A_51_P167843  | 3.8 | 4.7.E-03 | <i>Timm17a</i>       | NM_011590    |
| A_55_P2026385 | 3.8 | 8.9.E-03 | N/A                  | N/A          |
| A_55_P2059732 | 3.8 | 9.1.E-03 | N/A                  | N/A          |

|               |     |          |                      |              |
|---------------|-----|----------|----------------------|--------------|
| A_52_P319093  | 3.8 | 1.9.E-02 | <i>Serpina3k</i>     | NM_011458    |
| A_55_P2089840 | 3.8 | 1.1.E-02 | <i>Eif2d</i>         | NM_001136070 |
| A_55_P2082454 | 3.8 | 4.9.E-03 | N/A                  | N/A          |
| A_55_P1972001 | 3.8 | 8.7.E-03 | <i>LOC100039183</i>  | XM_003086064 |
| A_55_P2085518 | 3.8 | 1.6.E-02 | N/A                  | N/A          |
| A_55_P2244355 | 3.8 | 5.8.E-03 | <i>2410024N13Ril</i> | AK010586     |
| A_51_P392429  | 3.7 | 7.5.E-03 | <i>Mrgpre</i>        | NM_175534    |
| A_51_P450505  | 3.7 | 1.6.E-02 | <i>Olfir835</i>      | NM_001012266 |
| A_51_P185763  | 3.7 | 9.6.E-03 | <i>Slc46a2</i>       | NM_021053    |
| A_55_P2033381 | 3.7 | 1.9.E-02 | <i>1810041L15Ril</i> | NM_001163145 |
| A_66_P134539  | 3.7 | 3.9.E-03 | <i>A430110L20Ril</i> | XM_003084469 |
| A_55_P2130438 | 3.7 | 4.0.E-03 | <i>6530409C15Ril</i> | XM_987873    |
| A_55_P2064741 | 3.7 | 1.1.E-02 | <i>Nmb</i>           | NM_026523    |
| A_55_P2188237 | 3.7 | 5.5.E-03 | <i>C530008M17Ril</i> | AK013453     |
| A_55_P2130792 | 3.7 | 7.9.E-03 | <i>Tuft1</i>         | NM_011656    |
| A_55_P2182467 | 3.7 | 3.9.E-03 | <i>Slamf6</i>        | NM_030710    |
| A_52_P18765   | 3.7 | 1.1.E-02 | <i>Hsbp111</i>       | NM_001136181 |
| A_55_P2036585 | 3.6 | 2.7.E-02 | <i>Gm13547</i>       | AK133213     |
| A_55_P2134967 | 3.6 | 3.6.E-03 | <i>Uty</i>           | NM_009484    |
| A_55_P2037930 | 3.6 | 5.3.E-03 | N/A                  | N/A          |
| A_66_P112593  | 3.6 | 6.2.E-03 | <i>Sec61b</i>        | NM_024171    |
| A_51_P109258  | 3.6 | 2.5.E-02 | <i>Cys1</i>          | NM_138686    |
| A_55_P2032868 | 3.6 | 3.1.E-02 | <i>4932412H11Ril</i> | NM_172879    |
| A_55_P2041082 | 3.6 | 4.3.E-03 | N/A                  | N/A          |
| A_55_P2040305 | 3.6 | 4.7.E-03 | N/A                  | N/A          |
| A_55_P1976934 | 3.5 | 3.1.E-03 | <i>Unc13d</i>        | BC046519     |
| A_55_P1961408 | 3.5 | 2.1.E-02 | <i>Gm15308</i>       | NM_001177521 |
| A_52_P676255  | 3.5 | 6.1.E-03 | <i>Itpril1</i>       | NM_001163527 |
| A_55_P2103703 | 3.5 | 2.0.E-02 | <i>Mup-ps21</i>      | XM_621624    |
| A_55_P2067669 | 3.5 | 6.2.E-03 | <i>Adam28</i>        | AK081736     |
| A_55_P2131048 | 3.5 | 9.7.E-03 | N/A                  | N/A          |
| A_55_P1989149 | 3.5 | 4.2.E-02 | <i>Olfir394</i>      | NM_147007    |
| A_55_P2014249 | 3.5 | 3.3.E-02 | <i>Sema3a</i>        | NM_009152    |
| A_55_P2109407 | 3.5 | 6.8.E-03 | <i>Rnase12</i>       | NM_001011875 |
| A_55_P2148534 | 3.5 | 2.2.E-03 | <i>Nr1d2</i>         | BC096461     |
| A_52_P278354  | 3.5 | 5.5.E-03 | <i>Bmp7</i>          | NM_007557    |
| A_55_P2055112 | 3.5 | 7.9.E-03 | <i>Prss44</i>        | AB047758     |
| A_55_P2030076 | 3.5 | 6.7.E-03 | <i>Ifnab</i>         | NM_008336    |
| A_52_P109232  | 3.5 | 2.8.E-02 | N/A                  | N/A          |
| A_55_P1971124 | 3.5 | 6.2.E-03 | <i>Mbd1</i>          | NM_013594    |
| A_55_P2378030 | 3.5 | 7.0.E-03 | <i>4933439N14Ril</i> | AK019859     |

|               |     |          |                      |              |
|---------------|-----|----------|----------------------|--------------|
| A_55_P2307496 | 3.5 | 7.0.E-03 | <i>LOC620306</i>     | AK041010     |
| A_52_P99807   | 3.5 | 7.1.E-03 | <i>Dpy19l3</i>       | NM_178704    |
| A_51_P288010  | 3.5 | 7.7.E-03 | <i>Chrng</i>         | NM_009604    |
| A_55_P2038882 | 3.5 | 4.7.E-03 | <i>Niacr1</i>        | NM_030701    |
| A_55_P2181176 | 3.5 | 4.7.E-03 | <i>Nipal3</i>        | NM_028995    |
| A_55_P2302195 | 3.5 | 5.1.E-03 | <i>0610040F04Rik</i> | AK039720     |
| A_55_P2124712 | 3.4 | 8.0.E-03 | <i>Ces2c</i>         | NM_145603    |
| A_52_P627269  | 3.4 | 7.9.E-03 | <i>Ces2b</i>         | NM_198171    |
| A_55_P2125557 | 3.4 | 4.2.E-02 | <i>Irx2</i>          | NM_010574    |
| A_51_P221823  | 3.4 | 8.7.E-03 | <i>Krtap16-7</i>     | NM_028621    |
| A_55_P2180347 | 3.4 | 2.5.E-03 | <i>N/A</i>           | N/A          |
| A_51_P214663  | 3.4 | 4.1.E-03 | <i>Tpmt</i>          | NM_016785    |
| A_52_P395242  | 3.4 | 1.6.E-02 | <i>Map2k6</i>        | AK086722     |
| A_55_P1971237 | 3.4 | 1.6.E-02 | <i>Mup3</i>          | NM_001039544 |
| A_55_P2059864 | 3.4 | 1.5.E-02 | <i>Igsf1</i>         | NM_177591    |
| A_55_P2275249 | 3.4 | 8.8.E-03 | <i>Th</i>            | NM_009377    |
| A_55_P2058606 | 3.4 | 2.0.E-02 | <i>C130079G13Ri</i>  | NM_177661    |
| A_66_P135403  | 3.4 | 7.3.E-03 | <i>AI481877</i>      | AK135748     |
| A_55_P2073094 | 3.4 | 1.5.E-02 | <i>Trex2</i>         | NM_011907    |
| A_55_P1952394 | 3.4 | 7.7.E-03 | <i>Cphx</i>          | NM_175342    |
| A_55_P2076749 | 3.4 | 2.4.E-02 | <i>Cad</i>           | NM_023525    |
| A_55_P2001628 | 3.4 | 9.2.E-03 | <i>Rps4y2</i>        | NR_003634    |
| A_51_P444954  | 3.4 | 2.0.E-02 | <i>Serpina5</i>      | NM_172953    |
| A_52_P520341  | 3.4 | 7.8.E-03 | <i>N/A</i>           | AK088084     |
| A_66_P104751  | 3.3 | 2.2.E-02 | <i>2210404J11Rik</i> | AK019108     |
| A_66_P129145  | 3.3 | 3.1.E-02 | <i>1700012O15Ri</i>  | AK005929     |
| A_55_P2142789 | 3.3 | 9.9.E-03 | <i>AI463229</i>      | XR_105529    |
| A_55_P2089488 | 3.3 | 8.7.E-03 | <i>Coq10b</i>        | NM_001039710 |
| A_55_P2154809 | 3.3 | 1.0.E-02 | <i>Morn3</i>         | NM_029112    |
| A_52_P318361  | 3.3 | 7.2.E-03 | <i>Ces2c</i>         | NM_145603    |
| A_55_P2152240 | 3.3 | 5.2.E-03 | <i>Gm10383</i>       | AK156988     |
| A_55_P2107178 | 3.3 | 2.0.E-02 | <i>Gm12886</i>       | NM_001144948 |
| A_55_P1985351 | 3.3 | 2.6.E-03 | <i>Slc35f2</i>       | NM_028060    |
| A_51_P340668  | 3.3 | 4.8.E-03 | <i>Bcl9l</i>         | NM_030256    |
| A_55_P2440441 | 3.3 | 4.8.E-03 | <i>Wdhd1</i>         | NM_172598    |
| A_52_P15377   | 3.3 | 4.5.E-03 | <i>Wnt9b</i>         | NM_011719    |
| A_52_P495869  | 3.3 | 3.1.E-02 | <i>Mafb</i>          | NM_010658    |
| A_55_P2220748 | 3.3 | 7.0.E-03 | <i>Mep1b</i>         | NM_008586    |
| A_55_P2037737 | 3.3 | 6.7.E-03 | <i>N/A</i>           | N/A          |
| A_55_P2143623 | 3.3 | 3.7.E-02 | <i>Vmn2r48</i>       | NM_001105152 |
| A_55_P2255449 | 3.3 | 2.8.E-02 | <i>AI663975</i>      | AK033778     |

|               |     |          |                      |              |
|---------------|-----|----------|----------------------|--------------|
| A_55_P2124676 | 3.3 | 3.2.E-02 | <i>Epm2aip1</i>      | NM_175266    |
| A_51_P420577  | 3.3 | 8.5.E-03 | <i>Olfir983</i>      | NM_146827    |
| A_55_P2000598 | 3.3 | 6.0.E-03 | <i>8030411F24Rik</i> | NM_030135    |
| A_51_P452890  | 3.2 | 9.6.E-03 | <i>Ssxb1</i>         | NM_026492    |
| A_51_P417053  | 3.2 | 1.1.E-02 | <i>Tuft1</i>         | NM_011656    |
| A_51_P111455  | 3.2 | 2.6.E-02 | <i>Wdr77</i>         | NM_027432    |
| A_51_P460643  | 3.2 | 1.6.E-02 | <i>Hoxb3</i>         | NM_001079869 |
| A_55_P2268945 | 3.2 | 1.7.E-02 | <i>Gm17244</i>       | AK081449     |
| A_66_P138469  | 3.2 | 1.7.E-02 | <i>Gm11563</i>       | NM_001126320 |
| A_55_P2039514 | 3.2 | 6.5.E-03 | N/A                  | N/A          |
| A_55_P2105413 | 3.2 | 4.7.E-03 | <i>Mug1</i>          | NM_008645    |
| A_55_P2103756 | 3.2 | 8.1.E-03 | <i>Hic2</i>          | NM_178922    |
| A_55_P2371642 | 3.2 | 1.2.E-02 | <i>B230104I21Rik</i> | XR_104907    |
| A_51_P401343  | 3.2 | 4.9.E-03 | <i>Cldn14</i>        | NM_019500    |
| A_55_P1991001 | 3.2 | 8.9.E-03 | <i>Lman1l</i>        | NM_199222    |
| A_55_P2108165 | 3.2 | 1.0.E-02 | <i>Gm6907</i>        | NM_001164289 |
| A_52_P294977  | 3.2 | 1.4.E-02 | <i>Cd6</i>           | NM_009852    |
| A_55_P2181904 | 3.2 | 7.0.E-03 | <i>Cd164l2</i>       | NM_027152    |
| A_55_P2008443 | 3.2 | 3.3.E-02 | <i>Mybpc1</i>        | NM_175418    |
| A_66_P105270  | 3.2 | 7.3.E-03 | <i>Hao1</i>          | NM_010403    |
| A_55_P2082519 | 3.2 | 6.5.E-03 | <i>Olfir883</i>      | NM_146419    |
| A_55_P2053372 | 3.2 | 1.5.E-02 | <i>Rbfox3</i>        | NM_001039167 |
| A_55_P2034033 | 3.2 | 5.0.E-03 | <i>Il12rb1</i>       | NM_008353    |
| A_55_P2071731 | 3.2 | 6.1.E-03 | <i>Olfir75-ps1</i>   | Y15524       |
| A_55_P2170836 | 3.2 | 5.8.E-03 | N/A                  | XM_003084513 |
| A_55_P2083257 | 3.2 | 1.5.E-02 | <i>A3galt2</i>       | NM_001009819 |
| A_55_P1952404 | 3.2 | 9.1.E-03 | N/A                  | N/A          |
| A_55_P2077741 | 3.2 | 1.9.E-02 | <i>Slc38a11</i>      | NM_177074    |
| A_55_P2139221 | 3.2 | 1.5.E-02 | <i>4930594M22Ri</i>  | XR_035095    |
| A_55_P1995135 | 3.1 | 4.0.E-03 | <i>Casz1</i>         | NM_027195    |
| A_52_P404341  | 3.1 | 8.8.E-03 | <i>Tdo2</i>          | NM_019911    |
| A_55_P2004767 | 3.1 | 6.1.E-03 | <i>Gm5591</i>        | NM_001013810 |
| A_51_P216702  | 3.1 | 1.1.E-02 | <i>A130022J15Ri</i>  | NM_175313    |
| A_55_P2068306 | 3.1 | 8.3.E-03 | <i>Polr1b</i>        | AK052672     |
| A_55_P2117559 | 3.1 | 2.6.E-02 | <i>Siglec15</i>      | NM_001101038 |
| A_55_P2099363 | 3.1 | 1.0.E-02 | <i>Stac2</i>         | NM_146028    |
| A_66_P117022  | 3.1 | 5.5.E-03 | <i>Atp6v1e1</i>      | NM_007510    |
| A_55_P2044947 | 3.1 | 5.3.E-03 | N/A                  | BY352782     |
| A_55_P1953256 | 3.1 | 2.9.E-02 | <i>Ctnnd1</i>        | BC046589     |
| A_55_P2026295 | 3.1 | 9.5.E-03 | <i>Syne1</i>         | NM_153399    |
| A_51_P478881  | 3.1 | 5.3.E-03 | <i>Ces4a</i>         | NM_146213    |

|               |     |          |                     |              |
|---------------|-----|----------|---------------------|--------------|
| A_55_P2034285 | 3.1 | 9.3.E-03 | <i>Etnk2</i>        | AK031665     |
| A_52_P16752   | 3.1 | 3.8.E-03 | <i>Aox3</i>         | NM_023617    |
| A_55_P2166069 | 3.1 | 8.9.E-03 | <i>2310079G19Ri</i> | NM_027173    |
| A_55_P2026125 | 3.1 | 1.2.E-02 | <i>Srrm2</i>        | NM_175229    |
| A_51_P153423  | 3.1 | 1.1.E-02 | <i>Fndc1</i>        | NM_001081416 |
| A_55_P1965821 | 3.1 | 5.5.E-03 | <i>Uppt</i>         | NM_001081189 |
| A_55_P1967443 | 3.1 | 4.1.E-03 | N/A                 | N/A          |
| A_55_P2087345 | 3.1 | 6.5.E-03 | <i>Htr5a</i>        | NM_008314    |
| A_52_P131559  | 3.1 | 2.0.E-02 | <i>Srprb</i>        | NM_009275    |
| A_55_P1972040 | 3.1 | 4.1.E-03 | <i>Nox4</i>         | NM_015760    |
| A_55_P2422164 | 3.1 | 2.6.E-02 | <i>C130093G08Ri</i> | AI851140     |
| A_52_P466853  | 3.1 | 4.1.E-03 | <i>Bmyc</i>         | NM_023326    |
| A_55_P2054708 | 3.0 | 4.8.E-03 | N/A                 | AK143362     |
| A_55_P2266295 | 3.0 | 9.2.E-03 | <i>Fzd3</i>         | NM_021458    |
| A_55_P2077263 | 3.0 | 3.8.E-03 | <i>Cenpk</i>        | NM_021790    |
| A_51_P502872  | 3.0 | 1.5.E-02 | <i>2200002D01Ri</i> | NM_028179    |
| A_55_P2038126 | 3.0 | 4.5.E-03 | <i>Tpmt</i>         | NM_016785    |
| A_55_P2021423 | 3.0 | 1.5.E-02 | <i>Morn3</i>        | NM_029112    |
| A_55_P2175110 | 3.0 | 2.1.E-02 | <i>Ankdd1a</i>      | XM_357954    |
| A_55_P2169775 | 3.0 | 1.7.E-02 | <i>Ano3</i>         | N/A          |
| A_51_P455897  | 3.0 | 1.8.E-02 | <i>Fam64a</i>       | NM_144526    |
| A_52_P222230  | 3.0 | 2.3.E-02 | N/A                 | AK040896     |
| A_51_P502119  | 3.0 | 9.2.E-03 | <i>F11</i>          | NM_028066    |
| A_55_P2199457 | 3.0 | 1.0.E-02 | <i>B230378P21Ri</i> | NR_040277    |
| A_55_P2068560 | 3.0 | 4.0.E-03 | <i>Lyzl4</i>        | NM_026915    |
| A_51_P300709  | 3.0 | 5.9.E-03 | <i>Srm</i>          | NM_009272    |
| A_55_P1961400 | 3.0 | 4.2.E-03 | <i>Grid2ip</i>      | NM_133355    |
| A_55_P1958185 | 3.0 | 1.6.E-02 | <i>Hoxd11</i>       | NM_008273    |
| A_55_P2337706 | 3.0 | 3.0.E-02 | <i>1110065H08Ri</i> | AK004374     |
| A_55_P2186395 | 3.0 | 8.8.E-03 | <i>Gm6340</i>       | XM_887100    |
| A_55_P2037919 | 3.0 | 4.1.E-03 | <i>AA684185</i>     | AK139675     |
| A_55_P2141058 | 3.0 | 1.0.E-02 | <i>LOC100504710</i> | NM_001201389 |
| A_52_P272145  | 3.0 | 1.3.E-02 | N/A                 | N/A          |
| A_55_P2071344 | 3.0 | 2.1.E-02 | <i>Anapc1</i>       | AK054305     |
| A_55_P2180949 | 2.9 | 7.0.E-03 | <i>Lcp2</i>         | AK088552     |
| A_52_P682996  | 2.9 | 1.0.E-02 | N/A                 | N/A          |
| A_55_P2125588 | 2.9 | 5.3.E-03 | <i>Pdgfa</i>        | NM_008808    |
| A_55_P1974917 | 2.9 | 1.2.E-02 | <i>Olfir368</i>     | NM_146374    |
| A_55_P2186262 | 2.9 | 2.2.E-02 | <i>2400006E01Ri</i> | AK019103     |
| A_55_P2182112 | 2.9 | 4.7.E-03 | <i>4833439L19Ri</i> | NM_133797    |
| A_55_P2416494 | 2.9 | 1.7.E-02 | <i>8430426J06Ri</i> | XR_105749    |

|               |     |          |                      |              |
|---------------|-----|----------|----------------------|--------------|
| A_55_P2088028 | 2.9 | 1.2.E-02 | <i>Mtss1</i>         | NM_144800    |
| A_55_P2086525 | 2.9 | 1.5.E-02 | N/A                  | N/A          |
| A_55_P2322620 | 2.9 | 7.0.E-03 | N/A                  | AK046125     |
| A_51_P121962  | 2.9 | 3.4.E-02 | <i>Lphn3</i>         | AK051766     |
| A_55_P2109327 | 2.9 | 1.2.E-02 | <i>Ache</i>          | NM_009599    |
| A_55_P2195202 | 2.9 | 7.3.E-03 | <i>1700016K05Rik</i> | BU938278     |
| A_55_P2024679 | 2.9 | 8.9.E-03 | <i>Gm10765</i>       | XM_003084505 |
| A_55_P2099870 | 2.9 | 1.8.E-02 | <i>1190007F08Rik</i> | NM_001163721 |
| A_55_P2015169 | 2.9 | 8.7.E-03 | N/A                  | HQ875060     |
| A_51_P227004  | 2.9 | 7.5.E-03 | <i>Cks1b</i>         | NM_016904    |
| A_55_P2007886 | 2.9 | 9.1.E-03 | <i>Prss51</i>        | N/A          |
| A_55_P2127194 | 2.9 | 8.1.E-03 | N/A                  | N/A          |
| A_51_P434101  | 2.9 | 5.3.E-03 | <i>Herpud1</i>       | NM_022331    |
| A_55_P2131238 | 2.9 | 1.5.E-02 | <i>Ttc39a</i>        | NM_153392    |
| A_55_P2143708 | 2.9 | 1.1.E-02 | N/A                  | N/A          |
| A_55_P2183884 | 2.9 | 9.1.E-03 | <i>Mc4r</i>          | NM_016977    |
| A_55_P2040250 | 2.9 | 2.5.E-02 | <i>Raph1</i>         | N/A          |
| A_51_P187262  | 2.9 | 1.6.E-02 | <i>Mmp25</i>         | NM_001033339 |
| A_55_P1994487 | 2.9 | 1.6.E-02 | <i>Mamdc4</i>        | NM_001081199 |
| A_55_P1963006 | 2.9 | 1.0.E-02 | N/A                  | N/A          |
| A_55_P2101696 | 2.9 | 1.4.E-02 | <i>Gnat2</i>         | NM_008141    |
| A_66_P114449  | 2.9 | 9.6.E-03 | <i>Vps39</i>         | NM_147153    |
| A_55_P1956598 | 2.9 | 1.3.E-02 | N/A                  | BC019489     |
| A_55_P1996504 | 2.9 | 4.2.E-03 | <i>Abcg2</i>         | NM_011920    |
| A_55_P2124361 | 2.8 | 1.9.E-02 | N/A                  | N/A          |
| A_55_P2088355 | 2.8 | 7.0.E-03 | N/A                  | N/A          |
| A_55_P2067747 | 2.8 | 1.0.E-02 | <i>Psg21</i>         | NM_027403    |
| A_55_P1964613 | 2.8 | 2.8.E-02 | <i>Dnttip1</i>       | AK168315     |
| A_55_P2029732 | 2.8 | 5.0.E-03 | <i>C730027H18Rik</i> | NR_038040    |
| A_51_P316199  | 2.8 | 2.9.E-02 | <i>Olfir73</i>       | NM_054090    |
| A_66_P112024  | 2.8 | 1.3.E-02 | <i>Gm6816</i>        | XM_892675    |
| A_51_P517051  | 2.8 | 1.5.E-02 | <i>Gatsl3</i>        | NM_028022    |
| A_55_P2058988 | 2.8 | 1.3.E-02 | N/A                  | N/A          |
| A_55_P2347459 | 2.8 | 3.0.E-02 | <i>1110013I04Rik</i> | BY726277     |
| A_55_P2169445 | 2.8 | 8.1.E-03 | <i>Mfsd6</i>         | NM_133829    |
| A_55_P1992555 | 2.8 | 4.5.E-02 | <i>Gys2</i>          | NM_145572    |
| A_55_P2061495 | 2.8 | 1.0.E-02 | <i>Cks1b</i>         | NM_016904    |
| A_55_P1978895 | 2.8 | 1.5.E-02 | <i>Skint3</i>        | NM_177578    |
| A_55_P2024282 | 2.8 | 2.8.E-02 | <i>Gm16441</i>       | XM_001474528 |
| A_52_P344290  | 2.8 | 8.0.E-03 | <i>F2r</i>           | NM_010169    |
| A_55_P2361652 | 2.8 | 2.9.E-02 | <i>C230085N15Rik</i> | AK088035     |

|               |     |          |                     |              |
|---------------|-----|----------|---------------------|--------------|
| A_55_P2131168 | 2.8 | 1.5.E-02 | <i>Sv2c</i>         | NM_029210    |
| A_66_P107437  | 2.8 | 4.9.E-02 | <i>Sfxn5</i>        | NM_178639    |
| A_55_P1979019 | 2.8 | 1.5.E-02 | <i>Etnk2</i>        | NM_175443    |
| A_55_P2173398 | 2.8 | 5.0.E-03 | N/A                 | N/A          |
| A_55_P2220899 | 2.8 | 3.4.E-02 | <i>B230303O12Ri</i> | XR_107757    |
| A_55_P2090025 | 2.8 | 7.1.E-03 | <i>Mest</i>         | NM_008590    |
| A_55_P2290378 | 2.8 | 2.7.E-02 | <i>AU019176</i>     | BM228091     |
| A_55_P2083909 | 2.8 | 4.1.E-02 | N/A                 | N/A          |
| A_55_P2206254 | 2.8 | 2.9.E-02 | <i>LOC627096</i>    | AK147870     |
| A_55_P2048588 | 2.8 | 4.8.E-02 | <i>Cdk1</i>         | NM_007659    |
| A_55_P1967391 | 2.8 | 3.4.E-02 | <i>Antxr1</i>       | AK013005     |
| A_55_P2269700 | 2.8 | 3.5.E-02 | <i>Ccdc163</i>      | NM_026714    |
| A_51_P271068  | 2.8 | 9.5.E-03 | <i>Klf17</i>        | NM_029416    |
| A_55_P2160691 | 2.8 | 4.0.E-02 | N/A                 | CK031974     |
| A_55_P2050722 | 2.7 | 1.1.E-02 | N/A                 | N/A          |
| A_55_P2079569 | 2.7 | 1.5.E-02 | <i>Gm10555</i>      | XM_003086208 |
| A_55_P2424921 | 2.7 | 2.9.E-02 | <i>1300014J16Ri</i> | AK005005     |
| A_55_P1968664 | 2.7 | 1.1.E-02 | N/A                 | N/A          |
| A_51_P276235  | 2.7 | 2.0.E-02 | <i>Pnpla7</i>       | NM_146251    |
| A_55_P2182586 | 2.7 | 2.1.E-02 | <i>Esrp1</i>        | NM_194055    |
| A_51_P162162  | 2.7 | 1.0.E-02 | <i>Inmt</i>         | NM_009349    |
| A_55_P1991851 | 2.7 | 4.8.E-02 | <i>Speg</i>         | NM_001085370 |
| A_55_P2120000 | 2.7 | 4.0.E-02 | N/A                 | AK161418     |
| A_55_P2091153 | 2.7 | 4.2.E-03 | <i>BC051142</i>     | NM_001163855 |
| A_55_P2150392 | 2.7 | 2.9.E-02 | <i>Cpne5</i>        | NM_153166    |
| A_55_P2317480 | 2.7 | 6.3.E-03 | <i>E130104P22Ri</i> | AK053520     |
| A_66_P134265  | 2.7 | 9.2.E-03 | <i>Fam47e</i>       | NM_001170572 |
| A_52_P31543   | 2.7 | 3.4.E-02 | <i>Btg2</i>         | NM_007570    |
| A_55_P2151675 | 2.7 | 7.0.E-03 | N/A                 | AK164979     |
| A_51_P328818  | 2.7 | 2.9.E-02 | <i>Olf100</i>       | NM_207673    |
| A_55_P2157952 | 2.7 | 5.3.E-03 | <i>Gm10755</i>      | XM_003086133 |
| A_51_P408199  | 2.7 | 2.6.E-02 | <i>Krtap4-2</i>     | NM_026807    |
| A_52_P278336  | 2.7 | 2.2.E-02 | <i>Fbln5</i>        | NM_011812    |
| A_55_P2053714 | 2.7 | 3.1.E-02 | <i>AA619741</i>     | NR_033627    |
| A_51_P201338  | 2.7 | 1.5.E-02 | <i>Mtss1</i>        | NM_144800    |
| A_51_P491378  | 2.7 | 1.0.E-02 | <i>Csn1s1</i>       | NM_007784    |
| A_66_P107482  | 2.7 | 5.8.E-03 | <i>Arhgef33</i>     | NM_001145452 |
| A_52_P174884  | 2.7 | 3.3.E-02 | <i>Gabrq</i>        | NM_020488    |
| A_55_P2006762 | 2.7 | 1.0.E-02 | <i>Bzw1</i>         | NM_025824    |
| A_51_P102122  | 2.6 | 3.6.E-02 | <i>Myog</i>         | NM_031189    |
| A_55_P2112419 | 2.6 | 9.5.E-03 | N/A                 | N/A          |

|               |     |                               |              |
|---------------|-----|-------------------------------|--------------|
| A_55_P2148684 | 2.6 | 2.5.E-02 <i>Best1</i>         | NM_011913    |
| A_55_P2090254 | 2.6 | 4.4.E-02 <i>Sntg2</i>         | NM_172951    |
| A_55_P1972322 | 2.6 | 2.6.E-02 <i>Btg3</i>          | NM_009770    |
| A_55_P2061899 | 2.6 | 7.9.E-03 <i>N/A</i>           | N/A          |
| A_55_P1963915 | 2.6 | 1.1.E-02 <i>Gm7298</i>        | XM_001480274 |
| A_55_P1960366 | 2.6 | 1.1.E-02 <i>Fam47e</i>        | NM_001033478 |
| A_55_P2097763 | 2.6 | 1.9.E-02 <i>N/A</i>           | N/A          |
| A_55_P2263728 | 2.6 | 2.6.E-02 <i>AU045094</i>      | AU043288     |
| A_51_P401184  | 2.6 | 3.7.E-02 <i>Rarres1</i>       | NM_001164763 |
| A_55_P2217851 | 2.6 | 2.3.E-02 <i>4930453L07Rik</i> | AK015455     |
| A_55_P1957038 | 2.6 | 9.5.E-03 <i>Gstp2</i>         | NM_181796    |
| A_55_P2175065 | 2.6 | 1.6.E-02 <i>N/A</i>           | BC025829     |
| A_55_P2111649 | 2.6 | 1.3.E-02 <i>Mbd1</i>          | NM_013594    |
| A_55_P2182392 | 2.6 | 9.1.E-03 <i>Adat3</i>         | NM_001100606 |
| A_51_P372550  | 2.6 | 8.6.E-03 <i>Cgref1</i>        | NM_026770    |
| A_55_P2377645 | 2.6 | 4.9.E-02 <i>LOC10050494</i>   | XM_003086852 |
| A_51_P392967  | 2.6 | 2.9.E-02 <i>Zmynd10</i>       | NM_053253    |
| A_55_P2000182 | 2.6 | 2.0.E-02 <i>Slc5a6</i>        | NM_001177621 |
| A_55_P1967227 | 2.6 | 1.5.E-02 <i>Tmem158</i>       | NM_001002267 |
| A_51_P220062  | 2.6 | 4.1.E-02 <i>Mmp15</i>         | NM_008609    |
| A_66_P103052  | 2.6 | 1.9.E-02 <i>N/A</i>           | N/A          |
| A_55_P2044054 | 2.6 | 2.6.E-02 <i>AA465934</i>      | BB850827     |
| A_55_P2036367 | 2.6 | 1.5.E-02 <i>Ipcef1</i>        | NM_001170800 |
| A_55_P2007470 | 2.6 | 1.0.E-02 <i>Pdgfa</i>         | NM_008808    |
| A_51_P226527  | 2.6 | 2.5.E-02 <i>Vmn1r85</i>       | NM_145847    |
| A_55_P1967231 | 2.6 | 9.5.E-03 <i>Stbd1</i>         | NM_175096    |
| A_55_P2002893 | 2.6 | 2.2.E-02 <i>Pfkfb1</i>        | NM_008824    |
| A_51_P181423  | 2.6 | 1.9.E-02 <i>Olfir807</i>      | NM_146929    |
| A_55_P2011922 | 2.6 | 6.1.E-03 <i>March9</i>        | NM_001033262 |
| A_55_P2020410 | 2.6 | 8.7.E-03 <i>Mapk8</i>         | NM_016700    |
| A_51_P193336  | 2.6 | 7.4.E-03 <i>Nucb2</i>         | NM_016773    |
| A_55_P2128195 | 2.6 | 4.4.E-02 <i>Pm20d2</i>        | NM_001034867 |
| A_55_P2098865 | 2.6 | 7.5.E-03 <i>Accn5</i>         | NM_021370    |
| A_55_P1961014 | 2.6 | 7.8.E-03 <i>Selenbp1</i>      | NM_009150    |
| A_51_P179258  | 2.6 | 4.1.E-02 <i>Kif26b</i>        | NM_001161665 |
| A_55_P2092194 | 2.6 | 4.0.E-02 <i>1700106N22Rik</i> | NM_028576    |
| A_55_P2051566 | 2.6 | 1.4.E-02 <i>N/A</i>           | CD768206     |
| A_55_P2060303 | 2.6 | 7.5.E-03 <i>Mras</i>          | NM_008624    |
| A_55_P2074045 | 2.6 | 7.3.E-03 <i>N/A</i>           | N/A          |
| A_55_P2364971 | 2.6 | 3.8.E-02 <i>C77798</i>        | C77798       |
| A_55_P2018244 | 2.5 | 1.4.E-02 <i>Olfir1093</i>     | NM_146366    |



|               |     |          |                     |              |
|---------------|-----|----------|---------------------|--------------|
| A_55_P2016670 | 2.5 | 3.5.E-02 | <i>Alpk2</i>        | NM_001037294 |
| A_52_P512575  | 2.5 | 1.1.E-02 | <i>Hopx</i>         | NM_175606    |
| A_52_P130787  | 2.5 | 1.1.E-02 | <i>Kcna6</i>        | NM_013568    |
| A_51_P461191  | 2.5 | 2.9.E-02 | <i>Got11</i>        | NM_029674    |
| A_51_P222386  | 2.5 | 5.5.E-03 | <i>Tbc1d10a</i>     | NM_134023    |
| A_55_P1960659 | 2.5 | 9.2.E-03 | <i>Fer116</i>       | XM_905719    |
| A_55_P2137576 | 2.5 | 2.6.E-02 | <i>Nphp3</i>        | NM_028721    |
| A_55_P1962680 | 2.5 | 1.4.E-02 | <i>LOC100040231</i> | XM_001474135 |
| A_55_P2087647 | 2.5 | 2.0.E-02 | <i>Grhpr</i>        | NM_080289    |
| A_55_P2044803 | 2.5 | 2.8.E-02 | N/A                 | AK085886     |
| A_55_P2045549 | 2.5 | 8.8.E-03 | <i>Dpy19l1</i>      | NM_172920    |
| A_55_P2012572 | 2.5 | 5.6.E-03 | <i>Negr1</i>        | NM_001039094 |
| A_55_P2064486 | 2.5 | 2.7.E-02 | <i>Trim58</i>       | NM_001039047 |
| A_55_P2139878 | 2.5 | 9.6.E-03 | N/A                 | N/A          |
| A_55_P2002376 | 2.5 | 9.5.E-03 | <i>Srm</i>          | NM_009272    |
| A_55_P1979536 | 2.5 | 4.3.E-02 | <i>Hras1</i>        | NM_001130444 |
| A_55_P2144090 | 2.5 | 3.8.E-02 | N/A                 | N/A          |
| A_55_P2015088 | 2.5 | 1.7.E-02 | N/A                 | N/A          |
| A_52_P233305  | 2.5 | 2.0.E-02 | <i>Adamts12</i>     | NM_175501    |
| A_51_P514256  | 2.5 | 3.8.E-02 | <i>Tubb2b</i>       | NM_023716    |
| A_55_P2085835 | 2.5 | 7.9.E-03 | <i>5330417C22Ri</i> | NM_001033304 |
| A_51_P310649  | 2.5 | 8.5.E-03 | <i>Arsa</i>         | NM_009713    |
| A_55_P2008996 | 2.5 | 3.3.E-02 | <i>Gm10034</i>      | AK164250     |
| A_51_P521052  | 2.5 | 7.2.E-03 | <i>Ly6k</i>         | NM_029627    |
| A_55_P2158384 | 2.5 | 1.2.E-02 | <i>Aanat</i>        | NM_009591    |
| A_55_P2062171 | 2.5 | 1.6.E-02 | <i>Odf3</i>         | AK005883     |
| A_55_P2146789 | 2.5 | 1.8.E-02 | N/A                 | N/A          |
| A_55_P2107647 | 2.5 | 7.9.E-03 | N/A                 | N/A          |
| A_55_P2053556 | 2.5 | 7.7.E-03 | <i>Alpk3</i>        | NM_054085    |
| A_51_P344552  | 2.5 | 2.7.E-02 | <i>Irs4</i>         | NM_010572    |
| A_55_P1972039 | 2.5 | 1.0.E-02 | <i>Nox4</i>         | AK149398     |
| A_55_P1987953 | 2.5 | 1.5.E-02 | <i>Gm5938</i>       | NM_001085534 |
| A_52_P615401  | 2.5 | 1.6.E-02 | <i>Tpra1</i>        | NM_011906    |
| A_51_P108629  | 2.5 | 1.7.E-02 | <i>Prl3b1</i>       | NM_008865    |
| A_55_P2185367 | 2.5 | 2.8.E-02 | N/A                 | XM_003084895 |
| A_55_P2019428 | 2.5 | 7.9.E-03 | <i>Htr1d</i>        | NM_008309    |
| A_51_P193000  | 2.5 | 1.0.E-02 | <i>Bbs4</i>         | NM_175325    |
| A_51_P117794  | 2.5 | 1.3.E-02 | <i>Bik</i>          | NM_007546    |
| A_52_P537545  | 2.5 | 4.5.E-02 | <i>Smpd3</i>        | NM_021491    |
| A_66_P123683  | 2.5 | 1.5.E-02 | <i>Obfc2a</i>       | NM_028696    |
| A_51_P259318  | 2.5 | 5.6.E-03 | <i>Fbrs</i>         | NM_010183    |

|               |     |          |                      |              |
|---------------|-----|----------|----------------------|--------------|
| A_55_P1959891 | 2.5 | 1.1.E-02 | N/A                  | N/A          |
| A_51_P418725  | 2.5 | 1.4.E-02 | <i>Plekhf1</i>       | NM_024413    |
| A_55_P1988373 | 2.5 | 2.1.E-02 | <i>Mlf1ip</i>        | NM_027973    |
| A_55_P2019133 | 2.4 | 1.4.E-02 | <i>Fmn1</i>          | NM_001043322 |
| A_55_P2179974 | 2.4 | 4.7.E-02 | <i>Spsb1</i>         | NM_029035    |
| A_66_P128442  | 2.4 | 9.6.E-03 | <i>Rimbp3</i>        | NM_001033338 |
| A_52_P361081  | 2.4 | 4.9.E-02 | <i>Arhgef16</i>      | NM_001112744 |
| A_55_P2170514 | 2.4 | 2.8.E-02 | <i>Sfn</i>           | NM_018754    |
| A_55_P1953194 | 2.4 | 4.0.E-02 | <i>Uchl3</i>         | AK050278     |
| A_55_P2145506 | 2.4 | 3.0.E-02 | <i>Flt3l</i>         | U04807       |
| A_55_P1989150 | 2.4 | 4.5.E-02 | <i>Olfir294</i>      | NM_001011750 |
| A_51_P358316  | 2.4 | 6.8.E-03 | <i>Chga</i>          | NM_007693    |
| A_51_P201308  | 2.4 | 1.8.E-02 | <i>Moxd2</i>         | NM_139296    |
| A_55_P1987269 | 2.4 | 2.1.E-02 | <i>Olfir1257</i>     | NM_146982    |
| A_55_P2057777 | 2.4 | 1.6.E-02 | <i>Fgfr1</i>         | NM_010206    |
| A_55_P2032955 | 2.4 | 5.0.E-02 | <i>Pabpn1l</i>       | NM_001007462 |
| A_55_P2142334 | 2.4 | 1.5.E-02 | <i>Ly6h</i>          | NM_011837    |
| A_51_P129962  | 2.4 | 1.8.E-02 | <i>5930434B04Ril</i> | AK083582     |
| A_51_P386810  | 2.4 | 2.0.E-02 | <i>Gmppb</i>         | NM_177910    |
| A_55_P2199463 | 2.4 | 3.4.E-02 | <i>Tcfap2a</i>       | NM_011547    |
| A_52_P78875   | 2.4 | 1.5.E-02 | <i>Phf12</i>         | NM_174852    |
| A_51_P143446  | 2.4 | 3.2.E-02 | <i>Olfir1010</i>     | NM_207149    |
| A_55_P1967395 | 2.4 | 2.8.E-02 | N/A                  | N/A          |
| A_51_P134923  | 2.4 | 1.0.E-02 | <i>Rnf148</i>        | NM_027754    |
| A_51_P413216  | 2.4 | 3.7.E-02 | <i>Olfir1016</i>     | NM_001011758 |
| A_55_P2233547 | 2.4 | 8.7.E-03 | <i>9130214F15Ril</i> | AK020279     |
| A_52_P678393  | 2.4 | 1.8.E-02 | <i>Slc22a14</i>      | NM_001037749 |
| A_55_P2318955 | 2.4 | 3.1.E-02 | <i>4930417H01Ril</i> | AK144823     |
| A_55_P2167482 | 2.4 | 8.1.E-03 | N/A                  | N/A          |
| A_55_P2090484 | 2.4 | 1.7.E-02 | <i>Pde10a</i>        | NM_011866    |
| A_52_P436238  | 2.4 | 1.2.E-02 | <i>Odc1</i>          | NM_013614    |
| A_55_P2154740 | 2.4 | 3.7.E-02 | N/A                  | N/A          |
| A_55_P2098494 | 2.4 | 2.2.E-02 | N/A                  | BC058985     |
| A_52_P273821  | 2.4 | 1.3.E-02 | <i>Abhd5</i>         | NM_026179    |
| A_55_P2138422 | 2.4 | 1.3.E-02 | <i>Obox1</i>         | NM_027802    |
| A_55_P1961320 | 2.4 | 4.2.E-02 | <i>Tes</i>           | NM_207176    |
| A_51_P230537  | 2.4 | 4.3.E-02 | <i>Ccdc114</i>       | NM_001033243 |
| A_55_P2059961 | 2.4 | 3.8.E-02 | N/A                  | N/A          |
| A_55_P1959072 | 2.4 | 1.0.E-02 | <i>Clec2e</i>        | NM_153506    |
| A_55_P1976539 | 2.4 | 2.2.E-02 | <i>Nup62cl</i>       | NM_001081668 |
| A_55_P2143494 | 2.4 | 2.9.E-02 | <i>Doc2b</i>         | NM_007873    |

|               |     |          |                      |              |
|---------------|-----|----------|----------------------|--------------|
| A_51_P356842  | 2.4 | 2.1.E-02 | <i>Olfcr320</i>      | NM_207230    |
| A_52_P342159  | 2.4 | 7.8.E-03 | <i>Nfatc4</i>        | NM_023699    |
| A_55_P2118866 | 2.4 | 1.9.E-02 | <i>Cmah</i>          | NM_001111110 |
| A_51_P161554  | 2.4 | 6.4.E-03 | <i>Arid3b</i>        | NM_019689    |
| A_55_P2146678 | 2.4 | 1.9.E-02 | N/A                  | N/A          |
| A_55_P1962124 | 2.4 | 9.9.E-03 | N/A                  | N/A          |
| A_55_P2096174 | 2.4 | 7.7.E-03 | <i>LOC665792</i>     | XM_003085443 |
| A_55_P2074766 | 2.4 | 1.5.E-02 | <i>Mug2</i>          | NM_008646    |
| A_55_P2087157 | 2.4 | 9.8.E-03 | N/A                  | AK131168     |
| A_66_P135700  | 2.4 | 9.3.E-03 | <i>Cyp2d11</i>       | NM_001104531 |
| A_66_P133151  | 2.4 | 7.6.E-03 | N/A                  | AK020435     |
| A_55_P2149774 | 2.4 | 3.5.E-02 | <i>Vasn</i>          | NM_139307    |
| A_55_P1972436 | 2.3 | 1.2.E-02 | <i>Themis</i>        | NM_178666    |
| A_55_P2169784 | 2.3 | 1.1.E-02 | <i>Plod1</i>         | NM_011122    |
| A_55_P2016976 | 2.3 | 3.2.E-02 | <i>A530054K11Ri</i>  | NM_183146    |
| A_51_P262489  | 2.3 | 1.7.E-02 | <i>Sst</i>           | NM_009215    |
| A_51_P413147  | 2.3 | 1.0.E-02 | <i>Klk1b3</i>        | NM_008693    |
| A_51_P377812  | 2.3 | 2.2.E-02 | <i>1700011E24Rik</i> | NM_029298    |
| A_55_P1980550 | 2.3 | 1.5.E-02 | <i>Kifc5c-ps</i>     | XM_001000571 |
| A_51_P240136  | 2.3 | 3.5.E-02 | <i>Gng8</i>          | NM_010320    |
| A_55_P2000658 | 2.3 | 9.1.E-03 | <i>Gm15645</i>       | NR_033578    |
| A_51_P219483  | 2.3 | 4.2.E-02 | <i>Tsku</i>          | NM_001024619 |
| A_52_P368306  | 2.3 | 1.8.E-02 | <i>Tmem100</i>       | NM_026433    |
| A_55_P2099952 | 2.3 | 2.2.E-02 | <i>Car1</i>          | NM_009799    |
| A_52_P625215  | 2.3 | 1.5.E-02 | <i>Wfikkn2</i>       | NM_181819    |
| A_55_P2423518 | 2.3 | 1.5.E-02 | <i>B230369F24Rik</i> | AK050536     |
| A_52_P52637   | 2.3 | 2.2.E-02 | N/A                  | N/A          |
| A_52_P578634  | 2.3 | 2.7.E-02 | <i>Cela1</i>         | NM_033612    |
| A_55_P2044788 | 2.3 | 9.1.E-03 | N/A                  | N/A          |
| A_55_P1963041 | 2.3 | 1.7.E-02 | <i>Gm4861</i>        | NM_177665    |
| A_55_P1977096 | 2.3 | 1.0.E-02 | <i>Elk4</i>          | NM_007923    |
| A_55_P2036942 | 2.3 | 2.7.E-02 | <i>Gm4535</i>        | NM_001101644 |
| A_55_P2105563 | 2.3 | 1.2.E-02 | <i>1700104L18Rik</i> | AK007120     |
| A_51_P335981  | 2.3 | 1.3.E-02 | <i>Narf</i>          | NM_026272    |
| A_51_P408071  | 2.3 | 1.2.E-02 | <i>Kntc1</i>         | NM_001042421 |
| A_55_P2137840 | 2.3 | 7.4.E-03 | <i>4833442J19Rik</i> | NM_177101    |
| A_51_P238183  | 2.3 | 1.2.E-02 | <i>Etnk2</i>         | NM_175443    |
| A_55_P1991069 | 2.3 | 7.4.E-03 | <i>Gm885</i>         | NM_001033435 |
| A_55_P1978777 | 2.3 | 9.5.E-03 | <i>Zfp64</i>         | NM_009564    |
| A_52_P587738  | 2.3 | 2.4.E-02 | <i>P2ry2</i>         | NM_008773    |
| A_55_P2131506 | 2.3 | 1.7.E-02 | N/A                  | XR_105460    |

|               |     |          |                      |              |
|---------------|-----|----------|----------------------|--------------|
| A_55_P1978885 | 2.3 | 1.9.E-02 | <i>Gm10700</i>       | AK172359     |
| A_55_P1990648 | 2.3 | 7.8.E-03 | <i>Ndufaf4</i>       | NM_026742    |
| A_52_P431859  | 2.3 | 1.7.E-02 | <i>2010111I01Rik</i> | AK167772     |
| A_55_P2112986 | 2.3 | 1.2.E-02 | <i>Klk1b22</i>       | NM_010114    |
| A_52_P92472   | 2.3 | 1.6.E-02 | <i>N/A</i>           | N/A          |
| A_55_P2083649 | 2.3 | 1.7.E-02 | <i>Alas1</i>         | NM_020559    |
| A_66_P137048  | 2.3 | 2.4.E-02 | <i>Men1</i>          | NM_008583    |
| A_55_P2095153 | 2.3 | 1.3.E-02 | <i>Pdf</i>           | NM_026513    |
| A_55_P1998797 | 2.3 | 1.0.E-02 | <i>N/A</i>           | N/A          |
| A_55_P2093168 | 2.3 | 7.9.E-03 | <i>Rel2</i>          | BC038500     |
| A_55_P2046563 | 2.3 | 1.5.E-02 | <i>Cym</i>           | NM_001111143 |
| A_55_P2165839 | 2.3 | 2.9.E-02 | <i>Cebpe</i>         | NM_207131    |
| A_52_P190630  | 2.3 | 3.1.E-02 | <i>1700011F03Rik</i> | NM_028825    |
| A_51_P413545  | 2.3 | 1.3.E-02 | <i>Txndc11</i>       | NM_029582    |
| A_52_P81693   | 2.3 | 1.0.E-02 | <i>LOC100502592</i>  | XM_003084652 |
| A_55_P1956998 | 2.3 | 1.0.E-02 | <i>Dis3l2</i>        | NM_001172157 |
| A_55_P1953984 | 2.3 | 3.9.E-02 | <i>N/A</i>           | AK144838     |
| A_55_P2162432 | 2.3 | 1.6.E-02 | <i>D630029K05Ri</i>  | NR_027847    |
| A_51_P277006  | 2.3 | 4.0.E-02 | <i>Chst8</i>         | NM_175140    |
| A_55_P2172182 | 2.3 | 4.0.E-02 | <i>Olfr1138</i>      | NM_146639    |
| A_55_P2160686 | 2.3 | 2.3.E-02 | <i>Tsc22d1</i>       | NM_207652    |
| A_55_P2021953 | 2.3 | 2.1.E-02 | <i>Olfr700</i>       | NM_146600    |
| A_55_P2005883 | 2.2 | 1.6.E-02 | <i>Foxr1</i>         | NM_001033469 |
| A_55_P2009439 | 2.2 | 1.4.E-02 | <i>N/A</i>           | N/A          |
| A_55_P2013751 | 2.2 | 1.9.E-02 | <i>Tsga10</i>        | NM_207228    |
| A_51_P208870  | 2.2 | 3.0.E-02 | <i>Zdhhc24</i>       | NM_027476    |
| A_55_P2136817 | 2.2 | 1.4.E-02 | <i>Coro2b</i>        | NM_175484    |
| A_55_P2192961 | 2.2 | 9.1.E-03 | <i>Trim30b</i>       | NM_175648    |
| A_55_P1964237 | 2.2 | 1.5.E-02 | <i>4932418E24Rik</i> | NM_177841    |
| A_55_P2126528 | 2.2 | 1.8.E-02 | <i>N/A</i>           | N/A          |
| A_51_P440568  | 2.2 | 1.5.E-02 | <i>Stk19</i>         | NM_019442    |
| A_55_P1960522 | 2.2 | 2.8.E-02 | <i>N/A</i>           | BY109983     |
| A_55_P1992034 | 2.2 | 1.3.E-02 | <i>Epm2a</i>         | NM_010146    |
| A_55_P1989991 | 2.2 | 2.0.E-02 | <i>Fam149b</i>       | AK031973     |
| A_52_P18922   | 2.2 | 1.1.E-02 | <i>Chid1</i>         | NM_026522    |
| A_55_P2148340 | 2.2 | 2.6.E-02 | <i>N/A</i>           | N/A          |
| A_55_P2145029 | 2.2 | 2.6.E-02 | <i>Gm826</i>         | NM_001033411 |
| A_51_P497379  | 2.2 | 9.9.E-03 | <i>Olfr30</i>        | NM_146878    |
| A_55_P2026340 | 2.2 | 3.8.E-02 | <i>Fmo5</i>          | NM_001161765 |
| A_55_P2051577 | 2.2 | 3.8.E-02 | <i>N/A</i>           | N/A          |
| A_51_P192964  | 2.2 | 1.1.E-02 | <i>Clec12b</i>       | NM_001204223 |

|               |     |          |                      |              |
|---------------|-----|----------|----------------------|--------------|
| A_51_P502152  | 2.2 | 1.9.E-02 | <i>Slc19a1</i>       | NM_031196    |
| A_51_P448784  | 2.2 | 1.6.E-02 | <i>Nrsn1</i>         | NM_009513    |
| A_55_P2115582 | 2.2 | 2.6.E-02 | <i>Slc20a1</i>       | NM_015747    |
| A_55_P1958532 | 2.2 | 3.1.E-02 | <i>Hr</i>            | NM_021877    |
| A_55_P2116744 | 2.2 | 1.3.E-02 | <i>Xirp1</i>         | NM_011724    |
| A_55_P1964174 | 2.2 | 1.8.E-02 | <i>Nme1</i>          | NM_008704    |
| A_55_P2065424 | 2.2 | 1.4.E-02 | <i>Sstr2</i>         | NM_009217    |
| A_51_P313503  | 2.2 | 1.8.E-02 | <i>Olfir577</i>      | NM_147109    |
| A_55_P2032543 | 2.2 | 1.1.E-02 | <i>Cblc</i>          | NM_001161844 |
| A_52_P366047  | 2.2 | 1.5.E-02 | <i>Rpp40</i>         | NM_145938    |
| A_66_P127160  | 2.2 | 1.7.E-02 | <i>Eif2b3</i>        | NM_001111277 |
| A_55_P2043877 | 2.2 | 2.1.E-02 | <i>2300003K06Rik</i> | NM_001195383 |
| A_52_P333825  | 2.2 | 1.7.E-02 | <i>Tas2r118</i>      | NM_207022    |
| A_55_P1992495 | 2.2 | 2.4.E-02 | <i>Gpc4</i>          | X83577       |
| A_52_P339742  | 2.2 | 4.8.E-02 | <i>Cyb5r3</i>        | NM_029787    |
| A_55_P2054437 | 2.2 | 1.3.E-02 | <i>Ttpal</i>         | NM_029512    |
| A_55_P2143765 | 2.2 | 3.5.E-02 | <i>Ugt1a6b</i>       | NM_201410    |
| A_55_P2161410 | 2.2 | 4.4.E-02 | <i>Serpina3m</i>     | NM_009253    |
| A_52_P467232  | 2.2 | 1.0.E-02 | <i>Il1rap</i>        | NM_134103    |
| A_52_P321751  | 2.2 | 4.1.E-02 | <i>Narg2</i>         | AK046121     |
| A_55_P2049687 | 2.2 | 2.6.E-02 | <i>Efna2</i>         | NM_007909    |
| A_55_P2096545 | 2.2 | 4.1.E-02 | <i>R3hdml</i>        | NM_001099331 |
| A_65_P18756   | 2.2 | 3.1.E-02 | <i>Klf17</i>         | NM_029416    |
| A_55_P1966094 | 2.2 | 1.7.E-02 | N/A                  | N/A          |
| A_55_P2020286 | 2.2 | 1.5.E-02 | <i>Tmem179</i>       | NM_178915    |
| A_66_P112436  | 2.2 | 4.6.E-02 | <i>Prkar2b</i>       | NM_011158    |
| A_51_P297968  | 2.2 | 2.9.E-02 | <i>Pdia6</i>         | NM_027959    |
| A_51_P284716  | 2.2 | 1.9.E-02 | <i>4930407I10Rik</i> | NM_001166475 |
| A_55_P2008722 | 2.2 | 3.3.E-02 | <i>Gm13157</i>       | NM_001127189 |
| A_66_P115959  | 2.2 | 1.4.E-02 | <i>1700016H13Rik</i> | NM_001163550 |
| A_55_P1974522 | 2.2 | 1.1.E-02 | <i>A530099J19Rik</i> | NM_175688    |
| A_55_P1995133 | 2.2 | 1.9.E-02 | N/A                  | N/A          |
| A_55_P1991960 | 2.2 | 2.8.E-02 | <i>Nwd1</i>          | NM_176940    |
| A_52_P523368  | 2.1 | 1.4.E-02 | <i>Psap11</i>        | NM_175249    |
| A_55_P2205760 | 2.1 | 2.7.E-02 | <i>C88045</i>        | C86380       |
| A_55_P2039289 | 2.1 | 1.3.E-02 | <i>Hspb6</i>         | NM_001012401 |
| A_55_P1973352 | 2.1 | 1.1.E-02 | <i>LOC100503911</i>  | XR_106152    |
| A_55_P1982699 | 2.1 | 1.4.E-02 | <i>Gm16442</i>       | NM_001167148 |
| A_55_P2021490 | 2.1 | 2.1.E-02 | <i>Gm16386</i>       | AK144317     |
| A_55_P2009684 | 2.1 | 3.3.E-02 | <i>Zmiz1</i>         | AK169397     |
| A_51_P164203  | 2.1 | 2.9.E-02 | <i>Nme4</i>          | NM_019731    |

|               |     |          |                     |              |
|---------------|-----|----------|---------------------|--------------|
| A_52_P210909  | 2.1 | 4.0.E-02 | <i>Pkd2l2</i>       | NM_016927    |
| A_55_P2041738 | 2.1 | 9.8.E-03 | <i>Il15ra</i>       | NM_008358    |
| A_55_P2011286 | 2.1 | 2.6.E-02 | <i>Hopx</i>         | NM_175606    |
| A_55_P2219581 | 2.1 | 1.4.E-02 | <i>C76332</i>       | C76332       |
| A_55_P2099910 | 2.1 | 1.8.E-02 | <i>F730043M19Ri</i> | NR_015602    |
| A_55_P2126951 | 2.1 | 1.7.E-02 | <i>Zfp467</i>       | NM_001085417 |
| A_55_P2168118 | 2.1 | 2.0.E-02 | <i>4933406C10Ri</i> | AK041289     |
| A_55_P2005611 | 2.1 | 1.3.E-02 | <i>Olf476</i>       | NM_146924    |
| A_66_P119350  | 2.1 | 1.1.E-02 | <i>2310040G24Ri</i> | NR_040293    |
| A_55_P2176270 | 2.1 | 1.9.E-02 | <i>Gucy2e</i>       | NM_008192    |
| A_55_P2027852 | 2.1 | 1.9.E-02 | <i>Ccl25</i>        | NR_033527    |
| A_55_P1979014 | 2.1 | 1.1.E-02 | <i>Zfp648</i>       | NM_001204908 |
| A_51_P115229  | 2.1 | 1.6.E-02 | <i>Vmn1r81</i>      | NM_134210    |
| A_55_P2040567 | 2.1 | 1.5.E-02 | N/A                 | N/A          |
| A_55_P2398995 | 2.1 | 1.3.E-02 | <i>Lelp1</i>        | NM_027042    |
| A_55_P2409038 | 2.1 | 1.6.E-02 | <i>7630403G23Ri</i> | AK020190     |
| A_55_P2139703 | 2.1 | 1.8.E-02 | <i>Krtap5-4</i>     | NM_015809    |
| A_51_P162098  | 2.1 | 1.5.E-02 | <i>Ndufaf4</i>      | NM_026742    |
| A_52_P373694  | 2.1 | 4.3.E-02 | <i>Jph4</i>         | NM_177049    |
| A_51_P392090  | 2.1 | 1.1.E-02 | <i>Tmem19</i>       | NM_133683    |
| A_51_P214319  | 2.1 | 1.4.E-02 | <i>Cox11</i>        | NM_199008    |
| A_51_P378699  | 2.1 | 1.1.E-02 | <i>Sohlh2</i>       | NM_028937    |
| A_55_P2158181 | 2.1 | 1.9.E-02 | <i>Olf439</i>       | NM_146825    |
| A_55_P2165504 | 2.1 | 1.7.E-02 | N/A                 | AK153764     |
| A_52_P600822  | 2.1 | 1.8.E-02 | <i>Prkcz</i>        | NM_008860    |
| A_51_P124126  | 2.1 | 2.6.E-02 | <i>Cyp2d22</i>      | NM_019823    |
| A_55_P2162269 | 2.1 | 1.8.E-02 | <i>Bri3</i>         | NM_018772    |
| A_55_P1967478 | 2.1 | 4.7.E-02 | <i>Hbb-y</i>        | NM_008221    |
| A_55_P2067757 | 2.1 | 4.8.E-02 | <i>Psg27</i>        | NM_001037168 |
| A_51_P501018  | 2.1 | 2.8.E-02 | <i>Nek2</i>         | NM_010892    |
| A_55_P2414924 | 2.1 | 1.3.E-02 | <i>Luc7l</i>        | NM_028190    |
| A_55_P1969131 | 2.1 | 3.6.E-02 | <i>Cidec</i>        | NM_178373    |
| A_51_P219722  | 2.1 | 1.4.E-02 | <i>2310021H06Ri</i> | NM_025990    |
| A_51_P433778  | 2.1 | 1.6.E-02 | <i>Tert</i>         | NM_009354    |
| A_55_P2162204 | 2.1 | 3.9.E-02 | <i>Kctd15</i>       | NM_146188    |
| A_55_P2290388 | 2.1 | 1.3.E-02 | <i>Rorb</i>         | NM_001043354 |
| A_52_P188593  | 2.1 | 2.8.E-02 | N/A                 | AK049058     |
| A_55_P2020331 | 2.1 | 2.8.E-02 | <i>Camk1g</i>       | NM_144817    |
| A_51_P270005  | 2.1 | 2.9.E-02 | <i>Lrguk</i>        | NM_028886    |
| A_55_P2035400 | 2.1 | 3.5.E-02 | <i>Ripk4</i>        | NM_023663    |
| A_55_P2083233 | 2.1 | 4.2.E-02 | N/A                 | N/A          |

|               |     |          |                      |              |
|---------------|-----|----------|----------------------|--------------|
| A_55_P2066234 | 2.1 | 1.7.E-02 | <i>Arfp2</i>         | NM_029802    |
| A_52_P252737  | 2.1 | 2.7.E-02 | <i>Rangap1</i>       | NM_011241    |
| A_55_P2143976 | 2.1 | 3.8.E-02 | <i>Kcnd1</i>         | N/A          |
| A_55_P2142878 | 2.1 | 1.2.E-02 | <i>K230010J24Rii</i> | XM_484483    |
| A_55_P2175245 | 2.0 | 1.9.E-02 | <i>Tusc3</i>         | NM_030254    |
| A_51_P351137  | 2.0 | 2.6.E-02 | <i>Tbce</i>          | NM_178337    |
| A_55_P1982034 | 2.0 | 2.7.E-02 | N/A                  | N/A          |
| A_66_P111322  | 2.0 | 2.8.E-02 | <i>Gm5567</i>        | NM_001004182 |
| A_52_P295755  | 2.0 | 2.4.E-02 | <i>A830005F24Rii</i> | XM_001473764 |
| A_51_P158061  | 2.0 | 2.8.E-02 | <i>Dalrd3</i>        | NM_026378    |
| A_52_P24631   | 2.0 | 3.6.E-02 | <i>Azin1</i>         | NM_018745    |
| A_51_P408082  | 2.0 | 2.5.E-02 | <i>Apoa1</i>         | NM_009692    |
| A_55_P2045658 | 2.0 | 2.3.E-02 | <i>Nme6</i>          | NM_018757    |
| A_55_P2146590 | 2.0 | 3.2.E-02 | <i>1810011O10Rii</i> | NM_026931    |
| A_55_P2041713 | 2.0 | 2.8.E-02 | <i>Gas2</i>          | AK142903     |
| A_51_P261204  | 2.0 | 2.6.E-02 | <i>Foxi2</i>         | NM_183193    |
| A_55_P2125972 | 2.0 | 1.8.E-02 | <i>Gorasp1</i>       | NM_028976    |
| A_55_P1964717 | 2.0 | 2.4.E-02 | <i>Gm10398</i>       | AK131726     |
| A_55_P1970126 | 2.0 | 1.5.E-02 | <i>Heatr5b</i>       | NM_001081179 |
| A_55_P2142724 | 2.0 | 4.6.E-02 | N/A                  | N/A          |
| A_66_P135194  | 2.0 | 1.5.E-02 | <i>Yrdc</i>          | NM_153566    |
| A_55_P2167123 | 2.0 | 2.0.E-02 | <i>Gm12839</i>       | NR_033575    |
| A_55_P2153391 | 2.0 | 1.9.E-02 | <i>Palm2</i>         | NM_172868    |
| A_55_P2104119 | 2.0 | 2.2.E-02 | N/A                  | N/A          |
| A_55_P2283207 | 2.0 | 1.6.E-02 | <i>Maz</i>           | NM_010772    |
| A_55_P1970062 | 2.0 | 4.0.E-02 | <i>Igsf9b</i>        | NM_001033323 |
| A_55_P2075459 | 2.0 | 1.8.E-02 | <i>Dtnb</i>          | AJ003007     |
| A_51_P358700  | 2.0 | 4.4.E-02 | <i>Olf1221</i>       | NM_146902    |
| A_55_P2006832 | 2.0 | 3.8.E-02 | <i>Xkr4</i>          | NM_001011874 |
| A_55_P2107357 | 2.0 | 3.5.E-02 | <i>LOC100042049</i>  | NR_004442    |
| A_55_P2119962 | 2.0 | 3.0.E-02 | <i>1110034G24Rii</i> | NM_028637    |
| A_51_P428578  | 2.0 | 2.8.E-02 | <i>Fam134b</i>       | NM_025459    |
| A_55_P1959985 | 2.0 | 1.9.E-02 | <i>Alas1</i>         | NM_020559    |
| A_51_P449614  | 2.0 | 3.1.E-02 | <i>1700006A11Rii</i> | NM_027939    |
| A_52_P456158  | 2.0 | 1.9.E-02 | <i>Fchsd1</i>        | NM_175684    |
| A_55_P2177233 | 2.0 | 3.0.E-02 | <i>Abhd5</i>         | NM_026179    |
| A_55_P2050019 | 2.0 | 2.4.E-02 | <i>Scml2</i>         | NM_133194    |
| A_51_P251357  | 2.0 | 2.8.E-02 | <i>Ctps</i>          | NM_016748    |
| A_55_P2103831 | 2.0 | 1.4.E-02 | <i>Gm6653</i>        | XR_035409    |
| A_51_P267783  | 2.0 | 2.6.E-02 | <i>Il11</i>          | NM_008350    |
| A_55_P1970949 | 2.0 | 1.6.E-02 | N/A                  | N/A          |

|               |     |          |                      |              |
|---------------|-----|----------|----------------------|--------------|
| A_51_P387868  | 2.0 | 1.7.E-02 | <i>Tekt4</i>         | NM_027951    |
| A_55_P1977303 | 2.0 | 3.1.E-02 | <i>Pde11a</i>        | AK050924     |
| A_55_P2046744 | 2.0 | 3.9.E-02 | <i>Cspg5</i>         | NM_001166273 |
| A_55_P2153923 | 2.0 | 1.6.E-02 | <i>Slc17a5</i>       | NM_172773    |
| A_51_P403610  | 2.0 | 2.6.E-02 | <i>Olfr1339</i>      | NM_146852    |
| A_51_P247542  | 2.0 | 2.0.E-02 | <i>Ttl6</i>          | NM_172799    |
| A_55_P2032363 | 2.0 | 2.2.E-02 | <i>Tomm40l</i>       | NM_001037170 |
| A_55_P1968808 | 2.0 | 2.7.E-02 | <i>Wipi1</i>         | NM_145940    |
| A_55_P2130448 | 2.0 | 1.5.E-02 | N/A                  | N/A          |
| A_66_P125005  | 2.0 | 1.7.E-02 | <i>Gm9648</i>        | AK085591     |
| A_55_P2026420 | 2.0 | 2.3.E-02 | <i>Pou6f1</i>        | NM_010127    |
| A_52_P424462  | 2.0 | 2.0.E-02 | <i>Ero11b</i>        | NM_026184    |
| A_55_P2113078 | 2.0 | 2.6.E-02 | <i>Rem1</i>          | NM_009047    |
| A_55_P2181216 | 2.0 | 2.6.E-02 | N/A                  | N/A          |
| A_51_P198835  | 2.0 | 2.2.E-02 | <i>Dnajb9</i>        | NM_013760    |
| A_51_P484978  | 2.0 | 2.4.E-02 | <i>Cblc</i>          | NM_023224    |
| A_51_P228171  | 2.0 | 2.3.E-02 | <i>Cenpp</i>         | NM_025495    |
| A_55_P2107334 | 2.0 | 1.5.E-02 | <i>Trim14</i>        | NM_029077    |
| A_55_P2413069 | 2.0 | 2.5.E-02 | N/A                  | AK016955     |
| A_55_P2412329 | 2.0 | 2.2.E-02 | <i>4930581F22Rik</i> | AK157006     |
| A_55_P1953411 | 2.0 | 1.7.E-02 | <i>Efcab3</i>        | AK162207     |
| A_55_P1969560 | 2.0 | 1.7.E-02 | N/A                  | N/A          |
| A_55_P2036176 | 2.0 | 1.9.E-02 | <i>Mcf2l</i>         | NM_178076    |
| A_55_P2257381 | 2.0 | 4.3.E-02 | <i>LOC100503619</i>  | XR_105802    |
| A_55_P2100928 | 2.0 | 4.4.E-02 | <i>Ptgds</i>         | NM_008963    |
| A_52_P583155  | 2.0 | 1.9.E-02 | <i>Ykt6</i>          | NM_019661    |
| A_55_P2173199 | 2.0 | 3.2.E-02 | <i>Vmn2r4</i>        | NM_001104615 |
| A_55_P2001494 | 2.0 | 1.6.E-02 | <i>Kitl</i>          | NM_013598    |
| A_55_P2000210 | 2.0 | 4.3.E-02 | N/A                  | AK141402     |
| A_55_P2279777 | 2.0 | 2.8.E-02 | <i>2810404M03Rik</i> | AK012985     |
| A_52_P350111  | 2.0 | 2.4.E-02 | <i>Cyth1</i>         | NM_011180    |
| A_55_P2127243 | 2.0 | 3.8.E-02 | <i>Tpsb2</i>         | NM_010781    |
| A_55_P2130393 | 2.0 | 4.0.E-02 | <i>Pnpla1</i>        | NM_001034885 |
| A_51_P385351  | 2.0 | 3.1.E-02 | <i>Slc44a3</i>       | NM_145394    |
| A_55_P2072872 | 1.9 | 1.6.E-02 | <i>Lpin2</i>         | AK033662     |
| A_51_P306047  | 1.9 | 2.3.E-02 | <i>Sec13</i>         | NM_024206    |
| A_51_P385598  | 1.9 | 1.6.E-02 | <i>Slc37a4</i>       | NM_008063    |
| A_55_P1995173 | 1.9 | 1.8.E-02 | <i>Odc1</i>          | NM_013614    |
| A_55_P2059890 | 1.9 | 3.2.E-02 | <i>Fdx1</i>          | NM_007996    |
| A_55_P2029252 | 1.9 | 1.3.E-02 | N/A                  | N/A          |
| A_55_P2096722 | 1.9 | 1.9.E-02 | N/A                  | CF621068     |



|               |     |                               |              |
|---------------|-----|-------------------------------|--------------|
| A_55_P2151797 | 1.9 | 1.4.E-02 <i>Dis3l2</i>        | NM_001172157 |
| A_51_P291766  | 1.9 | 2.2.E-02 <i>Olfir521</i>      | NM_146356    |
| A_55_P1978651 | 1.9 | 2.2.E-02 <i>Wasf3</i>         | NM_145155    |
| A_51_P240801  | 1.9 | 1.6.E-02 <i>Tmem173</i>       | NM_028261    |
| A_55_P2171493 | 1.9 | 2.4.E-02 <i>BC030867</i>      | NM_153544    |
| A_51_P163578  | 1.9 | 2.0.E-02 <i>Ugt2b35</i>       | NM_172881    |
| A_55_P2064635 | 1.9 | 4.7.E-02 <i>N/A</i>           | N/A          |
| A_55_P2184385 | 1.9 | 2.5.E-02 <i>N/A</i>           | N/A          |
| A_55_P2136289 | 1.9 | 4.2.E-02 <i>Ripk4</i>         | BC057871     |
| A_55_P2422650 | 1.9 | 2.9.E-02 <i>5031425E22Rik</i> | AK017143     |
| A_55_P2181348 | 1.9 | 2.9.E-02 <i>N/A</i>           | BY742470     |
| A_51_P161691  | 1.9 | 1.8.E-02 <i>Coq7</i>          | NM_009940    |
| A_52_P508277  | 1.9 | 1.4.E-02 <i>Pramel</i>        | XM_885719    |
| A_55_P1956624 | 1.9 | 1.8.E-02 <i>Gm14431</i>       | NM_001177406 |
| A_52_P520408  | 1.9 | 3.0.E-02 <i>Serp1</i>         | NM_030685    |
| A_66_P111594  | 1.9 | 3.3.E-02 <i>V1ra8</i>         | NM_053223    |
| A_55_P1982524 | 1.9 | 2.9.E-02 <i>Cyhr1</i>         | NM_019396    |
| A_55_P2025073 | 1.9 | 2.2.E-02 <i>Csf1r</i>         | NM_001037859 |
| A_51_P429472  | 1.9 | 2.1.E-02 <i>Fam188a</i>       | NM_024185    |
| A_55_P1966874 | 1.9 | 3.7.E-02 <i>Rtbdn</i>         | NM_144929    |
| A_55_P2130109 | 1.9 | 1.8.E-02 <i>Nmt2</i>          | NM_008708    |
| A_51_P382805  | 1.9 | 2.4.E-02 <i>Zpbp2</i>         | NM_027061    |
| A_55_P2116889 | 1.9 | 2.0.E-02 <i>Hax1</i>          | NM_011826    |
| A_55_P2010858 | 1.9 | 2.4.E-02 <i>Mrps23</i>        | NM_024174    |
| A_55_P1978825 | 1.9 | 2.8.E-02 <i>Gm10556</i>       | XR_107098    |
| A_55_P2029846 | 1.9 | 2.4.E-02 <i>BC031353</i>      | NM_001113283 |
| A_51_P208603  | 1.9 | 2.7.E-02 <i>Dio2</i>          | NM_010050    |
| A_66_P108451  | 1.9 | 1.7.E-02 <i>N/A</i>           | N/A          |
| A_55_P2082806 | 1.9 | 4.4.E-02 <i>Trib1</i>         | NM_144549    |
| A_51_P490678  | 1.9 | 3.4.E-02 <i>Trim68</i>        | NM_198012    |
| A_55_P1967350 | 1.9 | 3.3.E-02 <i>Ugt2b35</i>       | NM_172881    |
| A_55_P2341950 | 1.9 | 4.2.E-02 <i>Crebzf</i>        | NM_145151    |
| A_55_P1964363 | 1.9 | 1.6.E-02 <i>Kctd14</i>        | NM_001012434 |
| A_55_P2002743 | 1.9 | 4.4.E-02 <i>N/A</i>           | N/A          |
| A_51_P438555  | 1.9 | 4.4.E-02 <i>4930412D23Rik</i> | XM_001473476 |
| A_55_P2109337 | 1.9 | 3.1.E-02 <i>Gba2</i>          | NM_172692    |
| A_51_P421804  | 1.9 | 1.6.E-02 <i>Timm9</i>         | NM_013896    |
| A_55_P2157751 | 1.9 | 3.1.E-02 <i>Stk35</i>         | NM_183262    |
| A_52_P473419  | 1.9 | 4.2.E-02 <i>Epb4.114a</i>     | NM_013512    |
| A_55_P2045697 | 1.9 | 2.7.E-02 <i>Sirt7</i>         | NM_153056    |
| A_55_P1961700 | 1.9 | 1.7.E-02 <i>Ush2a</i>         | DQ463440     |

|               |     |                             |              |
|---------------|-----|-----------------------------|--------------|
| A_51_P319379  | 1.9 | 2.4.E-02 <i>Tmx4</i>        | NM_029148    |
| A_55_P2106514 | 1.9 | 1.7.E-02 <i>Scn2a1</i>      | NM_001099298 |
| A_66_P138053  | 1.9 | 3.8.E-02 <i>Gm9917</i>      | XR_105317    |
| A_51_P271503  | 1.9 | 3.4.E-02 <i>Il1r1</i>       | NM_008362    |
| A_55_P2210315 | 1.9 | 2.0.E-02 <i>Get4</i>        | NM_026269    |
| A_51_P362959  | 1.9 | 3.1.E-02 <i>Fbxo36</i>      | NM_025386    |
| A_55_P2081035 | 1.9 | 2.6.E-02 <i>Gpr25</i>       | NM_001101516 |
| A_52_P56636   | 1.9 | 1.9.E-02 <i>Chia</i>        | NM_023186    |
| A_55_P2035102 | 1.9 | 1.7.E-02 <i>Odc1</i>        | BC083122     |
| A_55_P1964752 | 1.9 | 3.6.E-02 <i>Slc23a3</i>     | NM_194333    |
| A_51_P377376  | 1.9 | 3.5.E-02 <i>Gnl3</i>        | NM_153547    |
| A_55_P2027392 | 1.9 | 2.9.E-02 <i>Gpr146</i>      | NM_030258    |
| A_55_P2053251 | 1.9 | 3.1.E-02 <i>Gabrg3</i>      | NM_008074    |
| A_51_P187901  | 1.9 | 3.2.E-02 <i>Nop56</i>       | NM_024193    |
| A_52_P538470  | 1.9 | 3.0.E-02 <i>Spats2l</i>     | NM_144882    |
| A_55_P2039530 | 1.9 | 3.9.E-02 <i>Gm10724</i>     | XM_003086271 |
| A_55_P2066927 | 1.9 | 3.1.E-02 <i>Galt</i>        | AK088379     |
| A_52_P322421  | 1.9 | 2.9.E-02 <i>Mpzl2</i>       | NM_007962    |
| A_51_P386270  | 1.9 | 2.5.E-02 <i>Cyp2d12</i>     | NM_201360    |
| A_55_P2298158 | 1.9 | 3.2.E-02 <i>D8Erttd620e</i> | BB618401     |
| A_55_P2019964 | 1.9 | 2.5.E-02 <i>Lancl1</i>      | NM_001190985 |
| A_55_P2170978 | 1.9 | 2.2.E-02 <i>Ankrd13d</i>    | NM_026720    |
| A_55_P2177614 | 1.9 | 2.1.E-02 <i>Srsf3</i>       | NM_013663    |
| A_55_P2044942 | 1.9 | 3.8.E-02 <i>N/A</i>         | N/A          |
| A_51_P295034  | 1.9 | 1.9.E-02 <i>Klk1b4</i>      | NM_010915    |
| A_55_P2092125 | 1.9 | 2.5.E-02 <i>N/A</i>         | N/A          |
| A_51_P318856  | 1.9 | 2.1.E-02 <i>Glyat</i>       | NM_145935    |
| A_55_P2067076 | 1.9 | 2.9.E-02 <i>N/A</i>         | AK135112     |
| A_55_P1992934 | 1.9 | 3.5.E-02 <i>N/A</i>         | N/A          |
| A_55_P2131428 | 1.9 | 2.4.E-02 <i>Tlr5</i>        | NM_016928    |
| A_55_P1994550 | 1.9 | 1.7.E-02 <i>Shank1</i>      | NM_001034115 |
| A_51_P349281  | 1.9 | 2.7.E-02 <i>Nckap5l</i>     | NM_001001884 |
| A_55_P2067116 | 1.9 | 1.7.E-02 <i>Dclre1c</i>     | NM_175683    |
| A_66_P113708  | 1.9 | 3.6.E-02 <i>Nespas</i>      | NR_002846    |
| A_66_P106711  | 1.9 | 3.5.E-02 <i>Hhip1l</i>      | NM_001044380 |
| A_51_P253984  | 1.9 | 1.8.E-02 <i>Pcp4</i>        | NM_008791    |
| A_55_P2250164 | 1.9 | 2.9.E-02 <i>Pcdhgc5</i>     | NM_033583    |
| A_55_P2158866 | 1.9 | 4.1.E-02 <i>Nme6</i>        | NM_018757    |
| A_55_P2183015 | 1.8 | 2.0.E-02 <i>P2rx4</i>       | NM_011026    |
| A_52_P26953   | 1.8 | 3.8.E-02 <i>Ergic2</i>      | NM_026355    |
| A_55_P1978471 | 1.8 | 1.9.E-02 <i>N/A</i>         | N/A          |

|               |     |          |                      |              |
|---------------|-----|----------|----------------------|--------------|
| A_66_P130560  | 1.8 | 1.7.E-02 | N/A                  | N/A          |
| A_66_P114985  | 1.8 | 3.0.E-02 | N/A                  | N/A          |
| A_55_P2022258 | 1.8 | 4.7.E-02 | N/A                  | AF012163     |
| A_51_P414889  | 1.8 | 2.5.E-02 | <i>Ifi35</i>         | NM_027320    |
| A_55_P1959595 | 1.8 | 3.2.E-02 | <i>Fmo5</i>          | NM_001161765 |
| A_55_P2076941 | 1.8 | 3.0.E-02 | <i>Lrr1</i>          | NM_001081406 |
| A_51_P510939  | 1.8 | 2.4.E-02 | <i>Chchd7</i>        | NM_181391    |
| A_51_P391616  | 1.8 | 2.9.E-02 | <i>Agxt2l1</i>       | NM_027907    |
| A_55_P2160243 | 1.8 | 4.0.E-02 | N/A                  | N/A          |
| A_52_P457339  | 1.8 | 2.6.E-02 | <i>Gm1965</i>        | NM_001033491 |
| A_55_P2033987 | 1.8 | 3.0.E-02 | N/A                  | N/A          |
| A_52_P207964  | 1.8 | 3.4.E-02 | <i>Mrps18b</i>       | NM_025878    |
| A_51_P245414  | 1.8 | 2.9.E-02 | <i>Klk1</i>          | NM_010639    |
| A_51_P353543  | 1.8 | 3.2.E-02 | <i>Magee2</i>        | NM_053206    |
| A_55_P1992174 | 1.8 | 2.3.E-02 | <i>Tars2</i>         | NM_001163619 |
| A_55_P2095844 | 1.8 | 2.6.E-02 | <i>Kalrn</i>         | NM_001164268 |
| A_55_P2017343 | 1.8 | 4.2.E-02 | <i>Olfir767</i>      | NM_146318    |
| A_55_P2015267 | 1.8 | 3.1.E-02 | N/A                  | N/A          |
| A_52_P317040  | 1.8 | 2.6.E-02 | <i>Edem2</i>         | NM_145537    |
| A_55_P2017689 | 1.8 | 2.2.E-02 | <i>Gprc5c</i>        | NM_147217    |
| A_55_P1952775 | 1.8 | 4.8.E-02 | <i>Olfir559</i>      | NM_147112    |
| A_55_P2159791 | 1.8 | 4.0.E-02 | <i>Serpinb3d</i>     | NM_201376    |
| A_55_P2078460 | 1.8 | 4.9.E-02 | N/A                  | N/A          |
| A_55_P2075268 | 1.8 | 2.8.E-02 | <i>Tmem216</i>       | NM_026798    |
| A_55_P2001481 | 1.8 | 2.9.E-02 | <i>Pde6c</i>         | NM_033614    |
| A_55_P1976829 | 1.8 | 2.9.E-02 | <i>Fam165b</i>       | N/A          |
| A_55_P2068486 | 1.8 | 1.9.E-02 | <i>Arfgap1</i>       | NM_001177706 |
| A_51_P367060  | 1.8 | 1.9.E-02 | <i>Ifrd1</i>         | NM_013562    |
| A_51_P120066  | 1.8 | 2.5.E-02 | <i>9330151L19Rik</i> | NR_033222    |
| A_55_P2026894 | 1.8 | 2.8.E-02 | N/A                  | N/A          |
| A_51_P250445  | 1.8 | 5.0.E-02 | <i>Zfp276</i>        | NM_020497    |
| A_52_P164709  | 1.8 | 2.0.E-02 | <i>Poc1a</i>         | NM_027354    |
| A_52_P587642  | 1.8 | 4.5.E-02 | <i>Ddx19a</i>        | NM_007916    |
| A_55_P2215880 | 1.8 | 3.1.E-02 | <i>Ephb2</i>         | NM_010142    |
| A_55_P2053491 | 1.8 | 2.3.E-02 | <i>Pdia6</i>         | NM_027959    |
| A_51_P342307  | 1.8 | 3.0.E-02 | <i>Olfir732</i>      | NM_146665    |
| A_55_P2244971 | 1.8 | 3.1.E-02 | <i>4930404O17Rik</i> | BY714618     |
| A_55_P1975832 | 1.8 | 2.3.E-02 | <i>1810009N02Rik</i> | NM_026939    |
| A_55_P1973813 | 1.8 | 3.6.E-02 | N/A                  | N/A          |
| A_55_P2079324 | 1.8 | 3.9.E-02 | <i>Sephs2</i>        | NM_009266    |
| A_55_P2109752 | 1.8 | 3.8.E-02 | <i>Nans</i>          | NM_053179    |

|               |     |          |                      |              |
|---------------|-----|----------|----------------------|--------------|
| A_52_P237792  | 1.8 | 1.9.E-02 | <i>Slc19a1</i>       | NM_031196    |
| A_66_P101703  | 1.8 | 2.0.E-02 | <i>Krtap5-5</i>      | NM_001037822 |
| A_55_P2183032 | 1.8 | 3.9.E-02 | <i>Zfp787</i>        | AK018745     |
| A_52_P185343  | 1.8 | 2.6.E-02 | <i>Gna13</i>         | AK011851     |
| A_51_P269320  | 1.8 | 4.0.E-02 | <i>Adsl</i>          | NM_009634    |
| A_55_P2106201 | 1.8 | 2.3.E-02 | N/A                  | N/A          |
| A_55_P2046055 | 1.8 | 3.2.E-02 | <i>Arhgap42</i>      | AK018520     |
| A_51_P330428  | 1.8 | 3.8.E-02 | <i>Eif4ebp1</i>      | NM_007918    |
| A_55_P2000930 | 1.8 | 2.9.E-02 | <i>Ccnyl1</i>        | NM_001097644 |
| A_52_P148658  | 1.8 | 2.5.E-02 | <i>Mettl22</i>       | NM_146247    |
| A_52_P348720  | 1.8 | 3.3.E-02 | <i>Rhobtb3</i>       | NM_028493    |
| A_55_P2020188 | 1.8 | 4.3.E-02 | N/A                  | N/A          |
| A_55_P1980836 | 1.8 | 4.3.E-02 | N/A                  | EF154513     |
| A_52_P108850  | 1.8 | 3.1.E-02 | <i>St8sia1</i>       | NM_011374    |
| A_55_P2023352 | 1.8 | 2.6.E-02 | N/A                  | N/A          |
| A_55_P2138366 | 1.8 | 3.3.E-02 | <i>Xpo4</i>          | NM_020506    |
| A_52_P404329  | 1.8 | 5.0.E-02 | <i>Saa4</i>          | NM_011316    |
| A_55_P1952925 | 1.8 | 2.2.E-02 | <i>AI854703</i>      | NR_027236    |
| A_51_P118223  | 1.8 | 3.5.E-02 | <i>Gm1943</i>        | NR_002928    |
| A_55_P2022049 | 1.8 | 2.9.E-02 | <i>Klf15</i>         | NM_023184    |
| A_55_P2077048 | 1.8 | 4.9.E-02 | <i>Itih5</i>         | NM_172471    |
| A_55_P2031939 | 1.8 | 2.8.E-02 | <i>Aqp4</i>          | NM_009700    |
| A_55_P1994190 | 1.8 | 3.6.E-02 | <i>Heph</i>          | NM_181273    |
| A_55_P1988102 | 1.8 | 2.4.E-02 | <i>Hmbs</i>          | NM_013551    |
| A_51_P465292  | 1.8 | 4.0.E-02 | <i>Hnmt</i>          | NM_080462    |
| A_55_P2145606 | 1.8 | 3.5.E-02 | <i>Kmo</i>           | NM_133809    |
| A_55_P2024763 | 1.8 | 5.0.E-02 | <i>Lama3</i>         | NM_010680    |
| A_55_P2068148 | 1.8 | 2.8.E-02 | <i>Pias1</i>         | NM_019663    |
| A_55_P2370931 | 1.8 | 3.6.E-02 | <i>AU017674</i>      | CK334688     |
| A_52_P562267  | 1.8 | 2.2.E-02 | <i>9130409I23Rik</i> | NM_001033819 |
| A_52_P188678  | 1.8 | 3.9.E-02 | <i>Pvrl2</i>         | NM_001159724 |
| A_55_P1966690 | 1.8 | 3.3.E-02 | <i>Cyp2e1</i>        | NM_021282    |
| A_51_P252410  | 1.8 | 2.6.E-02 | <i>Cope</i>          | NM_021538    |
| A_55_P2045048 | 1.8 | 4.3.E-02 | N/A                  | N/A          |
| A_52_P458697  | 1.8 | 2.3.E-02 | <i>Higd1a</i>        | NM_019814    |
| A_55_P2115851 | 1.8 | 3.6.E-02 | <i>9930013L23Rik</i> | NM_030728    |
| A_55_P2127692 | 1.8 | 2.8.E-02 | <i>Timm50</i>        | NM_025616    |
| A_55_P2093023 | 1.8 | 3.8.E-02 | <i>Xrcc6bp1</i>      | NM_026858    |
| A_52_P199299  | 1.8 | 3.1.E-02 | <i>Urgcp</i>         | NM_001077661 |
| A_66_P130035  | 1.8 | 2.1.E-02 | <i>Klk1b24</i>       | NM_010643    |
| A_51_P235139  | 1.8 | 4.2.E-02 | <i>Kbtbd5</i>        | NM_028202    |

|               |     |          |                     |              |
|---------------|-----|----------|---------------------|--------------|
| A_55_P2073945 | 1.8 | 2.6.E-02 | <i>Eif2b3</i>       | NM_001111277 |
| A_55_P2100866 | 1.8 | 4.6.E-02 | N/A                 | N/A          |
| A_55_P2115732 | 1.8 | 2.3.E-02 | <i>Kif1c</i>        | NM_153103    |
| A_51_P369311  | 1.8 | 3.1.E-02 | <i>Nox4</i>         | NM_015760    |
| A_52_P8903    | 1.8 | 3.2.E-02 | <i>D230037D09Ri</i> | NM_177140    |
| A_51_P519189  | 1.8 | 3.3.E-02 | <i>Eif3i</i>        | NM_018799    |
| A_55_P2153221 | 1.8 | 3.1.E-02 | N/A                 | N/A          |
| A_55_P1952882 | 1.8 | 2.4.E-02 | <i>Cyp4f18</i>      | AF233647     |
| A_55_P2024669 | 1.8 | 2.8.E-02 | <i>Myo6</i>         | NM_001039546 |
| A_52_P72654   | 1.8 | 2.7.E-02 | <i>Slc25a17</i>     | NM_011399    |
| A_55_P2161640 | 1.8 | 3.5.E-02 | <i>Slc38a1</i>      | NM_134086    |
| A_55_P1995417 | 1.8 | 4.4.E-02 | <i>1810031K17Ri</i> | NM_026977    |
| A_55_P1988083 | 1.7 | 2.8.E-02 | <i>Prc1</i>         | NM_145150    |
| A_55_P1963201 | 1.7 | 2.1.E-02 | <i>Chchd7</i>       | NM_181391    |
| A_52_P223571  | 1.7 | 2.0.E-02 | <i>Mlec</i>         | NM_175403    |
| A_55_P1968195 | 1.7 | 3.4.E-02 | <i>Cyp2d13</i>      | NR_003552    |
| A_55_P1979463 | 1.7 | 3.3.E-02 | <i>Prdx5</i>        | NM_012021    |
| A_55_P1981719 | 1.7 | 4.0.E-02 | <i>Rreb1</i>        | NR_033615    |
| A_55_P2229645 | 1.7 | 4.7.E-02 | <i>C77847</i>       | BG079317     |
| A_51_P276063  | 1.7 | 2.6.E-02 | <i>Phyh</i>         | NM_010726    |
| A_51_P506328  | 1.7 | 3.2.E-02 | <i>Cyp2j6</i>       | NM_010008    |
| A_55_P2043622 | 1.7 | 2.3.E-02 | <i>Grhpr</i>        | AK168351     |
| A_55_P1985758 | 1.7 | 4.1.E-02 | <i>Psmc9</i>        | NM_026000    |
| A_51_P281608  | 1.7 | 2.3.E-02 | <i>Olfir609</i>     | NM_147082    |
| A_55_P2067798 | 1.7 | 4.2.E-02 | <i>Vmn1r59</i>      | NM_207543    |
| A_55_P1990067 | 1.7 | 4.2.E-02 | N/A                 | N/A          |
| A_52_P96552   | 1.7 | 2.7.E-02 | <i>Vkorc1l1</i>     | NM_027121    |
| A_55_P2087061 | 1.7 | 2.6.E-02 | <i>Gm5151</i>       | NM_001101506 |
| A_51_P205385  | 1.7 | 2.8.E-02 | <i>Uox</i>          | NM_009474    |
| A_55_P2065577 | 1.7 | 3.9.E-02 | N/A                 | AK020097     |
| A_55_P2154387 | 1.7 | 3.6.E-02 | <i>Bmp4</i>         | NM_007554    |
| A_51_P150521  | 1.7 | 3.9.E-02 | <i>Mgat2</i>        | NM_146035    |
| A_51_P301964  | 1.7 | 2.8.E-02 | <i>Arl6ip1</i>      | NM_019419    |
| A_52_P376106  | 1.7 | 4.4.E-02 | <i>Slc30a9</i>      | NM_178651    |
| A_55_P2105406 | 1.7 | 4.7.E-02 | N/A                 | XM_003085830 |
| A_51_P128075  | 1.7 | 4.7.E-02 | <i>1700008P20Ri</i> | NM_001163810 |
| A_55_P1957618 | 1.7 | 3.7.E-02 | <i>Ak2</i>          | NM_001033966 |
| A_55_P2002933 | 1.7 | 2.4.E-02 | <i>Klk1b5</i>       | NM_008456    |
| A_51_P254234  | 1.7 | 2.7.E-02 | <i>Chchd4</i>       | NM_133928    |
| A_51_P125050  | 1.7 | 3.5.E-02 | <i>Wdr74</i>        | NM_134139    |
| A_51_P227345  | 1.7 | 2.5.E-02 | <i>Dpep1</i>        | NM_007876    |

|               |     |          |                      |              |
|---------------|-----|----------|----------------------|--------------|
| A_51_P108489  | 1.7 | 2.5.E-02 | <i>Gtl3</i>          | NM_008187    |
| A_55_P1972104 | 1.7 | 2.6.E-02 | <i>Acsm3</i>         | NM_212441    |
| A_51_P243930  | 1.7 | 4.2.E-02 | <i>Qrs1</i>          | NM_001081054 |
| A_55_P2093720 | 1.7 | 3.2.E-02 | <i>Dnajc5</i>        | NM_016775    |
| A_55_P2043682 | 1.7 | 4.8.E-02 | <i>Ubac1</i>         | BC021811     |
| A_55_P2145617 | 1.7 | 3.6.E-02 | <i>Krt80</i>         | NM_028770    |
| A_55_P2088715 | 1.7 | 3.9.E-02 | <i>Deb1</i>          | NM_026794    |
| A_55_P1998539 | 1.7 | 3.1.E-02 | <i>C1qtnf1</i>       | NM_001204129 |
| A_52_P378900  | 1.7 | 4.8.E-02 | <i>Lpcat2b</i>       | NM_027599    |
| A_55_P2029630 | 1.7 | 2.6.E-02 | <i>Mpdu1</i>         | NM_011900    |
| A_55_P2002068 | 1.7 | 3.9.E-02 | <i>Gm10510</i>       | AK145347     |
| A_55_P2102621 | 1.7 | 3.3.E-02 | <i>Eaf2</i>          | NM_001113401 |
| A_51_P402458  | 1.7 | 2.7.E-02 | <i>Anxa7</i>         | NM_009674    |
| A_55_P2186282 | 1.7 | 3.8.E-02 | <i>Agxt2</i>         | NM_001031851 |
| A_51_P468762  | 1.7 | 2.9.E-02 | <i>Alkbh6</i>        | NM_198027    |
| A_66_P129619  | 1.7 | 3.6.E-02 | <i>Gm2011</i>        | NR_038067    |
| A_55_P2027678 | 1.7 | 4.4.E-02 | N/A                  | AK006745     |
| A_55_P2114110 | 1.7 | 3.0.E-02 | <i>Cadm4</i>         | NM_153112    |
| A_66_P100021  | 1.7 | 2.7.E-02 | <i>Ncaph2</i>        | NM_001115132 |
| A_55_P2038479 | 1.7 | 4.1.E-02 | <i>Pddc1</i>         | NM_172116    |
| A_55_P2100120 | 1.7 | 2.8.E-02 | <i>Nme1</i>          | NM_008704    |
| A_51_P160372  | 1.7 | 2.9.E-02 | <i>Wbp1</i>          | NM_016757    |
| A_55_P1956873 | 1.7 | 2.6.E-02 | <i>Timm17a</i>       | NM_011590    |
| A_51_P102438  | 1.7 | 4.7.E-02 | <i>Ugt2b36</i>       | NM_001029867 |
| A_55_P2120155 | 1.7 | 3.6.E-02 | <i>Ccdc88b</i>       | NM_001081291 |
| A_51_P255329  | 1.7 | 2.9.E-02 | <i>Riok2</i>         | NM_025934    |
| A_55_P2425342 | 1.7 | 4.5.E-02 | <i>4932443L11Rik</i> | XR_105182    |
| A_51_P193716  | 1.7 | 4.3.E-02 | <i>Supv3l1</i>       | NM_181423    |
| A_55_P2081630 | 1.7 | 2.6.E-02 | <i>Gpa33</i>         | NM_021610    |
| A_55_P1990740 | 1.7 | 3.7.E-02 | N/A                  | N/A          |
| A_55_P2147220 | 1.7 | 3.2.E-02 | <i>Ak2</i>           | NM_016895    |
| A_52_P469277  | 1.7 | 5.0.E-02 | N/A                  | AF087578     |
| A_55_P2187043 | 1.7 | 4.1.E-02 | <i>Tpm1</i>          | NM_001164248 |
| A_51_P492125  | 1.7 | 2.7.E-02 | <i>Ciapi1</i>        | NM_134141    |
| A_52_P365768  | 1.7 | 2.6.E-02 | <i>Nsun2</i>         | NM_145354    |
| A_55_P2045535 | 1.7 | 3.4.E-02 | <i>6330545A04Rik</i> | N/A          |
| A_55_P2031676 | 1.7 | 3.1.E-02 | <i>Gstm6</i>         | NM_008184    |
| A_51_P234544  | 1.7 | 3.4.E-02 | <i>Azin1</i>         | NM_018745    |
| A_51_P155303  | 1.7 | 4.2.E-02 | <i>Rbfa</i>          | NM_199197    |
| A_55_P2052481 | 1.7 | 4.4.E-02 | <i>Olf1130</i>       | NM_146838    |
| A_55_P2081981 | 1.7 | 3.5.E-02 | N/A                  | AK046704     |

|               |     |          |                      |              |
|---------------|-----|----------|----------------------|--------------|
| A_55_P2040280 | 1.7 | 3.1.E-02 | <i>Dhps</i>          | NM_001039514 |
| A_52_P303077  | 1.7 | 5.0.E-02 | <i>Rogdi</i>         | NM_133185    |
| A_55_P1960208 | 1.7 | 2.5.E-02 | <i>Vcan</i>          | NM_172955    |
| A_55_P2112245 | 1.7 | 4.9.E-02 | <i>Ccdc13</i>        | AK038868     |
| A_51_P435922  | 1.7 | 4.1.E-02 | <i>Rsph9</i>         | NM_029338    |
| A_55_P2096772 | 1.7 | 4.7.E-02 | <i>Zfp11</i>         | NM_172462    |
| A_55_P1963529 | 1.7 | 3.9.E-02 | <i>Abcb10</i>        | NM_019552    |
| A_51_P395473  | 1.7 | 3.6.E-02 | <i>Tenc1</i>         | NM_153533    |
| A_55_P2019217 | 1.7 | 3.7.E-02 | <i>Gm2695</i>        | XR_106466    |
| A_55_P1987675 | 1.7 | 3.2.E-02 | <i>N/A</i>           | N/A          |
| A_52_P159885  | 1.7 | 3.9.E-02 | <i>Ddx49</i>         | NM_001024922 |
| A_55_P2007233 | 1.7 | 4.3.E-02 | <i>A530021J07Rii</i> | XR_035179    |
| A_55_P2072801 | 1.7 | 4.6.E-02 | <i>Lypd5</i>         | NM_029806    |
| A_51_P204702  | 1.7 | 3.3.E-02 | <i>Olfra493</i>      | NM_146310    |
| A_52_P100199  | 1.7 | 3.3.E-02 | <i>Abhd10</i>        | NM_172511    |
| A_55_P2176320 | 1.7 | 4.1.E-02 | <i>Pgc</i>           | NM_025973    |
| A_52_P302345  | 1.7 | 3.3.E-02 | <i>Cyp4v3</i>        | NM_133969    |
| A_51_P235705  | 1.7 | 4.2.E-02 | <i>Tsfm</i>          | NM_025537    |
| A_51_P480904  | 1.7 | 3.8.E-02 | <i>Blmh</i>          | NM_178645    |
| A_55_P2166349 | 1.7 | 3.0.E-02 | <i>N/A</i>           | BC024335     |
| A_55_P2053616 | 1.7 | 2.9.E-02 | <i>N/A</i>           | N/A          |
| A_51_P376407  | 1.7 | 3.5.E-02 | <i>D9Ert402e</i>     | NM_001013405 |
| A_52_P469381  | 1.7 | 3.6.E-02 | <i>Comtd1</i>        | NM_026965    |
| A_51_P309988  | 1.7 | 3.7.E-02 | <i>Gprc5c</i>        | NM_147217    |
| A_55_P2168736 | 1.7 | 2.6.E-02 | <i>Relb</i>          | NM_009046    |
| A_55_P2019014 | 1.6 | 4.4.E-02 | <i>Tmem120b</i>      | NM_001039723 |
| A_51_P422893  | 1.6 | 3.5.E-02 | <i>Tmem14a</i>       | NM_029398    |
| A_51_P116687  | 1.6 | 4.3.E-02 | <i>1700010I14Rik</i> | NM_025851    |
| A_55_P2029498 | 1.6 | 4.5.E-02 | <i>Osbpl1a</i>       | NM_207530    |
| A_52_P45797   | 1.6 | 2.8.E-02 | <i>Rg9mtd2</i>       | NM_175389    |
| A_55_P2026639 | 1.6 | 3.6.E-02 | <i>Gm11564</i>       | NM_001100614 |
| A_51_P440790  | 1.6 | 3.7.E-02 | <i>Dpp7</i>          | NM_031843    |
| A_55_P2005956 | 1.6 | 4.7.E-02 | <i>Egfbp2</i>        | NM_010115    |
| A_55_P2127288 | 1.6 | 3.5.E-02 | <i>Spsb1</i>         | N/A          |
| A_55_P2051791 | 1.6 | 3.1.E-02 | <i>Cbr4</i>          | NM_145595    |
| A_55_P2072468 | 1.6 | 3.8.E-02 | <i>Sirt6</i>         | NM_181586    |
| A_55_P2012689 | 1.6 | 4.0.E-02 | <i>Stk16</i>         | NM_011494    |
| A_55_P2043352 | 1.6 | 4.0.E-02 | <i>LOC100503983</i>  | XM_003085022 |
| A_55_P2073795 | 1.6 | 3.7.E-02 | <i>Mecr</i>          | NM_025297    |
| A_55_P2159061 | 1.6 | 4.2.E-02 | <i>Taar8a</i>        | NM_001010830 |
| A_55_P2334424 | 1.6 | 4.9.E-02 | <i>D630024D03Ri</i>  | AK158188     |

|               |     |          |                     |              |
|---------------|-----|----------|---------------------|--------------|
| A_51_P465809  | 1.6 | 4.1.E-02 | <i>Slc30a9</i>      | NM_178651    |
| A_55_P2076846 | 1.6 | 3.0.E-02 | <i>Tead2</i>        | NM_011565    |
| A_66_P120605  | 1.6 | 4.7.E-02 | <i>Fbxo34</i>       | NM_001146085 |
| A_55_P2187053 | 1.6 | 4.7.E-02 | <i>Tpm1</i>         | NM_001164255 |
| A_52_P217437  | 1.6 | 4.2.E-02 | <i>Htra3</i>        | NM_001042615 |
| A_52_P618187  | 1.6 | 4.0.E-02 | <i>Mrs2</i>         | NM_001013389 |
| A_55_P2126363 | 1.6 | 4.7.E-02 | <i>Wnt10b</i>       | NM_011718    |
| A_55_P2169218 | 1.6 | 4.0.E-02 | N/A                 | N/A          |
| A_51_P160744  | 1.6 | 4.5.E-02 | <i>Ndufb3</i>       | NM_025597    |
| A_51_P394115  | 1.6 | 4.8.E-02 | <i>Aadac</i>        | NM_023383    |
| A_55_P2063041 | 1.6 | 4.8.E-02 | <i>Slmo2</i>        | NM_025531    |
| A_55_P2074811 | 1.6 | 3.4.E-02 | <i>Zfp609</i>       | NM_172536    |
| A_52_P230904  | 1.6 | 2.9.E-02 | <i>Wdr18</i>        | NM_175450    |
| A_51_P305547  | 1.6 | 4.8.E-02 | <i>Snai2</i>        | NM_011415    |
| A_55_P1978847 | 1.6 | 4.6.E-02 | <i>Vmn1r183</i>     | NM_203489    |
| A_52_P24986   | 1.6 | 4.2.E-02 | <i>Agpat6</i>       | NM_018743    |
| A_51_P490171  | 1.6 | 3.8.E-02 | <i>Nubp2</i>        | NM_011956    |
| A_55_P2003216 | 1.6 | 4.9.E-02 | <i>Igsf5</i>        | NM_001177886 |
| A_55_P1976689 | 1.6 | 3.7.E-02 | <i>Snrnp35</i>      | NM_029532    |
| A_66_P121117  | 1.6 | 4.2.E-02 | <i>Serpina1d</i>    | NM_009246    |
| A_51_P109888  | 1.6 | 3.7.E-02 | <i>Coro1b</i>       | NM_011778    |
| A_52_P117313  | 1.6 | 3.4.E-02 | <i>Azin1</i>        | NM_018745    |
| A_55_P2043684 | 1.6 | 4.5.E-02 | <i>Ubac1</i>        | NM_133835    |
| A_51_P109421  | 1.6 | 4.5.E-02 | <i>Eif2d</i>        | NM_010709    |
| A_51_P468329  | 1.6 | 4.3.E-02 | <i>Psmb7</i>        | NM_011187    |
| A_55_P1985458 | 1.6 | 4.0.E-02 | <i>Susd3</i>        | AK013276     |
| A_52_P1003335 | 1.6 | 3.0.E-02 | <i>5830473C10Ri</i> | XM_886735    |
| A_51_P357561  | 1.6 | 4.3.E-02 | <i>Fbxw9</i>        | NM_026791    |
| A_55_P2044433 | 1.6 | 4.9.E-02 | <i>LOC10050401</i>  | XR_108069    |
| A_55_P2146650 | 1.6 | 4.5.E-02 | N/A                 | N/A          |
| A_55_P2429714 | 1.6 | 3.3.E-02 | <i>4930455C21Ri</i> | NM_024273    |
| A_52_P10781   | 1.6 | 4.6.E-02 | <i>Lman1</i>        | NM_001172062 |
| A_51_P311096  | 1.6 | 4.5.E-02 | <i>2410003K15Ri</i> | NM_029353    |
| A_55_P2073642 | 1.6 | 4.3.E-02 | <i>1600014C10Ri</i> | NM_001085385 |
| A_55_P2302000 | 1.6 | 4.0.E-02 | <i>4930455J16Ri</i> | AK030052     |
| A_55_P2248556 | 1.6 | 3.8.E-02 | <i>6530402F18Ri</i> | AK220426     |
| A_52_P343343  | 1.6 | 3.7.E-02 | <i>Rpl7l1</i>       | NM_025433    |
| A_52_P52272   | 1.6 | 4.7.E-02 | <i>Zfp846</i>       | NM_172919    |
| A_55_P2009875 | 1.6 | 4.5.E-02 | N/A                 | N/A          |
| A_55_P1953972 | 1.6 | 4.9.E-02 | <i>Pdhb</i>         | NM_024221    |
| A_66_P115056  | 1.6 | 4.5.E-02 | <i>Gpn1</i>         | NM_133756    |



|               |     |          |                 |              |
|---------------|-----|----------|-----------------|--------------|
| A_55_P2011341 | 1.6 | 3.8.E-02 | <i>N/A</i>      | <i>N/A</i>   |
| A_51_P435068  | 1.6 | 4.1.E-02 | <i>Acadsb</i>   | NM_025826    |
| A_55_P2137521 | 1.6 | 4.5.E-02 | <i>Nmral1</i>   | NM_026393    |
| A_55_P2021455 | 1.6 | 5.0.E-02 | <i>N/A</i>      | <i>N/A</i>   |
| A_51_P520106  | 1.6 | 4.6.E-02 | <i>Adprhl2</i>  | NM_133883    |
| A_55_P1988070 | 1.6 | 4.4.E-02 | <i>Eef1g</i>    | NM_026007    |
| A_55_P1984601 | 1.6 | 4.9.E-02 | <i>Vapb</i>     | NM_019806    |
| A_52_P215829  | 1.6 | 5.0.E-02 | <i>Alg13</i>    | NR_037145    |
| A_55_P2031288 | 1.6 | 3.6.E-02 | <i>Abcg5</i>    | NM_031884    |
| A_55_P2003211 | 1.6 | 4.9.E-02 | <i>Igsf5</i>    | NM_001177887 |
| A_55_P2013756 | 1.6 | 4.5.E-02 | <i>Sult5a1</i>  | XR_108050    |
| A_55_P2111429 | 1.6 | 3.4.E-02 | <i>Btf3l4</i>   | NM_027453    |
| A_52_P180335  | 1.6 | 4.3.E-02 | <i>Mrpl28</i>   | NM_024227    |
| A_55_P2094362 | 1.6 | 4.8.E-02 | <i>Erp29</i>    | NM_026129    |
| A_51_P419759  | 1.6 | 4.3.E-02 | <i>Tha1</i>     | NM_027919    |
| A_51_P483311  | 1.6 | 4.8.E-02 | <i>Mpv17l2</i>  | NM_183170    |
| A_51_P504522  | 1.6 | 5.0.E-02 | <i>Der11</i>    | NM_024207    |
| A_55_P2020084 | 1.6 | 3.6.E-02 | <i>N/A</i>      | <i>N/A</i>   |
| A_55_P2117319 | 1.6 | 5.0.E-02 | <i>Ntan1</i>    | NM_010946    |
| A_55_P1963389 | 1.6 | 4.2.E-02 | <i>N/A</i>      | <i>N/A</i>   |
| A_55_P1979491 | 1.6 | 3.7.E-02 | <i>Cd28</i>     | NM_007642    |
| A_51_P407193  | 1.6 | 4.8.E-02 | <i>Clp1</i>     | NM_133840    |
| A_55_P2022128 | 1.6 | 4.7.E-02 | <i>Cntnap1</i>  | NM_016782    |
| A_52_P676063  | 1.6 | 4.7.E-02 | <i>Tmem126b</i> | NM_026734    |
| A_55_P2028064 | 1.6 | 4.1.E-02 | <i>Kdm4b</i>    | NM_172132    |
| A_55_P2037657 | 1.6 | 4.9.E-02 | <i>Gm10427</i>  | AK149283     |
| A_55_P2002557 | 1.6 | 4.4.E-02 | <i>Srebf1</i>   | NM_011480    |
| A_55_P2114785 | 1.6 | 4.0.E-02 | <i>N/A</i>      | <i>N/A</i>   |
| A_55_P2025006 | 1.6 | 4.9.E-02 | <i>Klk1b26</i>  | NM_010644    |
| A_55_P2150053 | 1.6 | 4.7.E-02 | <i>Yipf5</i>    | NM_023311    |
| A_55_P2048928 | 1.6 | 4.1.E-02 | <i>Cbfb</i>     | NM_001161458 |
| A_55_P2000254 | 1.6 | 4.4.E-02 | <i>Rundc2a</i>  | NM_001163498 |
| A_55_P1992839 | 1.6 | 4.5.E-02 | <i>Dsn1</i>     | NM_025853    |
| A_55_P2006554 | 1.6 | 4.3.E-02 | <i>Eif4e2</i>   | NM_001039169 |
| A_51_P462556  | 1.6 | 4.2.E-02 | <i>Gm10658</i>  | XR_105260    |
| A_55_P2317665 | 1.6 | 4.7.E-02 | <i>E2f1</i>     | NM_007891    |
| A_55_P2056995 | 1.5 | 4.6.E-02 | <i>Gcgr</i>     | NM_008101    |
| A_66_P123787  | 1.5 | 4.4.E-02 | <i>Lars2</i>    | NM_153168    |
| A_51_P411297  | 1.5 | 4.4.E-02 | <i>Nup50</i>    | NM_016714    |
| A_51_P362554  | 1.5 | 4.9.E-02 | <i>Olf1307</i>  | NM_001011787 |
| A_55_P1964302 | 1.5 | 4.7.E-02 | <i>Timm8a1</i>  | NM_013898    |

|               |     |                          |           |
|---------------|-----|--------------------------|-----------|
| A_51_P125567  | 1.5 | 4.7.E-02 <i>Mettl13</i>  | NM_144877 |
| A_55_P2007771 | 1.5 | 5.0.E-02 <i>Catsper2</i> | NM_153075 |
| A_66_P132037  | 1.5 | 4.8.E-02 <i>Jmjd4</i>    | NM_178659 |
| A_52_P263201  | 1.5 | 4.8.E-02 <i>Tmem33</i>   | NM_030108 |
| A_52_P139097  | 1.5 | 4.9.E-02 <i>N/A</i>      | N/A       |
